# Supplementary material for: Determination of the semiexperimental equilibrium structure of 2-acetylthiophene in the presence of methyl internal rotation and substituent effects compared to thiophene
Source: Royal Society of Chemistry journal article supplement (doi:10.1039/d1cp04478h), 2022-01-01
Supplement: d1cp04478h1.pdf [file d1cp04478h1.pdf]

**Table S-1:** Coefficients of the one-dimensional Fourier expansion for the potential energy curves of 2AT given in Figure 2 calculated at the MP2 and B3LYP-D3BJ/6-311++G(d,p) levels of theory. The potential is expanded as  $V(\varphi) = \sum_{i=0}^{12} a_i f_i$  for MP2 and  $V(\varphi) = \sum_{i=0}^9 a_i f_i$  for B3LYP-D3BJ.

| <i>i</i> | <i>f<sub>i</sub></i> | MP2                            |                                         | B3LYP-D3BJ                     |                                         |
|----------|----------------------|--------------------------------|-----------------------------------------|--------------------------------|-----------------------------------------|
|          |                      | <i>a<sub>i</sub></i> / Hartree | <i>a<sub>i</sub></i> / cm <sup>-1</sup> | <i>a<sub>i</sub></i> / Hartree | <i>a<sub>i</sub></i> / cm <sup>-1</sup> |
| 0        | 1                    | -704.3291215                   |                                         | -705.7867039                   |                                         |
| 1        | cos 1α               | -0.0006664                     | -146.3                                  | -0.0002781                     | -61.0                                   |
| 2        | cos 2α               | -0.0054717                     | -1200.9                                 | -0.0066204                     | -1453.0                                 |
| 3        | cos 3α               | -0.0001464                     | -32.1                                   | -0.0002363                     | -51.9                                   |
| 4        | cos 4α               | 0.0006446                      | 141.5                                   | 0.0004726                      | 103.7                                   |
| 5        | cos 5α               | -0.0001127                     | -24.7                                   | -0.0000770                     | -16.9                                   |
| 6        | cos 6α               | -0.0000269                     | -5.9                                    | -0.0000661                     | -14.5                                   |
| 7        | cos 8α               | 0.0000738                      | 16.2                                    | /                              | /                                       |

**Table S-2a:** Nuclear Coordinates in the principal axis system of *anti*-2AT and *syn*-2AT optimized at the B3LYP-D3BJ/6-311++G(d,p) level of theory (for atom numbering see Figure 1).

|            | <i>syn</i> -2AT |              |              | <i>anti</i> -2AT |              |              |
|------------|-----------------|--------------|--------------|------------------|--------------|--------------|
|            | <i>a</i> / Å    | <i>b</i> / Å | <i>c</i> / Å | <i>a</i> / Å     | <i>b</i> / Å | <i>c</i> / Å |
| <b>S1</b>  | -0.953154       | -1.129718    | -0.000215    | -0.883991        | -1.162249    | -0.000024    |
| <b>C3</b>  | 0.167446        | 0.208248     | -0.000055    | 0.156924         | 0.243875     | 0.000000     |
| <b>C2</b>  | -0.500266       | 1.413605     | -0.000303    | -0.589429        | 1.399795     | 0.000003     |
| <b>C4</b>  | -1.910718       | 1.267983     | 0.000078     | -1.986519        | 1.164361     | 0.000022     |
| <b>C5</b>  | -2.295419       | -0.048616    | 0.000469     | -2.295633        | -0.171521    | 0.000016     |
| <b>C6</b>  | 1.613275        | -0.061779    | -0.000076    | 1.632782         | 0.166132     | -0.000011    |
| <b>O7</b>  | 2.040571        | -1.203321    | 0.000210     | 2.299415         | 1.185138     | -0.000023    |
| <b>C8</b>  | 2.542995        | 1.135780     | 0.000104     | 2.274785         | -1.205666    | 0.000041     |
| <b>H9</b>  | -3.300923       | -0.441775    | 0.000841     | -3.272775        | -0.629977    | 0.000029     |
| <b>H10</b> | -2.607974       | 2.094603     | 0.000147     | -2.734473        | 1.945419     | 0.000043     |
| <b>H11</b> | 0.005232        | 2.369704     | -0.000514    | -0.121776        | 2.374482     | 0.000003     |
| <b>H12</b> | 2.370369        | 1.757297     | -0.882759    | 1.966055         | -1.774429    | 0.882130     |
| <b>H13</b> | 3.572239        | 0.781490     | 0.000323     | 3.357407         | -1.093684    | -0.000211    |
| <b>H14</b> | 2.370000        | 1.757344     | 0.882861     | 1.965661         | -1.774741    | -0.881706    |

**Table S-2b:** Nuclear coordinates in the principal axis system of *anti*-2AT and *syn*-2AT optimized at the MP2/6-311++G(d,p) level of theory (for atom numbering see Figure 1).

|            | <i>syn</i> -2AT |              |              | <i>anti</i> -2AT |              |              |
|------------|-----------------|--------------|--------------|------------------|--------------|--------------|
|            | <i>a</i> / Å    | <i>b</i> / Å | <i>c</i> / Å | <i>a</i> / Å     | <i>b</i> / Å | <i>c</i> / Å |
| <b>S1</b>  | -0.942077       | -1.123837    | 0.000802     | 0.873736         | -1.151212    | 0.064566     |
| <b>C3</b>  | 0.160303        | 0.199028     | 0.001549     | -0.149529        | 0.236593     | 0.027211     |
| <b>C2</b>  | -0.512946       | 1.418873     | -0.000335    | 0.600702         | 1.405593     | -0.054691    |
| <b>C4</b>  | -1.917553       | 1.262818     | -0.000953    | 1.990838         | 1.159925     | -0.071778    |
| <b>C5</b>  | -2.288941       | -0.072805    | -0.000715    | 2.286967         | -0.193672    | -0.014957    |
| <b>C6</b>  | 1.614564        | -0.058733    | -0.000037    | -1.631514        | 0.163058     | 0.015487     |
| <b>O7</b>  | 2.051400        | -1.204246    | -0.001820    | -2.298952        | 1.185481     | 0.099831     |
| <b>C8</b>  | 2.526106        | 1.151338     | 0.000785     | -2.267258        | -1.202681    | -0.140547    |
| <b>H9</b>  | -3.292389       | -0.479872    | -0.000466    | 3.261640         | -0.664715    | -0.001659    |
| <b>H10</b> | -2.630328       | 2.079818     | -0.002002    | 2.753283         | 1.928904     | -0.126708    |
| <b>H11</b> | -0.004221       | 2.376749     | -0.000395    | 0.129588         | 2.381304     | -0.095835    |
| <b>H12</b> | 2.337220        | 1.767558     | -0.883436    | -2.064223        | -1.590888    | -1.144173    |
| <b>H13</b> | 3.562394        | 0.812270     | -0.000693    | -3.344780        | -1.115302    | 0.002607     |
| <b>H14</b> | 2.339015        | 1.765316     | 0.886921     | -1.852833        | -1.912527    | 0.582119     |

**Table S-3a:** Equilibrium rotational constants,  $X_e$  ( $X = A, B, C$ ) of *syn*-2AT calculated at various levels of theory. The deviations  $\Delta X$  between the calculated and the ground state experimental values  $X_0$  are given in MHz. The relative deviations of the semi-experimental equilibrium structures with respect to  $X_e^{B0}$  are given in %. The relative energy difference (in kJ/mol) is  $E_{anti-2AT} - E_{syn-2AT}$ .

| Method/Basis Set           | <i>A</i> / | $\Delta A$ / | <i>B</i> / | $\Delta B$ / | <i>C</i> / | $\Delta C$ / | $\Delta E$ / |
|----------------------------|------------|--------------|------------|--------------|------------|--------------|--------------|
|                            | MHz        | MHz          | MHz        | MHz          | MHz        | MHz          | kJ/mol       |
| MP2/6-31G(d,p)             | 3561.3     | -26.8        | 1418.8     | 2.9          | 1021.0     | -1.1         | 5.5          |
| MP2/6-31+G(d,p)            | 3552.2     | -35.9        | 1414.5     | -1.4         | 1018.1     | -4.0         | 5.1          |
| MP2/6-31++G(d,p)           | 3552.2     | -35.9        | 1414.5     | -1.4         | 1018.0     | -4.1         | 4.8          |
| MP2/6-311G(d,p)            | 3560.2     | -27.9        | 1416.8     | 0.9          | 1019.9     | -2.2         | 6.2          |
| MP2/6-311+G(d,p)           | 3555.0     | -33.1        | 1414.5     | -1.4         | 1018.3     | -3.8         | 5.1          |
| MP2/6-311++G(d,p)          | 3554.6     | -33.5        | 1414.5     | -1.4         | 1018.3     | -3.8         | 5.7          |
| MP2/6-311G(df,pd)          | 3585.9     | -2.2         | 1425.0     | 9.1          | 1026.3     | 4.2          | 5.4          |
| MP2/6-311+G(df,pd)         | 3580.6     | -7.5         | 1422.2     | 6.3          | 1024.4     | 2.3          | 4.1          |
| MP2/6-311++G(df,pd)        | 3580.3     | -7.8         | 1422.3     | 6.4          | 1024.4     | 2.3          | 3.8          |
| MP2/6-311G(2d,2p)          | 3565.5     | -22.6        | 1421.7     | 5.8          | 1022.8     | 0.7          | 4.8          |
| MP2/6-311+G(2d,2p)         | 3561.5     | -26.6        | 1420.4     | 4.5          | 1021.8     | -0.3         | 3.8          |
| MP2/6-311++G(2d,2p)        | 3561.4     | -26.7        | 1420.4     | 4.5          | 1021.8     | -0.3         | 3.7          |
| MP2/6-311G(2df,2pd)        | 3589.8     | 1.8          | 1430.2     | 14.3         | 1029.2     | 7.1          | 4.9          |
| MP2/6-311+G(2df,2pd)       | 3584.9     | -3.2         | 1428.2     | 12.3         | 1027.8     | 5.7          | 3.5          |
| MP2/6-311++G(2df,2pd)      | 3584.7     | -3.4         | 1428.1     | 12.2         | 1027.7     | 5.6          | 3.5          |
| MP2/6-311G(3df,3pd)        | 3596.6     | 8.5          | 1429.4     | 13.5         | 1029.4     | 7.3          | 3.7          |
| MP2/6-311+G(3df,3pd)       | 3591.2     | 3.1          | 1428.6     | 12.7         | 1028.6     | 6.5          | 3.0          |
| MP2/6-311++G(3df,3pd)      | 3591.1     | 3.0          | 1428.6     | 12.7         | 1028.5     | 6.4          | 3.0          |
| MP2/cc-pVDZ                | 3521.0     | -67.1        | 1405.3     | -10.6        | 1010.8     | -11.3        | 3.7          |
| MP2/cc-pVTZ                | 3578.8     | -9.3         | 1426.0     | 10.1         | 1026.1     | 4.0          | 3.6          |
| MP2/aug-cc-pVDZ            | 3507.7     | -80.4        | 1401.3     | -14.6        | 1007.7     | -14.4        | 3.7          |
| MP2/aug-cc-pVTZ            | 3576.6     | -11.5        | 1425.8     | 9.9          | 1025.9     | 3.8          | 3.5          |
| B3LYP-D3/6-31G(d,p)        | 3545.2     | -42.9        | 1404.8     | -11.1        | 1012.5     | -9.6         | 2.6          |
| B3LYP-D3/6-31+G(d,p)       | 3539.9     | -48.2        | 1400.5     | -15.4        | 1009.8     | -12.3        | 2.0          |
| B3LYP-D3/6-31++G(d,p)      | 3539.9     | -48.2        | 1400.4     | -15.5        | 1009.8     | -12.3        | 2.0          |
| B3LYP-D3/6-311G(d,p)       | 3557.6     | -30.5        | 1407.2     | -8.7         | 1014.7     | -7.4         | 3.2          |
| B3LYP-D3/6-311+G(d,p)      | 3554.9     | -33.2        | 1405.0     | -10.9        | 1013.4     | -8.7         | 2.1          |
| B3LYP-D3/6-311++G(d,p)     | 3554.8     | -33.3        | 1405.0     | -10.9        | 1013.3     | -8.8         | 2.1          |
| B3LYP-D3/6-311G(df,pd)     | 3568.8     | -19.3        | 1410.7     | -5.2         | 1017.4     | -4.7         | 3.1          |
| B3LYP-D3/6-311+G(df,pd)    | 3566.7     | -21.4        | 1408.6     | -7.3         | 1016.1     | -6.0         | 2.0          |
| B3LYP-D3/6-311++G(df,pd)   | 3566.6     | -21.5        | 1408.5     | -7.4         | 1016.1     | -6.0         | 1.9          |
| B3LYP-D3/6-311G(3df,3pd)   | 3591.7     | 3.6          | 1415.0     | -0.9         | 1021.5     | -0.6         | 2.4          |
| B3LYP-D3/6-311+G(3df,3pd)  | 3587.7     | -0.4         | 1414.4     | -1.5         | 1020.9     | -1.2         | 1.9          |
| B3LYP-D3/6-311++G(3df,3pd) | 3587.6     | -0.5         | 1414.4     | -1.5         | 1020.8     | -1.3         | 1.9          |
| B3LYP-D3/cc-pVDZ           | 3533.6     | -54.5        | 1402.3     | -13.6        | 1010.3     | -11.8        | 1.3          |
| B3LYP-D3/cc-pVTZ           | 3578.4     | -9.7         | 1412.2     | -3.7         | 1019.0     | -3.1         | 2.0          |
| B3LYP-D3/aug-cc-pVDZ       | 3531.8     | -56.3        | 1398.9     | -17.0        | 1008.3     | -13.8        | 2.3          |

|                                  |        |       |        |       |        |       |     |
|----------------------------------|--------|-------|--------|-------|--------|-------|-----|
| B3LYP-D3/aug-cc-pVTZ             | 3577.8 | -10.3 | 1411.7 | -4.2  | 1018.7 | -3.4  | 1.9 |
| B3LYP-D3/6-311G(2d,2p)           | 3575.1 | -13.0 | 1411.5 | -4.4  | 1018.4 | -3.7  | 3.2 |
| B3LYP-D3/6-311+G(2d,2p)          | 3572.1 | -16.0 | 1410.3 | -5.6  | 1017.5 | -4.6  | 2.2 |
| B3LYP-D3/6-311++G(2d,2p)         | 3572.0 | -16.1 | 1410.3 | -5.6  | 1017.5 | -4.6  | 2.2 |
| B3LYP-D3/6-311G(2df,2pd)         | 3584.6 | -3.5  | 1414.1 | -1.8  | 1020.5 | -1.6  | 3.2 |
| B3LYP-D3/6-311+G(2df,2pd)        | 3581.7 | -6.4  | 1412.5 | -3.4  | 1019.4 | -2.7  | 2.1 |
| B3LYP-D3/6-311++G(2df,2pd)       | 3581.7 | -6.4  | 1412.5 | -3.4  | 1019.4 | -2.7  | 2.1 |
| B3LYP-D3BJ/6-31G(d,p)            | 3549.6 | -38.5 | 1409.7 | -6.2  | 1015.4 | -6.7  | 3.7 |
| B3LYP-D3BJ/6-31+G(d,p)           | 3544.0 | -44.1 | 1405.5 | -10.4 | 1012.7 | -9.4  | 3.0 |
| B3LYP-D3BJ/6-31++G(d,p)          | 3544.0 | -44.1 | 1405.5 | -10.4 | 1012.7 | -9.4  | 3.0 |
| B3LYP-D3BJ/6-311G(d,p)           | 3561.9 | -26.2 | 1411.9 | -4.0  | 1017.5 | -4.6  | 4.3 |
| B3LYP-D3BJ/6-311+G(d,p)          | 3559.1 | -29.0 | 1409.9 | -6.0  | 1016.3 | -5.8  | 3.1 |
| B3LYP-D3BJ/6-311++G(d,p)         | 3559.0 | -29.1 | 1409.9 | -6.0  | 1016.2 | -5.9  | 3.1 |
| B3LYP-D3BJ/6-311G(df,pd)         | 3572.6 | -15.5 | 1415.5 | -0.4  | 1020.2 | -1.9  | 4.2 |
| B3LYP-D3BJ/6-311+G(df,pd)        | 3570.2 | -17.9 | 1413.5 | -2.4  | 1019.0 | -3.1  | 3.0 |
| B3LYP-D3BJ/6-311++G(df,pd)       | 3570.1 | -18.0 | 1413.5 | -2.4  | 1019.0 | -3.1  | 2.9 |
| B3LYP-D3BJ/6-311G(3df,3pd)       | 3595.1 | 7.0   | 1419.6 | 3.7   | 1024.2 | 2.1   | 3.5 |
| B3LYP-D3BJ/6-311+G(3df,3pd)      | 3591.1 | 3.0   | 1419.1 | 3.2   | 1023.6 | 1.5   | 2.8 |
| B3LYP-D3BJ/6-311++G(3df,3pd)     | 3591.0 | 2.9   | 1419.1 | 3.2   | 1023.6 | 1.5   | 2.8 |
| B3LYP-D3BJ/cc-pVDZ               | 3538.2 | -49.9 | 1407.2 | -8.7  | 1013.2 | -8.9  | 2.4 |
| B3LYP-D3BJ/cc-pVTZ               | 3582.2 | -5.9  | 1417.0 | 1.1   | 1021.7 | -0.4  | 3.0 |
| B3LYP-D3BJ/aug-cc-pVDZ           | 3536.2 | -51.9 | 1403.9 | -12.0 | 1011.3 | -10.8 | 3.2 |
| B3LYP-D3BJ/aug-cc-pVTZ           | 3581.5 | -6.6  | 1416.6 | 0.7   | 1021.5 | -0.6  | 2.9 |
| B3LYP-D3BJ/6-311G(2d,2p)         | 3579.2 | -8.9  | 1416.5 | 0.6   | 1021.3 | -0.8  | 4.3 |
| B3LYP-D3BJ/6-311+G(2d,2p)        | 3575.8 | -12.3 | 1415.4 | -0.5  | 1020.4 | -1.7  | 3.2 |
| B3LYP-D3BJ/6-311++G(2d,2p)       | 3575.7 | -12.4 | 1415.4 | -0.5  | 1020.4 | -1.7  | 3.2 |
| B3LYP-D3BJ/6-311G(2df,2pd)       | 3588.6 | 0.5   | 1419.0 | 3.1   | 1023.3 | 1.2   | 4.3 |
| B3LYP-D3BJ/6-311+G(2df,2pd)      | 3585.4 | -2.7  | 1417.5 | 1.6   | 1022.3 | 0.2   | 3.1 |
| B3LYP-D3BJ/6-311++G(2df,2pd)     | 3585.4 | -2.7  | 1417.4 | 1.5   | 1022.2 | 0.1   | 3.1 |
| CAM-B3LYP-D3BJ/6-311G(d,p)       | 3602.8 | 14.8  | 1421.0 | 5.1   | 1025.6 | 3.5   | 4.3 |
| CAM-B3LYP-D3BJ/<br>6-311+G(d,p)  | 3600.1 | 12.0  | 1418.7 | 2.8   | 1024.2 | 2.1   | 3.2 |
| CAM-B3LYP-D3BJ/<br>6-311++G(d,p) | 3600.0 | 11.9  | 1418.7 | 2.8   | 1024.1 | 2.0   | 3.1 |
| CAM-B3LYP-D3BJ/cc-pVDZ           | 3576.7 | -11.4 | 1412.5 | -3.4  | 1019.1 | -3.0  | 3.4 |
| CAM-B3LYP-D3BJ/cc-pVTZ           | 3621.8 | 33.8  | 1425.4 | 9.5   | 1029.4 | 7.3   | 3.1 |
| CAM-B3LYP-D3BJ/aug-cc-pVDZ       | 3579.2 | -8.9  | 1415.9 | 0.0   | 1021.1 | -1.0  | 2.5 |
| CAM-B3LYP-D3BJ/aug-cc-pVTZ       | 3622.6 | 34.5  | 1426.0 | 10.1  | 1029.7 | 7.6   | 3.1 |
| M06-2X/6-31G(d,p)                | 3583.2 | -4.9  | 1418.1 | 2.2   | 1022.5 | 0.4   | 3.8 |
| M06-2X/6-31+G(d,p)               | 3579.2 | -8.9  | 1414.5 | -1.4  | 1020.3 | -1.8  | 3.3 |
| M06-2X/6-31++G(d,p)              | 3579.2 | -8.9  | 1414.4 | -1.5  | 1020.3 | -1.8  | 3.3 |
| M06-2X/6-311G(d,p)               | 3591.7 | 3.6   | 1420.0 | 4.1   | 1024.1 | 2.0   | 4.3 |
| M06-2X/6-311+G(d,p)              | 3590.1 | 2.0   | 1417.9 | 2.0   | 1022.9 | 0.8   | 3.3 |
| M06-2X/6-311++G(d,p)             | 3589.9 | 1.8   | 1417.9 | 2.0   | 1022.9 | 0.8   | 3.2 |
| M06-2X/6-311G(df,pd)             | 3600.6 | 12.5  | 1422.5 | 6.6   | 1026.2 | 4.1   | 4.1 |
| M06-2X/6-311+G(df,pd)            | 3599.3 | 11.3  | 1420.5 | 4.6   | 1025.0 | 2.9   | 3.1 |
| M06-2X/6-311++G(df,pd)           | 3599.3 | 11.3  | 1420.5 | 4.6   | 1025.0 | 2.9   | 3.0 |

|                                   |         |                   |         |                   |         |                   |     |
|-----------------------------------|---------|-------------------|---------|-------------------|---------|-------------------|-----|
| M06-2X/6-311G(3df,3pd)            | 3620.9  | 32.8              | 1425.9  | 10.0              | 1029.5  | 7.4               | 3.5 |
| M06-2X/6-311+G(3df,3pd)           | 3617.6  | 29.5              | 1425.7  | 9.8               | 1029.2  | 7.1               | 3.1 |
| M06-2X/6-311++G(3df,3pd)          | 3617.5  | 29.4              | 1425.7  | 9.8               | 1029.2  | 7.1               | 3.1 |
| M06-2X/cc-pVDZ                    | 3574.5  | -13.6             | 1416.3  | 0.4               | 1020.9  | -1.2              | 2.7 |
| M06-2X/cc-pVTZ                    | 3609.6  | 21.5              | 1424.8  | 8.9               | 1028.1  | 6.0               | 3.2 |
| M06-2X/aug-cc-pVDZ                | 3572.4  | -15.7             | 1413.0  | -2.9              | 1019.0  | -3.1              | 3.4 |
| M06-2X/aug-cc-pVTZ                | 3609.6  | 21.5              | 1424.5  | 8.6               | 1027.9  | 5.8               | 3.2 |
| $\omega$ B97X-D/6-311G(d,p)       | 3592.6  | 4.5               | 1415.7  | -0.2              | 1022.0  | -0.1              | 3.8 |
| $\omega$ B97X-D/6-311+G(d,p)      | 3592.5  | 4.4               | 1415.6  | -0.3              | 1021.9  | -0.2              | 3.7 |
| $\omega$ B97X-D/6-311++G(d,p)     | 3594.3  | 6.3               | 1417.7  | 1.8               | 1023.2  | 1.1               | 4.7 |
| $\omega$ B97X-D/cc-pVDZ           | 3570.3  | -17.8             | 1409.3  | -6.6              | 1016.9  | -5.2              | 3.7 |
| $\omega$ B97X-D/cc-pVTZ           | 3614.7  | 26.6              | 1422.0  | 6.1               | 1027.0  | 4.9               | 3.5 |
| $\omega$ B97X-D/aug-cc-pVDZ       | 3572.8  | -15.3             | 1412.1  | -3.8              | 1018.6  | -3.5              | 2.9 |
| $\omega$ B97X-D/aug-cc-pVTZ       | 3615.1  | 27.0              | 1422.2  | 6.3               | 1027.2  | 5.1               | 3.5 |
| CCSD/cc-pVDZ                      | 3521.2  | -66.9             | 1394.6  | -21.3             | 1005.4  | -16.7             | 3.7 |
| CCSD(T)_ae/cc-pwCVTZ              | 3587.90 | 0.45 <sup>a</sup> | 1422.02 | 0.32 <sup>a</sup> | 1024.85 | 0.36 <sup>a</sup> |     |
| CCSD(T)_ae/cc-pwCVQZ, $X_e^{B0b}$ | 3599.31 | 0.13 <sup>a</sup> | 1424.81 | 0.12 <sup>a</sup> | 1027.22 | 0.13 <sup>a</sup> |     |
| Experimental ( $X_o$ )            | 3588.05 |                   | 1415.91 |                   | 1022.07 |                   |     |
| Semiexperimental ( $X_e^{SEc}$ )  | 3604.09 |                   | 1426.57 |                   | 1028.54 |                   |     |

<sup>a</sup> Deviation from semi-experimental equilibrium rotational constant  $X_e^{SE}$  in %.

<sup>b</sup> Rotational constants of the  $r_e^{B0}$  structure, i.e. of CCSD(T)\_ae/cc-pwCVQZ quality.

<sup>c</sup> Derived with the B2PLYP-D3/6-311+G(3df,2pd) anharmonic (cubic) force field.

**Table S-3b:** Equilibrium rotational constants,  $X_e$  ( $X = A, B, C$ ) of *anti*-2AT calculated at various levels of theory. The deviations  $\Delta X$  between the calculated and the ground state experimental values  $X_0$  are given in MHz. The relative deviations of the semi-experimental equilibrium structures with respect to  $X_e^{BO}$  are given in %.  $\Theta$  is the tilt angle of the acetyl group out of the thiophene plane, *i.e.* deviation of the angle  $\alpha$  from  $180^\circ$ . *Imag* stands for imaginary frequency.

| Method/Basis Set           | A /<br>MHz | $\Delta A$ /<br>MHz | B /<br>MHz | $\Delta B$ /<br>MHz | C /<br>MHz | $\Delta C$ /<br>MHz | $\Theta$ /<br>° | <i>Imag</i>    |
|----------------------------|------------|---------------------|------------|---------------------|------------|---------------------|-----------------|----------------|
| MP2/6-31G(d,p)             | 3529.8     | -25.6               | 1417.3     | -1.5                | 1017.6     | -3.1                | 0.01            | No             |
| MP2/6-31+G(d,p)            | 3525.7     | -29.7               | 1413.7     | -5.1                | 1016.7     | -4.0                | 4.91            | - <sup>a</sup> |
| MP2/6-31++G(d,p)           | 3524.7     | -30.7               | 1412.9     | -5.8                | 1017.6     | -3.1                | 5.70            | - <sup>a</sup> |
| MP2/6-311G(d,p)            | 3530.7     | -24.7               | 1416.9     | -1.8                | 1017.6     | -3.2                | 0.04            | No             |
| MP2/6-311+G(d,p)           | 3529.4     | -26.0               | 1415.4     | -3.3                | 1018.5     | -2.3                | 4.88            | - <sup>a</sup> |
| MP2/6-311++G(d,p)          | 3528.4     | -27.0               | 1414.7     | -4.0                | 1019.3     | -1.5                | 6.03            | - <sup>a</sup> |
| MP2/6-311G(df,pd)          | 3557.8     | 2.4                 | 1426.3     | 7.5                 | 1024.6     | 3.8                 | 0.02            | No             |
| MP2/6-311+G(df,pd)         | 3555.6     | 0.2                 | 1423.0     | 4.2                 | 1025.8     | 5.1                 | 6.32            | - <sup>a</sup> |
| MP2/6-311++G(df,pd)        | 3553.9     | -1.5                | 1422.8     | 4.0                 | 1026.6     | 5.9                 | 6.85            | - <sup>a</sup> |
| MP2/6-311G(2d,2p)          | 3539.3     | -50.4               | 1422.1     | 6.4                 | 1020.9     | -1.0                | 0.03            | No             |
| MP2/6-311+G(2d,2p)         | 3538.7     | -51.0               | 1422.7     | 7.0                 | 1021.1     | -0.7                | 0.01            | No             |
| MP2/6-311++G(2d,2p)        | 3538.8     | -50.9               | 1422.7     | 7.0                 | 1021.1     | -0.7                | 0.02            | No             |
| MP2/6-311G(2df,2pd)        | 3563.5     | -26.2               | 1431.2     | 15.5                | 1027.6     | 5.7                 | 0.01            | No             |
| MP2/6-311+G(2df,2pd)       | 3563.0     | -26.7               | 1431.1     | 15.4                | 1027.5     | 5.6                 | 0.00            | / <sup>b</sup> |
| MP2/6-311++G(2df,2pd)      | 3562.8     | -26.9               | 1431.1     | 15.4                | 1027.5     | 5.6                 | 0.00            | / <sup>b</sup> |
| MP2/6-311G(3df,3pd)        | 3571.1     | 15.7                | 1431.7     | 13.0                | 1028.5     | 7.7                 | 0.01            | No             |
| MP2/6-311+G(3df,3pd)       | 3568.6     | 13.2                | 1431.8     | 13.0                | 1028.3     | 7.5                 | 0.04            | No             |
| MP2/6-311++G(3df,3pd)      | 3568.6     | 13.1                | 1431.8     | 13.0                | 1028.3     | 7.5                 | 0.03            | No             |
| MP2/cc-pVDZ                | 3491.0     | -64.5               | 1404.1     | -14.7               | 1007.7     | -13.0               | 0.04            | No             |
| MP2/cc-pVTZ                | 3554.8     | -0.6                | 1427.8     | 9.0                 | 1025.1     | 4.3                 | 0.02            | No             |
| MP2/aug-cc-pVDZ            | 3484.7     | -70.8               | 1404.0     | -14.7               | 1007.2     | -13.6               | 0.05            | No             |
| MP2/aug-cc-pVTZ            | 3553.9     | -1.5                | 1428.4     | 9.6                 | 1025.3     | 4.6                 | 0.03            | / <sup>b</sup> |
| B3LYP-D3/6-31G(d,p)        | 3510.9     | -78.7               | 1404.8     | -10.9               | 1009.6     | -12.2               | 0.00            | No             |
| B3LYP-D3/6-31+G(d,p)       | 3509.3     | -80.4               | 1402.9     | -12.8               | 1008.5     | -13.3               | 0.00            | No             |
| B3LYP-D3/6-31++G(d,p)      | 3509.3     | -80.3               | 1402.9     | -12.8               | 1008.5     | -13.3               | 0.00            | No             |
| B3LYP-D3/6-311G(d,p)       | 3523.7     | -66.0               | 1407.3     | -8.4                | 1012.0     | -9.9                | 0.01            | No             |
| B3LYP-D3/6-311+G(d,p)      | 3524.2     | -65.4               | 1407.3     | -8.4                | 1012.0     | -9.9                | 0.01            | No             |
| B3LYP-D3/6-311++G(d,p)     | 3524.1     | -65.5               | 1407.3     | -8.4                | 1012.0     | -9.9                | 0.01            | No             |
| B3LYP-D3/6-311G(df,pd)     | 3535.6     | -54.1               | 1411.3     | -4.4                | 1015.0     | -6.9                | 0.03            | No             |
| B3LYP-D3/6-311+G(df,pd)    | 3536.0     | -53.6               | 1411.4     | -4.4                | 1015.1     | -6.8                | 0.03            | No             |
| B3LYP-D3/6-311++G(df,pd)   | 3536.0     | -53.7               | 1411.4     | -4.3                | 1015.1     | -6.8                | 0.03            | No             |
| B3LYP-D3/6-311G(3df,3pd)   | 3560.3     | -29.3               | 1416.6     | 0.9                 | 1019.8     | -2.1                | 0.04            | No             |
| B3LYP-D3/6-311+G(3df,3pd)  | 3558.6     | -31.1               | 1417.2     | 1.4                 | 1019.9     | -2.0                | 0.04            | No             |
| B3LYP-D3/6-311++G(3df,3pd) | 3558.5     | -31.2               | 1417.1     | 1.4                 | 1019.9     | -2.0                | 0.04            | No             |
| B3LYP-D3/cc-pVDZ           | 3499.7     | -89.9               | 1401.8     | -13.9               | 1007.2     | -14.6               | 0.01            | No             |
| B3LYP-D3/cc-pVTZ           | 3547.7     | -42.0               | 1414.2     | -1.5                | 1017.5     | -4.4                | 0.03            | No             |

|                                  |        |       |        |       |        |       |      |              |
|----------------------------------|--------|-------|--------|-------|--------|-------|------|--------------|
| B3LYP-D3/aug-cc-pVDZ             | 3502.9 | -86.7 | 1401.6 | -14.1 | 1007.4 | -14.5 | 0.01 | No           |
| B3LYP-D3/aug-cc-pVTZ             | 3548.0 | -41.6 | 1414.5 | -1.2  | 1017.7 | -4.2  | 0.03 | No           |
| B3LYP-D3/6-311G(2d,2p)           | 3542.0 | -47.7 | 1411.8 | -3.9  | 1015.8 | -6.1  | 0.01 | No           |
| B3LYP-D3/6-311+G(2d,2p)          | 3542.2 | -47.5 | 1412.5 | -3.2  | 1016.1 | -5.7  | 0.02 | No           |
| B3LYP-D3/6-311++G(2d,2p)         | 3542.1 | -47.6 | 1412.5 | -3.2  | 1016.2 | -5.7  | 0.02 | No           |
| B3LYP-D3/6-311G(2df,2pd)         | 3552.5 | -37.2 | 1414.8 | -0.9  | 1018.2 | -3.7  | 0.01 | No           |
| B3LYP-D3/6-311+G(2df,2pd)        | 3552.8 | -36.8 | 1415.2 | -0.5  | 1018.4 | -3.4  | 0.05 | No           |
| B3LYP-D3/6-311++G(2df,2pd)       | 3552.7 | -36.9 | 1415.3 | -0.4  | 1018.5 | -3.4  | 0.04 | No           |
| B3LYP-D3BJ/6-31G(d,p)            | 3513.6 | -41.8 | 1410.0 | -8.8  | 1012.5 | -8.2  | 0.01 | No           |
| B3LYP-D3BJ/6-31+G(d,p)           | 3512.2 | -43.2 | 1408.1 | -10.6 | 1011.5 | -9.3  | 0.04 | No           |
| B3LYP-D3BJ/6-31++G(d,p)          | 3512.2 | -43.2 | 1408.1 | -10.7 | 1011.4 | -9.3  | 0.02 | No           |
| B3LYP-D3BJ/6-311G(d,p)           | 3526.5 | -28.9 | 1412.5 | -6.3  | 1014.9 | -5.9  | 0.01 | No           |
| B3LYP-D3BJ/6-311+G(d,p)          | 3526.9 | -28.5 | 1412.6 | -6.2  | 1015.0 | -5.8  | 0.00 | <sup>b</sup> |
| B3LYP-D3BJ/6-311++G(d,p)         | 3526.8 | -28.6 | 1412.6 | -6.2  | 1015.0 | -5.8  | 0.00 | No           |
| B3LYP-D3BJ/6-311G(df,pd)         | 3538.0 | -17.5 | 1416.6 | -2.1  | 1018.0 | -2.8  | 0.03 | No           |
| B3LYP-D3BJ/6-311+G(df,pd)        | 3538.6 | -16.8 | 1416.7 | -2.1  | 1018.0 | -2.7  | 0.03 | No           |
| B3LYP-D3BJ/6-311++G(df,pd)       | 3538.6 | -16.9 | 1416.7 | -2.0  | 1018.1 | -2.7  | 0.02 | No           |
| B3LYP-D3BJ/6-311G(3df,3pd)       | 3562.3 | 6.8   | 1422.0 | 3.3   | 1022.7 | 2.0   | 0.03 | No           |
| B3LYP-D3BJ/6-311+G(3df,3pd)      | 3561.0 | 5.6   | 1422.5 | 3.8   | 1022.9 | 2.1   | 0.01 | No           |
| B3LYP-D3BJ/6-311++G(3df,3pd)     | 3560.9 | 5.5   | 1422.6 | 3.9   | 1022.9 | 2.2   | 0.06 | No           |
| B3LYP-D3BJ/cc-pVDZ               | 3502.5 | -52.9 | 1407.1 | -11.6 | 1010.2 | -10.6 | 0.01 | No           |
| B3LYP-D3BJ/cc-pVTZ               | 3550.4 | -5.0  | 1419.6 | 0.8   | 1020.5 | -0.3  | 0.03 | No           |
| B3LYP-D3BJ/aug-cc-pVDZ           | 3505.9 | -49.5 | 1407.1 | -11.7 | 1010.4 | -10.3 | 0.04 | No           |
| B3LYP-D3BJ/aug-cc-pVTZ           | 3550.9 | -4.6  | 1419.9 | 1.1   | 1020.7 | -0.1  | 0.02 | No           |
| B3LYP-D3BJ/6-311G(2d,2p)         | 3544.4 | -45.3 | 1417.1 | 1.4   | 1018.7 | -3.1  | 0.02 | No           |
| B3LYP-D3BJ/6-311+G(2d,2p)        | 3544.7 | -45.0 | 1417.8 | 2.1   | 1019.1 | -2.8  | 0.02 | No           |
| B3LYP-D3BJ/6-311++G(2d,2p)       | 3544.6 | -45.1 | 1417.9 | 2.1   | 1019.1 | -2.8  | 0.01 | No           |
| B3LYP-D3BJ/6-311G(2df,2pd)       | 3554.5 | -35.1 | 1420.1 | 4.4   | 1021.1 | -0.8  | 0.02 | No           |
| B3LYP-D3BJ/6-311+G(2df,2pd)      | 3555.0 | -34.6 | 1420.5 | 4.8   | 1021.4 | -0.5  | 0.01 | No           |
| B3LYP-D3BJ/6-311++G(2df,2pd)     | 3554.9 | -34.7 | 1420.6 | 4.8   | 1021.4 | -0.5  | 0.01 | No           |
| CAM-B3LYP-D3BJ/6-311G(d,p)       | 3564.2 | -25.4 | 1421.5 | 5.8   | 1022.7 | 0.8   | 0.02 | No           |
| CAM-B3LYP-D3BJ/6-311+G(d,p)      | 3564.8 | -24.9 | 1421.6 | 5.9   | 1022.7 | 0.9   | 0.01 | No           |
| CAM-B3LYP-D3BJ/<br>6-311++G(d,p) | 3564.8 | -24.9 | 1421.6 | 5.9   | 1022.7 | 0.9   | 0.02 | No           |
| CAM-B3LYP-D3BJ/cc-pVDZ           | 3543.7 | -45.9 | 1415.7 | 0.0   | 1018.0 | -3.8  | 0.01 | No           |
| CAM-B3LYP-D3BJ/cc-pVTZ           | 3588.6 | -1.1  | 1428.8 | 13.1  | 1028.4 | 6.5   | 0.00 | No           |
| CAM-B3LYP-D3BJ/aug-cc-pVDZ       | 3540.0 | -49.7 | 1415.9 | 0.2   | 1017.8 | -4.0  | 0.02 | No           |
| CAM-B3LYP-D3BJ/aug-cc-pVTZ       | 3588.1 | -1.5  | 1428.6 | 12.9  | 1028.2 | 6.4   | 0.00 | No           |
| M06-2X/6-31G(d,p)                | 3547.2 | -8.2  | 1420.5 | 1.7   | 1020.7 | 0.0   | 0.01 | No           |
| M06-2X/6-31+G(d,p)               | 3546.0 | -9.5  | 1418.6 | -0.1  | 1019.7 | -1.1  | 0.02 | No           |
| M06-2X/6-31++G(d,p)              | 3546.0 | -9.4  | 1418.7 | -0.1  | 1019.7 | -1.1  | 0.02 | No           |
| M06-2X/6-311G(d,p)               | 3557.4 | 2.0   | 1422.6 | 3.8   | 1022.7 | 1.9   | 0.01 | No           |
| M06-2X/6-311+G(d,p)              | 3558.2 | 2.8   | 1422.5 | 3.7   | 1022.7 | 1.9   | 0.00 | No           |
| M06-2X/6-311++G(d,p)             | 3558.2 | 2.7   | 1422.5 | 3.8   | 1022.7 | 1.9   | 0.01 | No           |
| M06-2X/6-311G(df,pd)             | 3567.4 | 11.9  | 1425.8 | 7.0   | 1025.1 | 4.4   | 0.03 | No           |
| M06-2X/6-311+G(df,pd)            | 3568.3 | 12.9  | 1425.6 | 6.8   | 1025.1 | 4.3   | 0.00 | No           |
| M06-2X/6-311++G(df,pd)           | 3568.3 | 12.9  | 1425.7 | 6.9   | 1025.1 | 4.4   | 0.01 | No           |

|                                                      |         |       |         |       |         |       |      |              |
|------------------------------------------------------|---------|-------|---------|-------|---------|-------|------|--------------|
| M06-2X/6-311G(3df,3pd)                               | 3590.0  | 34.6  | 1430.5  | 11.7  | 1029.4  | 8.6   | 0.03 | No           |
| M06-2X/6-311+G(3df,3pd)                              | 3588.8  | 33.4  | 1431.0  | 12.3  | 1029.6  | 8.8   | 0.05 | No           |
| M06-2X/6-311++G(3df,3pd)                             | 3588.8  | 33.3  | 1431.0  | 12.2  | 1029.6  | 8.8   | 0.05 | No           |
| M06-2X/cc-pVDZ                                       | 3538.9  | -16.5 | 1418.1  | -0.7  | 1018.9  | -1.9  | 0.02 | No           |
| M06-2X/cc-pVTZ                                       | 3580.1  | 24.7  | 1429.4  | 10.6  | 1028.0  | 7.2   | 0.04 | No           |
| M06-2X/aug-cc-pVDZ                                   | 3542.6  | -12.8 | 1417.6  | -1.2  | 1018.9  | -1.9  | 0.03 | No           |
| M06-2X/aug-cc-pVTZ                                   | 3581.0  | 25.6  | 1429.6  | 10.8  | 1028.2  | 7.4   | 0.01 | No           |
| $\omega$ B97X-D/6-311G(d,p)                          | 3560.2  | -29.5 | 1417.8  | 2.1   | 1020.4  | -1.4  | 0.02 | No           |
| $\omega$ B97X-D/6-311+G(d,p)                         | 3560.1  | -29.6 | 1417.8  | 2.1   | 1020.4  | -1.4  | 0.02 | No           |
| $\omega$ B97X-D/6-311++G(d,p)                        | 3559.4  | -30.3 | 1417.9  | 2.1   | 1020.4  | -1.5  | 0.00 | No           |
| $\omega$ B97X-D/cc-pVDZ                              | 3539.8  | -49.8 | 1412.1  | -3.7  | 1015.8  | -6.0  | 0.01 | No           |
| $\omega$ B97X-D/cc-pVTZ                              | 3584.6  | -5.1  | 1424.8  | 9.1   | 1026.0  | 4.2   | 0.01 | No           |
| $\omega$ B97X-D/aug-cc-pVDZ                          | 3536.0  | -53.6 | 1411.6  | -4.1  | 1015.3  | -6.5  | 0.04 | No           |
| $\omega$ B97X-D/aug-cc-pVTZ                          | 3584.0  | -5.7  | 1424.4  | 8.7   | 1025.7  | 3.9   | 0.01 | No           |
| CCSD/cc-pVDZ                                         | 3484.8  | -70.7 | 1395.1  | -23.6 | 1002.6  | -18.2 | 0.06 | <sup>b</sup> |
| CCSD(T)_ae/cc-pwCVTZ                                 | 3558.77 |       | 1424.67 |       | 1023.82 |       |      |              |
| CCSD(T)_ae/cc-pwCVQZ, $X_e^{\text{BO}}$ <sup>c</sup> | 3570.61 |       | 1428.09 |       | 1026.56 |       |      |              |
| Experimental ( $X_0$ )                               | 3555.44 |       | 1418.76 |       | 1020.77 |       |      |              |

<sup>a</sup> Non-planar structure.

<sup>b</sup> No frequency calculations.

<sup>c</sup> Rotational constants of the  $r_e^{\text{BO}}$  structure, i.e. of CCSD(T)\_ae/cc-pwCVQZ quality.



**Table S-4a:** Coefficients of the one-dimensional Fourier expansion for the potential energy curves of *syn*-2AT given in Figure 3 calculated at the MP2 and B3LYP-D3BJ/6-311++G(d,p) levels of theory. The potential is expanded as  $V(\varphi) = \sum_{i=0}^2 a_i f_i$ .

| <i>i</i> | $f_i$          | MP2             |                          | B3LYP-D3BJ      |                          |
|----------|----------------|-----------------|--------------------------|-----------------|--------------------------|
|          |                | $a_i$ / Hartree | $a_i$ / cm <sup>-1</sup> | $a_i$ / Hartree | $a_i$ / cm <sup>-1</sup> |
| 0        | 1              | -704.3341292    |                          | -705.7929932    |                          |
| 1        | cos 3 $\alpha$ | 0.0007304       | 160.3                    | 0.0004994       | 109.6                    |
| 2        | cos 6 $\alpha$ | 0.0000291       | 6.4                      | 0.0000117       | 2.6                      |

**Table S-4b:** Coefficients of the one-dimensional Fourier expansion for the potential energy curves of *anti*-2AT given in Figure 3 calculated at the MP2 and B3LYP-D3BJ/6-311++G(d,p) levels of theory. The potential is expanded as  $V(\varphi) = \sum_{i=0}^5 a_i f_i$ .

| <i>i</i> | $f_i$           | MP2             |                          | B3LYP-D3BJ      |                          |
|----------|-----------------|-----------------|--------------------------|-----------------|--------------------------|
|          |                 | $a_i$ / Hartree | $a_i$ / cm <sup>-1</sup> | $a_i$ / Hartree | $a_i$ / cm <sup>-1</sup> |
| 0        | 1               | -704.3324313    |                          | -705.7919055    |                          |
| 1        | cos 3 $\alpha$  | 0.0006596       | 144.8                    | 0.0004413       | 96.9                     |
| 2        | cos 6 $\alpha$  | 0.0000929       | 20.4                     | 0.0000353       | 7.7                      |
| 3        | cos 9 $\alpha$  | -0.0000267      | -5.9                     |                 |                          |
| 4        | cos 12 $\alpha$ | 0.0000202       | 4.4                      |                 |                          |
| 5        | cos 15 $\alpha$ | -0.0000137      | -3.0                     |                 |                          |

**Table S-5:** Observed frequencies  $\nu_{obs}$  of 312 rotational transitions of *syn*-2AT with  $\nu_{obs}-\nu_{calc}$  values obtained from a fit with the program *XIAM*.

| No. | <i>J</i>    | <i>K<sub>a</sub></i> | <i>K<sub>c</sub></i> | <i>J</i>    | <i>K<sub>a</sub></i> | <i>K<sub>c</sub></i> | Species | $\nu_{obs}$ | $\nu_{obs}-\nu_{calc}$ |
|-----|-------------|----------------------|----------------------|-------------|----------------------|----------------------|---------|-------------|------------------------|
|     | upper level |                      |                      | lower level |                      |                      |         | MHz         | kHz                    |
| 1   | 1           | 0                    | 1                    | 0           | 0                    | 0                    | E       | 2437.9540   | 0.3                    |
| 2   | 2           | 0                    | 2                    | 1           | 0                    | 1                    | A       | 4827.2215   | -1.0                   |
| 3   | 2           | 0                    | 2                    | 1           | 0                    | 1                    | E       | 4827.0671   | -0.3                   |
| 4   | 3           | 0                    | 3                    | 2           | 0                    | 2                    | A       | 7123.4746   | -2.5                   |
| 5   | 3           | 0                    | 3                    | 2           | 0                    | 2                    | E       | 7123.2863   | 1.1                    |
| 6   | 4           | 0                    | 4                    | 3           | 0                    | 3                    | A       | 9302.9890   | -3.9                   |
| 7   | 4           | 0                    | 4                    | 3           | 0                    | 3                    | E       | 9302.7953   | 3.0                    |
| 8   | 5           | 0                    | 5                    | 4           | 0                    | 4                    | A       | 11380.1607  | -4.1                   |
| 9   | 5           | 0                    | 5                    | 4           | 0                    | 4                    | E       | 11379.9751  | 4.1                    |
| 10  | 6           | 0                    | 6                    | 5           | 0                    | 5                    | A       | 13399.7133  | -13.6                  |
| 11  | 6           | 0                    | 6                    | 5           | 0                    | 5                    | E       | 13399.5483  | 5.4                    |
| 12  | 7           | 0                    | 7                    | 6           | 0                    | 6                    | A       | 15404.1691  | -7.0                   |
| 13  | 7           | 0                    | 7                    | 6           | 0                    | 6                    | E       | 15404.0070  | 7.3                    |
| 14  | 8           | 0                    | 8                    | 7           | 0                    | 7                    | A       | 17414.7711  | -7.3                   |
| 15  | 8           | 0                    | 8                    | 7           | 0                    | 7                    | E       | 17414.6140  | 7.4                    |
| 16  | 9           | 0                    | 9                    | 8           | 0                    | 8                    | A       | 19436.1880  | -9.3                   |
| 17  | 9           | 0                    | 9                    | 8           | 0                    | 8                    | E       | 19436.0369  | 9.1                    |
| 18  | 10          | 0                    | 10                   | 9           | 0                    | 9                    | A       | 21466.4740  | -9.8                   |
| 19  | 10          | 0                    | 10                   | 9           | 0                    | 9                    | E       | 21466.3247  | 9.3                    |
| 20  | 11          | 0                    | 11                   | 10          | 0                    | 10                   | A       | 23502.6037  | -10.1                  |
| 21  | 11          | 0                    | 11                   | 10          | 0                    | 10                   | E       | 23502.4568  | 10.7                   |
| 22  | 3           | 0                    | 3                    | 2           | 1                    | 2                    | A       | 5296.1503   | -3.8                   |
| 23  | 3           | 0                    | 3                    | 2           | 1                    | 2                    | E       | 5296.3490   | -0.7                   |
| 24  | 4           | 0                    | 4                    | 3           | 1                    | 3                    | A       | 7904.6992   | -2.7                   |
| 25  | 4           | 0                    | 4                    | 3           | 1                    | 3                    | E       | 7904.7240   | -0.6                   |
| 26  | 5           | 0                    | 5                    | 4           | 1                    | 4                    | A       | 10407.7568  | -3.5                   |
| 27  | 5           | 0                    | 5                    | 4           | 1                    | 4                    | E       | 10407.6918  | 2.2                    |
| 28  | 6           | 0                    | 6                    | 5           | 1                    | 5                    | A       | 12779.7295  | -4.7                   |
| 29  | 6           | 0                    | 6                    | 5           | 1                    | 5                    | E       | 12779.6164  | 3.5                    |
| 30  | 7           | 0                    | 7                    | 6           | 1                    | 6                    | A       | 15035.6542  | -5.9                   |
| 31  | 7           | 0                    | 7                    | 6           | 1                    | 6                    | E       | 15035.5186  | 5.7                    |
| 32  | 8           | 0                    | 8                    | 7           | 1                    | 7                    | A       | 17206.9112  | -6.5                   |
| 33  | 8           | 0                    | 8                    | 7           | 1                    | 7                    | E       | 17206.7643  | 6.2                    |
| 34  | 9           | 0                    | 9                    | 8           | 1                    | 8                    | A       | 19323.3404  | -8.5                   |
| 35  | 9           | 0                    | 9                    | 8           | 1                    | 8                    | E       | 19323.1915  | 7.6                    |
| 36  | 10          | 0                    | 10                   | 9           | 1                    | 9                    | A       | 21406.9184  | -9.4                   |
| 37  | 10          | 0                    | 10                   | 9           | 1                    | 9                    | E       | 21406.7700  | 9.2                    |
| 38  | 11          | 0                    | 11                   | 10          | 1                    | 10                   | A       | 23471.8440  | -11.9                  |
| 39  | 11          | 0                    | 11                   | 10          | 1                    | 10                   | E       | 23471.6982  | 9.9                    |
| 40  | 1           | 1                    | 0                    | 0           | 0                    | 0                    | E       | 5004.3114   | 0.9                    |
| 41  | 1           | 1                    | 1                    | 0           | 0                    | 0                    | E       | 4609.5096   | 0.4                    |
| 42  | 2           | 1                    | 2                    | 1           | 0                    | 1                    | E       | 6654.0054   | 2.5                    |

|    |    |   |    |    |   |    |   |            |       |
|----|----|---|----|----|---|----|---|------------|-------|
| 43 | 3  | 1 | 3  | 2  | 0 | 2  | A | 8521.7650  | -3.1  |
| 44 | 3  | 1 | 3  | 2  | 0 | 2  | E | 8521.3570  | 4.0   |
| 45 | 4  | 1 | 4  | 3  | 0 | 3  | A | 10275.3962 | -1.3  |
| 46 | 4  | 1 | 4  | 3  | 0 | 3  | E | 10275.0790 | 5.3   |
| 47 | 5  | 1 | 5  | 4  | 0 | 4  | A | 12000.1534 | -4.1  |
| 48 | 5  | 1 | 5  | 4  | 0 | 4  | E | 11999.9072 | 6.2   |
| 49 | 6  | 1 | 6  | 5  | 0 | 5  | A | 13768.2355 | -7.4  |
| 50 | 6  | 1 | 6  | 5  | 0 | 5  | E | 13768.0371 | 7.3   |
| 51 | 7  | 1 | 7  | 6  | 0 | 6  | A | 15612.0298 | -7.1  |
| 52 | 7  | 1 | 7  | 6  | 0 | 6  | E | 15611.8559 | 7.7   |
| 53 | 8  | 1 | 8  | 7  | 0 | 7  | A | 17527.6193 | -7.6  |
| 54 | 8  | 1 | 8  | 7  | 0 | 7  | E | 17527.4585 | 8.1   |
| 55 | 9  | 1 | 9  | 8  | 0 | 8  | A | 19495.7441 | -9.1  |
| 56 | 9  | 1 | 9  | 8  | 0 | 8  | E | 19495.5914 | 9.0   |
| 57 | 10 | 1 | 10 | 9  | 0 | 9  | A | 21497.2314 | -10.3 |
| 58 | 10 | 1 | 10 | 9  | 0 | 9  | E | 21497.0822 | 9.0   |
| 59 | 11 | 1 | 11 | 10 | 0 | 10 | A | 23518.2188 | -11.2 |
| 60 | 11 | 1 | 11 | 10 | 0 | 10 | E | 23518.0728 | 10.3  |
| 61 | 1  | 1 | 0  | 1  | 0 | 1  | E | 2566.3579  | 1.1   |
| 62 | 3  | 1 | 2  | 3  | 0 | 3  | A | 3757.7619  | 5.4   |
| 63 | 3  | 1 | 2  | 3  | 0 | 3  | E | 3757.2974  | 2.9   |
| 64 | 5  | 1 | 4  | 5  | 0 | 5  | E | 6422.8475  | -5.2  |
| 65 | 6  | 1 | 5  | 6  | 0 | 6  | A | 8336.8132  | 1.1   |
| 66 | 7  | 1 | 6  | 7  | 0 | 7  | A | 10516.5378 | 2.3   |
| 67 | 7  | 1 | 6  | 7  | 0 | 7  | E | 10514.6282 | -10.2 |
| 68 | 8  | 1 | 7  | 8  | 0 | 8  | A | 12827.2192 | 6.7   |
| 69 | 8  | 1 | 7  | 8  | 0 | 8  | E | 12824.8940 | -12.4 |
| 70 | 9  | 1 | 8  | 9  | 0 | 9  | A | 15152.1496 | 11.2  |
| 71 | 9  | 1 | 8  | 9  | 0 | 9  | E | 15149.4339 | -12.3 |
| 72 | 4  | 1 | 3  | 3  | 1 | 2  | A | 10429.9204 | -1.7  |
| 73 | 4  | 1 | 3  | 3  | 1 | 2  | E | 10429.4559 | 0.4   |
| 74 | 5  | 1 | 4  | 4  | 1 | 3  | A | 12919.4037 | -2.3  |
| 75 | 5  | 1 | 4  | 4  | 1 | 3  | E | 12918.8666 | 0.6   |
| 76 | 6  | 1 | 5  | 5  | 1 | 4  | A | 15312.6086 | -3.4  |
| 77 | 6  | 1 | 5  | 5  | 1 | 4  | E | 15312.0272 | 1.5   |
| 78 | 7  | 1 | 6  | 6  | 1 | 5  | A | 17583.8957 | -3.8  |
| 79 | 7  | 1 | 6  | 6  | 1 | 5  | E | 17583.3068 | 4.1   |
| 80 | 8  | 1 | 7  | 7  | 1 | 6  | A | 19725.4501 | -5.4  |
| 81 | 8  | 1 | 7  | 7  | 1 | 6  | E | 19724.8811 | 6.5   |
| 82 | 10 | 1 | 9  | 9  | 1 | 8  | A | 23738.9975 | -8.5  |
| 83 | 10 | 1 | 9  | 9  | 1 | 8  | E | 23738.4825 | 10.2  |
| 84 | 2  | 1 | 2  | 1  | 1 | 1  | A | 4482.1968  | -2.5  |
| 85 | 2  | 1 | 2  | 1  | 1 | 1  | E | 4482.4490  | 1.5   |
| 86 | 3  | 1 | 3  | 2  | 1 | 2  | A | 6694.4419  | -3.2  |
| 87 | 3  | 1 | 3  | 2  | 1 | 2  | E | 6694.4195  | 2.1   |
| 88 | 4  | 1 | 4  | 3  | 1 | 3  | A | 8877.1025  | -4.0  |
| 89 | 4  | 1 | 4  | 3  | 1 | 3  | E | 8877.0099  | 4.0   |

|            |    |   |    |    |   |    |   |            |       |
|------------|----|---|----|----|---|----|---|------------|-------|
| <b>90</b>  | 5  | 1 | 5  | 4  | 1 | 4  | A | 11027.7511 | -1.8  |
| <b>91</b>  | 5  | 1 | 5  | 4  | 1 | 4  | E | 11027.6239 | 4.3   |
| <b>92</b>  | 6  | 1 | 6  | 5  | 1 | 5  | A | 13148.2441 | -6.1  |
| <b>93</b>  | 6  | 1 | 6  | 5  | 1 | 5  | E | 13148.1048 | 5.0   |
| <b>94</b>  | 7  | 1 | 7  | 6  | 1 | 6  | A | 15243.5140 | -6.9  |
| <b>95</b>  | 7  | 1 | 7  | 6  | 1 | 6  | E | 15243.3677 | 6.4   |
| <b>96</b>  | 8  | 1 | 8  | 7  | 1 | 7  | A | 17319.7588 | -7.3  |
| <b>97</b>  | 8  | 1 | 8  | 7  | 1 | 7  | E | 17319.6090 | 7.0   |
| <b>98</b>  | 9  | 1 | 9  | 8  | 1 | 8  | A | 19382.8962 | -8.6  |
| <b>99</b>  | 9  | 1 | 9  | 8  | 1 | 8  | E | 19382.7469 | 8.4   |
| <b>100</b> | 10 | 1 | 10 | 9  | 1 | 9  | A | 21437.6760 | -9.8  |
| <b>101</b> | 10 | 1 | 10 | 9  | 1 | 9  | E | 21437.5281 | 9.5   |
| <b>102</b> | 11 | 1 | 11 | 10 | 1 | 10 | A | 23487.4617 | -10.4 |
| <b>103</b> | 11 | 1 | 11 | 10 | 1 | 10 | E | 23487.3157 | 11.0  |
| <b>104</b> | 5  | 1 | 4  | 4  | 2 | 3  | A | 7676.4351  | -2.2  |
| <b>105</b> | 5  | 1 | 4  | 4  | 2 | 3  | E | 7677.7043  | -1.4  |
| <b>106</b> | 6  | 1 | 5  | 5  | 2 | 4  | A | 10907.2980 | -1.8  |
| <b>107</b> | 6  | 1 | 5  | 5  | 2 | 4  | E | 10907.7288 | -2.2  |
| <b>108</b> | 7  | 1 | 6  | 6  | 2 | 5  | A | 14080.5150 | -1.9  |
| <b>109</b> | 7  | 1 | 6  | 6  | 2 | 5  | E | 14080.5225 | -0.9  |
| <b>110</b> | 8  | 1 | 7  | 7  | 2 | 6  | A | 17110.0454 | -1.5  |
| <b>111</b> | 8  | 1 | 7  | 7  | 2 | 6  | E | 17109.8106 | 0.8   |
| <b>112</b> | 9  | 1 | 8  | 8  | 2 | 7  | A | 19935.9232 | -2.3  |
| <b>113</b> | 9  | 1 | 8  | 8  | 2 | 7  | E | 19935.5532 | 3.3   |
| <b>114</b> | 3  | 2 | 1  | 2  | 0 | 2  | A | 17079.6166 | -2.8  |
| <b>115</b> | 3  | 2 | 1  | 2  | 0 | 2  | E | 17081.0777 | 3.4   |
| <b>116</b> | 4  | 2 | 2  | 3  | 0 | 3  | A | 20119.0534 | -4.0  |
| <b>117</b> | 4  | 2 | 2  | 3  | 0 | 3  | E | 20118.2935 | 5.2   |
| <b>118</b> | 2  | 2 | 1  | 2  | 0 | 2  | A | 9525.9979  | -4.4  |
| <b>119</b> | 2  | 2 | 1  | 2  | 0 | 2  | E | 9512.1209  | -3.4  |
| <b>120</b> | 3  | 2 | 2  | 3  | 0 | 3  | A | 9716.6417  | -0.9  |
| <b>121</b> | 3  | 2 | 2  | 3  | 0 | 3  | E | 9712.1397  | 2.5   |
| <b>122</b> | 4  | 2 | 3  | 4  | 0 | 4  | A | 10127.6535 | -1.0  |
| <b>123</b> | 4  | 2 | 3  | 4  | 0 | 4  | E | 10125.1195 | 1.5   |
| <b>124</b> | 5  | 2 | 4  | 5  | 0 | 5  | A | 10829.2383 | -0.8  |
| <b>125</b> | 5  | 2 | 4  | 5  | 0 | 5  | E | 10827.1467 | -0.7  |
| <b>126</b> | 2  | 2 | 1  | 2  | 1 | 2  | A | 7698.6793  | 0.0   |
| <b>127</b> | 2  | 2 | 1  | 2  | 1 | 2  | E | 7685.1898  | 1.0   |
| <b>128</b> | 3  | 2 | 2  | 3  | 1 | 3  | A | 8318.3561  | 4.6   |
| <b>129</b> | 3  | 2 | 2  | 3  | 1 | 3  | E | 8314.0688  | -0.7  |
| <b>130</b> | 4  | 2 | 3  | 4  | 1 | 4  | A | 9155.2571  | 7.2   |
| <b>131</b> | 4  | 2 | 3  | 4  | 1 | 4  | E | 9152.8351  | -1.5  |
| <b>132</b> | 5  | 2 | 4  | 5  | 1 | 5  | A | 10209.2552 | 8.7   |
| <b>133</b> | 5  | 2 | 4  | 5  | 1 | 5  | E | 10207.2155 | -1.9  |
| <b>134</b> | 6  | 2 | 5  | 6  | 1 | 6  | A | 11471.6896 | 10.9  |
| <b>135</b> | 6  | 2 | 5  | 6  | 1 | 6  | E | 11469.6234 | -4.5  |
| <b>136</b> | 7  | 2 | 6  | 7  | 1 | 7  | A | 12924.0871 | 3.8   |

|            |   |   |   |   |   |   |   |            |       |
|------------|---|---|---|---|---|---|---|------------|-------|
| <b>137</b> | 7 | 2 | 6 | 7 | 1 | 7 | E | 12921.8492 | -5.5  |
| <b>138</b> | 8 | 2 | 7 | 8 | 1 | 8 | A | 14539.5758 | 14.0  |
| <b>139</b> | 8 | 2 | 7 | 8 | 1 | 8 | E | 14537.0733 | -6.9  |
| <b>140</b> | 2 | 2 | 0 | 1 | 1 | 0 | E | 11846.6738 | -2.6  |
| <b>141</b> | 2 | 2 | 0 | 1 | 1 | 1 | A | 12229.7378 | 0.6   |
| <b>142</b> | 2 | 2 | 0 | 1 | 1 | 1 | E | 12241.4792 | 1.5   |
| <b>143</b> | 3 | 2 | 1 | 2 | 1 | 2 | A | 15252.2990 | 2.6   |
| <b>144</b> | 3 | 2 | 1 | 2 | 1 | 2 | E | 15254.1404 | 1.7   |
| <b>145</b> | 4 | 2 | 2 | 3 | 1 | 3 | E | 18720.2219 | 1.4   |
| <b>146</b> | 5 | 2 | 3 | 4 | 1 | 4 | E | 22731.9240 | 1.8   |
| <b>147</b> | 2 | 2 | 1 | 2 | 1 | 1 | E | 6503.4017  | -3.8  |
| <b>148</b> | 2 | 2 | 0 | 2 | 1 | 1 | A | 6565.8886  | -3.7  |
| <b>149</b> | 2 | 2 | 0 | 2 | 1 | 1 | E | 6577.2440  | -3.0  |
| <b>150</b> | 3 | 2 | 1 | 3 | 1 | 2 | A | 6198.3856  | -0.2  |
| <b>151</b> | 3 | 2 | 1 | 3 | 1 | 2 | E | 6200.4947  | 0.2   |
| <b>152</b> | 4 | 2 | 2 | 4 | 1 | 3 | A | 5931.3798  | 1.1   |
| <b>153</b> | 4 | 2 | 2 | 4 | 1 | 3 | E | 5931.5397  | 1.4   |
| <b>154</b> | 5 | 2 | 3 | 5 | 1 | 4 | A | 5901.7658  | -0.3  |
| <b>155</b> | 5 | 2 | 3 | 5 | 1 | 4 | E | 5901.3856  | 5.7   |
| <b>156</b> | 6 | 2 | 4 | 6 | 1 | 5 | A | 6219.5530  | 2.1   |
| <b>157</b> | 6 | 2 | 4 | 6 | 1 | 5 | E | 6218.9050  | 5.1   |
| <b>158</b> | 2 | 2 | 0 | 2 | 1 | 2 | E | 7759.0332  | 3.0   |
| <b>159</b> | 4 | 2 | 2 | 4 | 1 | 4 | E | 9843.2133  | -1.3  |
| <b>160</b> | 2 | 2 | 1 | 1 | 1 | 0 | A | 11786.9922 | -4.2  |
| <b>161</b> | 2 | 2 | 1 | 1 | 1 | 0 | E | 11772.8346 | -0.3  |
| <b>162</b> | 3 | 2 | 2 | 2 | 1 | 1 | A | 13831.1485 | -2.6  |
| <b>163</b> | 3 | 2 | 2 | 2 | 1 | 1 | E | 13826.7036 | 0.0   |
| <b>164</b> | 4 | 2 | 3 | 3 | 1 | 2 | A | 15672.8880 | -2.9  |
| <b>165</b> | 4 | 2 | 3 | 3 | 1 | 2 | E | 15670.6177 | 2.0   |
| <b>166</b> | 5 | 2 | 4 | 4 | 1 | 3 | A | 17324.7149 | -3.3  |
| <b>167</b> | 5 | 2 | 4 | 4 | 1 | 3 | E | 17323.1648 | 4.1   |
| <b>168</b> | 6 | 2 | 5 | 5 | 1 | 4 | A | 18815.9889 | -5.7  |
| <b>169</b> | 6 | 2 | 5 | 5 | 1 | 4 | E | 18814.8122 | 7.2   |
| <b>170</b> | 7 | 2 | 6 | 6 | 1 | 5 | A | 20199.3007 | -7.4  |
| <b>171</b> | 7 | 2 | 6 | 6 | 1 | 5 | E | 20198.3777 | 10.2  |
| <b>172</b> | 8 | 2 | 7 | 7 | 1 | 6 | A | 21550.6421 | -11.1 |
| <b>173</b> | 8 | 2 | 7 | 7 | 1 | 6 | E | 21549.9045 | 12.2  |
| <b>174</b> | 9 | 2 | 8 | 8 | 1 | 7 | A | 22954.8177 | -9.8  |
| <b>175</b> | 9 | 2 | 8 | 8 | 1 | 7 | E | 22954.2012 | 13.6  |
| <b>176</b> | 3 | 2 | 2 | 2 | 1 | 2 | E | 15008.4882 | 1.3   |
| <b>177</b> | 4 | 2 | 3 | 3 | 1 | 3 | E | 18029.8435 | 1.0   |
| <b>178</b> | 2 | 2 | 1 | 1 | 1 | 1 | E | 12167.6338 | -2.5  |
| <b>179</b> | 3 | 2 | 1 | 2 | 1 | 1 | E | 14072.3570 | 1.5   |
| <b>180</b> | 4 | 2 | 2 | 3 | 1 | 2 | E | 16360.9950 | 1.3   |
| <b>181</b> | 3 | 2 | 1 | 3 | 1 | 3 | E | 8559.7185  | -2.8  |
| <b>182</b> | 4 | 2 | 3 | 3 | 2 | 2 | A | 9714.0026  | -2.2  |
| <b>183</b> | 4 | 2 | 3 | 3 | 2 | 2 | E | 9715.7755  | 2.4   |

|            |   |   |   |   |   |   |   |            |      |
|------------|---|---|---|---|---|---|---|------------|------|
| <b>184</b> | 5 | 2 | 4 | 4 | 2 | 3 | A | 12081.7459 | -3.5 |
| <b>185</b> | 5 | 2 | 4 | 4 | 2 | 3 | E | 12082.0039 | 3.5  |
| <b>186</b> | 6 | 2 | 5 | 5 | 2 | 4 | A | 14410.6809 | -1.6 |
| <b>187</b> | 6 | 2 | 5 | 5 | 2 | 4 | E | 14410.5136 | 3.3  |
| <b>188</b> | 7 | 2 | 6 | 6 | 2 | 5 | A | 16695.9207 | -4.8 |
| <b>189</b> | 7 | 2 | 6 | 6 | 2 | 5 | E | 16695.5927 | 4.5  |
| <b>190</b> | 8 | 2 | 7 | 7 | 2 | 6 | A | 18935.2393 | -5.3 |
| <b>191</b> | 8 | 2 | 7 | 7 | 2 | 6 | E | 18934.8334 | 5.9  |
| <b>192</b> | 9 | 2 | 8 | 8 | 2 | 7 | A | 21129.6238 | -6.0 |
| <b>193</b> | 9 | 2 | 8 | 8 | 2 | 7 | E | 21129.1760 | 6.1  |
| <b>194</b> | 3 | 2 | 1 | 2 | 2 | 0 | A | 7504.7592  | 0.7  |
| <b>195</b> | 3 | 2 | 1 | 2 | 2 | 0 | E | 7495.1102  | 1.7  |
| <b>196</b> | 4 | 2 | 2 | 3 | 2 | 1 | A | 10162.9130 | -2.0 |
| <b>197</b> | 4 | 2 | 2 | 3 | 2 | 1 | E | 10160.5030 | 3.8  |
| <b>198</b> | 5 | 2 | 3 | 4 | 2 | 2 | A | 12889.7915 | -1.9 |
| <b>199</b> | 5 | 2 | 3 | 4 | 2 | 2 | E | 12888.7107 | 3.1  |
| <b>200</b> | 6 | 2 | 4 | 5 | 2 | 3 | A | 15630.3943 | -2.5 |
| <b>201</b> | 6 | 2 | 4 | 5 | 2 | 3 | E | 15629.5487 | 3.0  |
| <b>202</b> | 7 | 2 | 5 | 6 | 2 | 4 | A | 18329.3408 | -1.7 |
| <b>203</b> | 7 | 2 | 5 | 6 | 2 | 4 | E | 18328.4813 | 2.8  |
| <b>204</b> | 8 | 2 | 6 | 7 | 2 | 5 | A | 20948.4078 | -2.1 |
| <b>205</b> | 8 | 2 | 6 | 7 | 2 | 5 | E | 20947.4784 | 2.1  |
| <b>206</b> | 9 | 2 | 7 | 8 | 2 | 6 | A | 23461.1517 | -4.1 |
| <b>207</b> | 9 | 2 | 7 | 8 | 2 | 6 | E | 23460.1649 | 2.3  |
| <b>208</b> | 3 | 2 | 2 | 2 | 2 | 0 | E | 7249.4583  | 1.7  |
| <b>209</b> | 4 | 2 | 3 | 3 | 2 | 1 | E | 9470.1223  | 1.1  |
| <b>210</b> | 3 | 2 | 1 | 2 | 2 | 1 | E | 7568.9561  | 6.1  |
| <b>211</b> | 4 | 2 | 2 | 3 | 2 | 2 | E | 10406.1548 | 3.7  |
| <b>212</b> | 8 | 2 | 6 | 7 | 3 | 5 | A | 12086.5886 | 2.1  |
| <b>213</b> | 8 | 2 | 6 | 7 | 3 | 5 | E | 12089.1567 | 2.6  |
| <b>214</b> | 5 | 3 | 2 | 5 | 0 | 5 | E | 23184.9532 | -1.9 |
| <b>215</b> | 3 | 3 | 0 | 3 | 2 | 1 | A | 11639.5842 | -0.8 |
| <b>216</b> | 3 | 3 | 0 | 3 | 2 | 1 | E | 11674.4427 | -2.4 |
| <b>217</b> | 4 | 3 | 1 | 4 | 2 | 2 | A | 11338.8077 | 0.4  |
| <b>218</b> | 4 | 3 | 1 | 4 | 2 | 2 | E | 11366.2811 | -3.3 |
| <b>219</b> | 5 | 3 | 2 | 5 | 2 | 3 | A | 10848.5264 | -1.1 |
| <b>220</b> | 5 | 3 | 2 | 5 | 2 | 3 | E | 10860.7213 | -1.2 |
| <b>221</b> | 6 | 3 | 3 | 6 | 2 | 4 | A | 10220.4406 | 0.8  |
| <b>222</b> | 6 | 3 | 3 | 6 | 2 | 4 | E | 10224.0592 | -0.3 |
| <b>223</b> | 7 | 3 | 4 | 7 | 2 | 5 | A | 9580.7974  | 0.7  |
| <b>224</b> | 8 | 3 | 5 | 8 | 2 | 6 | E | 9094.5739  | 1.2  |
| <b>225</b> | 3 | 3 | 1 | 2 | 2 | 0 | A | 19140.5194 | -0.9 |
| <b>226</b> | 4 | 3 | 2 | 3 | 2 | 1 | A | 21475.1931 | -1.5 |
| <b>227</b> | 4 | 3 | 2 | 3 | 2 | 1 | E | 21439.8647 | 1.2  |
| <b>228</b> | 5 | 3 | 3 | 4 | 2 | 2 | A | 23634.0644 | -2.5 |
| <b>229</b> | 5 | 3 | 3 | 4 | 2 | 2 | E | 23616.7249 | 1.2  |
| <b>230</b> | 3 | 3 | 0 | 2 | 2 | 0 | E | 19169.5546 | 1.0  |

|            |   |   |   |   |   |   |   |            |      |
|------------|---|---|---|---|---|---|---|------------|------|
| <b>231</b> | 4 | 3 | 1 | 3 | 2 | 1 | E | 21526.7890 | 5.4  |
| <b>232</b> | 5 | 3 | 2 | 4 | 2 | 2 | E | 23749.4308 | 0.7  |
| <b>233</b> | 3 | 3 | 1 | 3 | 2 | 1 | E | 11591.2548 | 1.8  |
| <b>234</b> | 4 | 3 | 2 | 4 | 2 | 2 | E | 11279.3625 | -1.8 |
| <b>235</b> | 5 | 3 | 3 | 5 | 2 | 3 | E | 10728.0132 | -2.9 |
| <b>236</b> | 4 | 3 | 1 | 4 | 2 | 3 | E | 12056.6612 | -1.2 |
| <b>237</b> | 5 | 3 | 2 | 5 | 2 | 4 | E | 12357.8067 | -0.9 |
| <b>238</b> | 3 | 3 | 0 | 2 | 2 | 1 | A | 19193.2021 | -0.1 |
| <b>239</b> | 3 | 3 | 0 | 2 | 2 | 1 | E | 19243.3861 | -9.0 |
| <b>240</b> | 4 | 3 | 1 | 3 | 2 | 2 | A | 21741.2212 | -0.9 |
| <b>241</b> | 4 | 3 | 1 | 3 | 2 | 2 | E | 21772.4369 | 1.4  |
| <b>242</b> | 5 | 3 | 2 | 4 | 2 | 3 | A | 24426.7294 | -1.5 |
| <b>243</b> | 5 | 3 | 2 | 4 | 2 | 3 | E | 24439.8108 | 2.7  |
| <b>244</b> | 3 | 3 | 0 | 3 | 2 | 2 | E | 11920.0952 | -1.8 |
| <b>245</b> | 3 | 3 | 1 | 2 | 2 | 1 | E | 19160.2051 | 2.1  |
| <b>246</b> | 4 | 3 | 2 | 3 | 2 | 2 | E | 21685.5170 | 1.7  |
| <b>247</b> | 5 | 3 | 3 | 4 | 2 | 3 | E | 24307.1022 | 0.5  |
| <b>248</b> | 3 | 3 | 1 | 3 | 2 | 2 | A | 11875.2603 | -1.3 |
| <b>249</b> | 3 | 3 | 1 | 3 | 2 | 2 | E | 11836.9052 | 0.3  |
| <b>250</b> | 4 | 3 | 2 | 4 | 2 | 3 | A | 12000.6911 | 1.6  |
| <b>251</b> | 4 | 3 | 2 | 4 | 2 | 3 | E | 11969.7403 | -2.0 |
| <b>252</b> | 5 | 3 | 3 | 5 | 2 | 4 | A | 12240.7305 | 3.1  |
| <b>253</b> | 5 | 3 | 3 | 5 | 2 | 4 | E | 12225.0992 | -2.1 |
| <b>254</b> | 6 | 3 | 4 | 6 | 2 | 5 | A | 12633.5980 | 1.4  |
| <b>255</b> | 6 | 3 | 4 | 6 | 2 | 5 | E | 12626.5831 | -2.5 |
| <b>256</b> | 4 | 3 | 1 | 3 | 3 | 0 | A | 9862.1350  | -2.3 |
| <b>257</b> | 4 | 3 | 1 | 3 | 3 | 0 | E | 9852.3415  | 3.0  |
| <b>258</b> | 5 | 3 | 2 | 4 | 3 | 1 | A | 12399.5108 | -2.8 |
| <b>259</b> | 5 | 3 | 2 | 4 | 3 | 1 | E | 12383.1479 | 2.2  |
| <b>260</b> | 6 | 3 | 3 | 5 | 3 | 2 | A | 15002.3053 | -3.8 |
| <b>261</b> | 6 | 3 | 3 | 5 | 3 | 2 | E | 14992.8863 | 3.6  |
| <b>262</b> | 8 | 3 | 5 | 7 | 3 | 4 | A | 20462.4957 | -2.1 |
| <b>263</b> | 8 | 3 | 5 | 7 | 3 | 4 | E | 20460.5553 | 4.3  |
| <b>264</b> | 9 | 3 | 6 | 8 | 3 | 5 | A | 23288.7693 | -1.3 |
| <b>265</b> | 9 | 3 | 6 | 8 | 3 | 5 | E | 23287.3590 | 5.3  |
| <b>266</b> | 4 | 3 | 2 | 3 | 3 | 1 | A | 9839.4319  | -0.9 |
| <b>267</b> | 4 | 3 | 2 | 3 | 3 | 1 | E | 9848.6122  | 1.7  |
| <b>268</b> | 5 | 3 | 3 | 4 | 3 | 2 | A | 12321.7829 | -4.5 |
| <b>269</b> | 5 | 3 | 3 | 4 | 3 | 2 | E | 12337.3628 | 3.4  |
| <b>270</b> | 6 | 3 | 4 | 5 | 3 | 3 | A | 14803.5470 | -4.6 |
| <b>271</b> | 6 | 3 | 4 | 5 | 3 | 3 | E | 14811.9973 | 2.7  |
| <b>272</b> | 7 | 3 | 5 | 6 | 3 | 4 | A | 17273.7335 | -4.0 |
| <b>273</b> | 8 | 3 | 6 | 7 | 3 | 5 | A | 19720.3064 | -4.5 |
| <b>274</b> | 8 | 3 | 6 | 7 | 3 | 5 | E | 19720.8662 | 4.7  |
| <b>275</b> | 9 | 3 | 7 | 8 | 3 | 6 | A | 22132.0674 | -5.2 |
| <b>276</b> | 9 | 3 | 7 | 8 | 3 | 6 | E | 22131.8834 | 5.8  |
| <b>277</b> | 5 | 3 | 2 | 4 | 3 | 2 | E | 12470.0674 | 1.6  |

|            |   |   |   |   |   |   |   |            |      |
|------------|---|---|---|---|---|---|---|------------|------|
| <b>278</b> | 5 | 3 | 3 | 4 | 3 | 1 | E | 12250.4415 | 2.2  |
| <b>279</b> | 4 | 4 | 1 | 4 | 3 | 2 | A | 16506.9480 | -0.2 |
| <b>280</b> | 4 | 4 | 1 | 4 | 3 | 2 | E | 16479.4681 | 0.2  |
| <b>281</b> | 5 | 4 | 2 | 5 | 3 | 3 | A | 16483.7622 | 1.0  |
| <b>282</b> | 5 | 4 | 2 | 5 | 3 | 3 | E | 16441.4346 | 0.9  |
| <b>283</b> | 6 | 4 | 3 | 6 | 3 | 4 | A | 16471.8023 | 0.9  |
| <b>284</b> | 6 | 4 | 3 | 6 | 3 | 4 | E | 16424.8979 | -2.2 |
| <b>285</b> | 7 | 4 | 4 | 7 | 3 | 5 | A | 16496.7850 | 0.1  |
| <b>286</b> | 7 | 4 | 4 | 7 | 3 | 5 | E | 16458.1726 | -4.7 |
| <b>287</b> | 4 | 4 | 0 | 4 | 3 | 1 | A | 16480.6679 | -0.3 |
| <b>288</b> | 4 | 4 | 0 | 4 | 3 | 1 | E | 16503.2533 | -2.2 |
| <b>289</b> | 5 | 4 | 1 | 5 | 3 | 3 | E | 16551.8925 | 2.2  |
| <b>290</b> | 5 | 4 | 1 | 5 | 3 | 2 | A | 16381.7247 | 0.6  |
| <b>291</b> | 5 | 4 | 1 | 5 | 3 | 2 | E | 16419.1814 | -2.5 |
| <b>292</b> | 6 | 4 | 2 | 6 | 3 | 3 | A | 16179.7629 | -0.1 |
| <b>293</b> | 6 | 4 | 2 | 6 | 3 | 3 | E | 16221.8377 | -1.9 |
| <b>294</b> | 7 | 4 | 3 | 7 | 3 | 4 | A | 15817.3904 | -1.1 |
| <b>295</b> | 7 | 4 | 3 | 7 | 3 | 4 | E | 15851.2393 | -0.2 |
| <b>296</b> | 5 | 4 | 2 | 5 | 3 | 2 | E | 16308.7244 | -2.9 |
| <b>297</b> | 5 | 4 | 1 | 4 | 4 | 0 | A | 12300.5652 | -4.3 |
| <b>298</b> | 5 | 4 | 1 | 4 | 4 | 0 | E | 12299.0768 | 2.8  |
| <b>299</b> | 6 | 4 | 2 | 5 | 4 | 1 | A | 14800.3429 | -5.1 |
| <b>300</b> | 6 | 4 | 2 | 5 | 4 | 1 | E | 14795.5410 | 2.5  |
| <b>301</b> | 8 | 4 | 4 | 7 | 4 | 3 | A | 19893.4549 | -5.5 |
| <b>302</b> | 8 | 4 | 4 | 7 | 4 | 3 | E | 19875.8324 | 3.8  |
| <b>303</b> | 5 | 4 | 2 | 4 | 4 | 1 | A | 12298.5969 | -3.4 |
| <b>304</b> | 5 | 4 | 2 | 4 | 4 | 1 | E | 12299.3260 | 0.8  |
| <b>305</b> | 6 | 4 | 3 | 5 | 4 | 2 | A | 14791.5874 | -4.5 |
| <b>306</b> | 6 | 4 | 3 | 5 | 4 | 2 | E | 14795.4621 | 1.1  |
| <b>307</b> | 8 | 4 | 5 | 7 | 4 | 4 | A | 19817.2491 | -5.4 |
| <b>308</b> | 8 | 4 | 5 | 7 | 4 | 4 | E | 19833.5806 | 2.9  |
| <b>309</b> | 5 | 5 | 0 | 5 | 4 | 1 | A | 21220.7752 | 3.5  |
| <b>310</b> | 5 | 5 | 0 | 5 | 4 | 1 | E | 21232.5895 | -2.5 |
| <b>311</b> | 5 | 5 | 1 | 5 | 4 | 2 | A | 21222.9759 | 1.7  |
| <b>312</b> | 5 | 5 | 1 | 5 | 4 | 2 | E | 21204.8729 | 5.0  |



**Table S6:** Observed frequencies  $\nu_{obs}$  of 245 rotational transitions of *anti*-2AT with  $\nu_{obs}-\nu_{calc}$  values obtained from a fit with the program XIAM.

| No. | <i>J</i>    | <i>K<sub>a</sub></i> | <i>K<sub>c</sub></i> | <i>J</i>    | <i>K<sub>a</sub></i> | <i>K<sub>c</sub></i> | Species | $\nu_{obs}$ | $\nu_{obs}-\nu_{calc}$ |
|-----|-------------|----------------------|----------------------|-------------|----------------------|----------------------|---------|-------------|------------------------|
|     | upper level |                      |                      | lower level |                      |                      |         | MHz         | kHz                    |
| 1   | 2           | 0                    | 2                    | 1           | 0                    | 1                    | A       | 4830.2630   | 0.0                    |
| 2   | 2           | 0                    | 2                    | 1           | 0                    | 1                    | E       | 4829.9144   | -2.1                   |
| 3   | 3           | 0                    | 3                    | 2           | 0                    | 2                    | A       | 7124.0106   | -0.4                   |
| 4   | 3           | 0                    | 3                    | 2           | 0                    | 2                    | E       | 7123.6305   | -1.6                   |
| 5   | 4           | 0                    | 4                    | 3           | 0                    | 3                    | A       | 9298.1055   | 0.5                    |
| 6   | 4           | 0                    | 4                    | 3           | 0                    | 3                    | E       | 9297.7760   | -0.7                   |
| 7   | 5           | 0                    | 5                    | 4           | 0                    | 4                    | A       | 11369.2812  | -0.5                   |
| 8   | 5           | 0                    | 5                    | 4           | 0                    | 4                    | E       | 11369.0267  | 0.5                    |
| 9   | 6           | 0                    | 6                    | 5           | 0                    | 5                    | A       | 13384.6171  | 0.1                    |
| 10  | 6           | 0                    | 6                    | 5           | 0                    | 5                    | E       | 13384.4106  | 0.3                    |
| 11  | 7           | 0                    | 7                    | 6           | 0                    | 6                    | A       | 15386.8784  | 0.3                    |
| 12  | 7           | 0                    | 7                    | 6           | 0                    | 6                    | E       | 15386.6903  | -0.1                   |
| 13  | 9           | 0                    | 9                    | 8           | 0                    | 8                    | A       | 19416.8373  | -0.9                   |
| 14  | 9           | 0                    | 9                    | 8           | 0                    | 8                    | E       | 19416.6521  | 0.0                    |
| 15  | 10          | 0                    | 10                   | 9           | 0                    | 9                    | A       | 21446.0507  | -1.6                   |
| 16  | 10          | 0                    | 10                   | 9           | 0                    | 9                    | E       | 21445.8649  | -0.5                   |
| 17  | 2           | 1                    | 2                    | 1           | 1                    | 1                    | A       | 4482.8079   | -0.1                   |
| 18  | 2           | 1                    | 2                    | 1           | 1                    | 1                    | E       | 4483.0426   | 1.9                    |
| 19  | 3           | 1                    | 3                    | 2           | 1                    | 2                    | A       | 6694.3484   | 0.9                    |
| 20  | 3           | 1                    | 3                    | 2           | 1                    | 2                    | E       | 6694.2221   | 0.0                    |
| 21  | 4           | 1                    | 4                    | 3           | 1                    | 3                    | A       | 8875.3980   | 0.1                    |
| 22  | 4           | 1                    | 4                    | 3           | 1                    | 3                    | E       | 8875.1785   | -0.2                   |
| 23  | 5           | 1                    | 5                    | 4           | 1                    | 4                    | A       | 11023.6480  | 0.0                    |
| 24  | 5           | 1                    | 5                    | 4           | 1                    | 4                    | E       | 11023.3967  | -0.1                   |
| 25  | 6           | 1                    | 6                    | 5           | 1                    | 5                    | A       | 13141.2561  | -0.3                   |
| 26  | 6           | 1                    | 6                    | 5           | 1                    | 5                    | E       | 13141.0005  | 0.3                    |
| 27  | 7           | 1                    | 7                    | 6           | 1                    | 6                    | A       | 15233.4817  | 0.1                    |
| 28  | 7           | 1                    | 7                    | 6           | 1                    | 6                    | E       | 15233.2327  | -0.5                   |
| 29  | 8           | 1                    | 8                    | 7           | 1                    | 7                    | A       | 17306.7845  | -0.6                   |
| 30  | 8           | 1                    | 8                    | 7           | 1                    | 7                    | E       | 17306.5497  | 0.1                    |
| 31  | 9           | 1                    | 9                    | 8           | 1                    | 8                    | A       | 19367.2215  | 2.2                    |
| 32  | 9           | 1                    | 9                    | 8           | 1                    | 8                    | E       | 19366.9922  | -4.8                   |
| 33  | 10          | 1                    | 10                   | 9           | 1                    | 9                    | A       | 21419.5552  | -1.4                   |
| 34  | 10          | 1                    | 10                   | 9           | 1                    | 9                    | E       | 21419.3452  | -1.1                   |
| 35  | 3           | 0                    | 3                    | 2           | 1                    | 2                    | A       | 5335.9211   | 1.9                    |
| 36  | 3           | 0                    | 3                    | 2           | 1                    | 2                    | E       | 5335.6510   | -3.6                   |
| 37  | 4           | 0                    | 4                    | 3           | 1                    | 3                    | A       | 7939.6766   | -0.1                   |
| 38  | 4           | 0                    | 4                    | 3           | 1                    | 3                    | E       | 7939.2060   | -3.1                   |
| 39  | 5           | 0                    | 5                    | 4           | 1                    | 4                    | A       | 10433.5601  | -0.4                   |
| 40  | 5           | 0                    | 5                    | 4           | 1                    | 4                    | E       | 10433.0542  | -2.4                   |
| 41  | 6           | 0                    | 6                    | 5           | 1                    | 5                    | A       | 12794.5289  | -0.7                   |
| 42  | 6           | 0                    | 6                    | 5           | 1                    | 5                    | E       | 12794.0684  | -1.8                   |

|    |    |   |    |   |   |   |   |            |      |
|----|----|---|----|---|---|---|---|------------|------|
| 43 | 7  | 0 | 7  | 6 | 1 | 6 | A | 15040.1516 | 0.2  |
| 44 | 7  | 0 | 7  | 6 | 1 | 6 | E | 15039.7597 | -0.7 |
| 45 | 8  | 0 | 8  | 7 | 1 | 7 | A | 17203.0132 | -0.5 |
| 46 | 8  | 0 | 8  | 7 | 1 | 7 | E | 17202.6861 | -0.3 |
| 47 | 9  | 0 | 9  | 8 | 1 | 8 | A | 19313.0659 | -0.9 |
| 48 | 9  | 0 | 9  | 8 | 1 | 8 | E | 19312.7888 | 0.0  |
| 49 | 10 | 0 | 10 | 9 | 1 | 9 | A | 21391.8988 | -1.1 |
| 50 | 10 | 0 | 10 | 9 | 1 | 9 | E | 21391.6563 | -0.9 |
| 51 | 1  | 1 | 1  | 0 | 0 | 0 | E | 4575.0944  | -0.8 |
| 52 | 2  | 1 | 2  | 1 | 0 | 1 | A | 6618.3507  | -4.1 |
| 53 | 2  | 1 | 2  | 1 | 0 | 1 | E | 6617.8939  | -0.1 |
| 54 | 3  | 1 | 3  | 2 | 0 | 2 | A | 8482.4445  | 5.2  |
| 55 | 3  | 1 | 3  | 2 | 0 | 2 | E | 8482.2014  | 1.8  |
| 56 | 4  | 1 | 4  | 3 | 0 | 3 | A | 10233.8307 | 4.5  |
| 57 | 4  | 1 | 4  | 3 | 0 | 3 | E | 10233.7492 | 2.9  |
| 58 | 5  | 1 | 5  | 4 | 0 | 4 | A | 11959.3689 | -0.3 |
| 59 | 6  | 1 | 6  | 5 | 0 | 5 | A | 13731.3431 | -0.7 |
| 60 | 7  | 1 | 7  | 6 | 0 | 6 | A | 15580.2075 | -0.8 |
| 61 | 7  | 1 | 7  | 6 | 0 | 6 | E | 15580.1649 | 1.6  |
| 62 | 8  | 1 | 8  | 7 | 0 | 7 | A | 17500.1145 | -0.8 |
| 63 | 8  | 1 | 8  | 7 | 0 | 7 | E | 17500.0232 | 0.8  |
| 64 | 9  | 1 | 9  | 8 | 0 | 8 | A | 19470.9895 | -1.2 |
| 65 | 9  | 1 | 9  | 8 | 0 | 8 | E | 19470.8606 | 0.4  |
| 66 | 10 | 1 | 10 | 9 | 0 | 9 | A | 21473.7071 | -1.9 |
| 67 | 10 | 1 | 10 | 9 | 0 | 9 | E | 21473.5538 | -0.7 |
| 68 | 2  | 1 | 1  | 1 | 1 | 0 | A | 5278.9916  | 0.4  |
| 69 | 3  | 1 | 2  | 2 | 1 | 1 | A | 7884.5543  | -0.7 |
| 70 | 3  | 1 | 2  | 2 | 1 | 1 | E | 7883.7584  | -0.1 |
| 71 | 4  | 1 | 3  | 3 | 1 | 2 | A | 10443.6288 | -0.8 |
| 72 | 4  | 1 | 3  | 3 | 1 | 2 | E | 10442.6438 | -2.0 |
| 73 | 5  | 1 | 4  | 4 | 1 | 3 | A | 12931.5750 | -0.6 |
| 74 | 5  | 1 | 4  | 4 | 1 | 3 | E | 12930.4432 | -3.3 |
| 75 | 6  | 1 | 5  | 5 | 1 | 4 | A | 15319.1476 | 0.2  |
| 76 | 6  | 1 | 5  | 5 | 1 | 4 | E | 15317.9923 | -2.7 |
| 77 | 7  | 1 | 6  | 6 | 1 | 5 | A | 17580.4946 | 0.4  |
| 78 | 7  | 1 | 6  | 6 | 1 | 5 | E | 17579.4454 | -0.6 |
| 79 | 8  | 1 | 7  | 7 | 1 | 6 | A | 19709.8626 | 1.3  |
| 80 | 8  | 1 | 7  | 7 | 1 | 6 | E | 19708.9856 | 1.7  |
| 81 | 9  | 1 | 8  | 8 | 1 | 7 | A | 21735.0646 | 2.0  |
| 82 | 10 | 1 | 9  | 9 | 1 | 8 | A | 23707.0041 | 3.3  |
| 83 | 10 | 1 | 9  | 9 | 1 | 8 | E | 23706.3611 | 3.9  |
| 84 | 2  | 2 | 1  | 2 | 1 | 2 | A | 7600.9096  | -0.8 |
| 85 | 2  | 2 | 1  | 2 | 1 | 2 | E | 7585.6292  | 4.0  |
| 86 | 3  | 2 | 2  | 3 | 1 | 3 | A | 8227.9095  | 1.7  |
| 87 | 3  | 2 | 2  | 3 | 1 | 3 | E | 8223.1713  | -1.4 |
| 88 | 4  | 2 | 3  | 4 | 1 | 4 | A | 9074.7495  | -5.8 |
| 89 | 4  | 2 | 3  | 4 | 1 | 4 | E | 9072.0881  | -0.6 |

|            |   |   |   |   |   |   |   |            |      |
|------------|---|---|---|---|---|---|---|------------|------|
| <b>90</b>  | 5 | 2 | 4 | 5 | 1 | 5 | A | 10140.9574 | -6.8 |
| <b>91</b>  | 5 | 2 | 4 | 5 | 1 | 5 | E | 10138.5439 | -1.2 |
| <b>92</b>  | 6 | 2 | 5 | 6 | 1 | 6 | A | 11417.0445 | -7.3 |
| <b>93</b>  | 6 | 2 | 5 | 6 | 1 | 6 | E | 11414.3544 | -1.0 |
| <b>94</b>  | 7 | 2 | 6 | 7 | 1 | 7 | A | 12883.3730 | -5.4 |
| <b>95</b>  | 7 | 2 | 6 | 7 | 1 | 7 | E | 12880.1965 | -0.5 |
| <b>96</b>  | 8 | 2 | 7 | 8 | 1 | 8 | A | 14511.7789 | -3.2 |
| <b>97</b>  | 8 | 2 | 7 | 8 | 1 | 8 | E | 14508.0242 | 0.2  |
| <b>98</b>  | 9 | 2 | 8 | 9 | 1 | 9 | A | 16269.3996 | 0.1  |
| <b>99</b>  | 9 | 2 | 8 | 9 | 1 | 9 | E | 16265.0335 | 3.1  |
| <b>100</b> | 3 | 3 | 1 | 3 | 2 | 2 | A | 11702.8016 | 1.6  |
| <b>101</b> | 3 | 3 | 1 | 3 | 2 | 2 | E | 11661.0107 | -2.2 |
| <b>102</b> | 4 | 3 | 2 | 4 | 2 | 3 | A | 11832.5516 | 2.4  |
| <b>103</b> | 4 | 3 | 2 | 4 | 2 | 3 | E | 11798.4272 | 0.4  |
| <b>104</b> | 5 | 3 | 3 | 5 | 2 | 4 | A | 12080.4586 | 2.0  |
| <b>105</b> | 5 | 3 | 3 | 5 | 2 | 4 | E | 12063.1522 | 1.7  |
| <b>106</b> | 6 | 3 | 4 | 6 | 2 | 5 | A | 12485.4247 | 2.7  |
| <b>107</b> | 6 | 3 | 4 | 6 | 2 | 5 | E | 12477.8655 | -1.1 |
| <b>108</b> | 7 | 3 | 5 | 7 | 2 | 6 | A | 13079.7061 | 0.0  |
| <b>109</b> | 7 | 3 | 5 | 7 | 2 | 6 | E | 13075.3548 | -0.4 |
| <b>110</b> | 8 | 3 | 6 | 8 | 2 | 7 | A | 13885.1520 | -0.9 |
| <b>111</b> | 8 | 3 | 6 | 8 | 2 | 7 | E | 13881.6506 | -0.7 |
| <b>112</b> | 3 | 2 | 2 | 2 | 2 | 1 | A | 7321.3452  | 0.3  |
| <b>113</b> | 3 | 2 | 2 | 2 | 2 | 1 | E | 7331.7730  | 3.4  |
| <b>114</b> | 4 | 2 | 3 | 3 | 2 | 2 | A | 9722.2452  | -0.2 |
| <b>115</b> | 4 | 2 | 3 | 3 | 2 | 2 | E | 9724.0955  | 0.8  |
| <b>116</b> | 5 | 2 | 4 | 4 | 2 | 3 | A | 12089.8546 | -2.3 |
| <b>117</b> | 6 | 2 | 5 | 5 | 2 | 4 | A | 14417.3434 | -0.5 |
| <b>118</b> | 6 | 2 | 5 | 5 | 2 | 4 | E | 14416.8106 | 0.1  |
| <b>119</b> | 7 | 2 | 6 | 6 | 2 | 5 | A | 16699.8087 | 0.5  |
| <b>120</b> | 7 | 2 | 6 | 6 | 2 | 5 | E | 16699.0752 | 0.4  |
| <b>121</b> | 8 | 2 | 7 | 7 | 2 | 6 | A | 18935.1902 | 1.3  |
| <b>122</b> | 8 | 2 | 7 | 7 | 2 | 6 | E | 18934.3782 | 1.6  |
| <b>123</b> | 9 | 2 | 8 | 8 | 2 | 7 | A | 21124.8382 | 1.6  |
| <b>124</b> | 9 | 2 | 8 | 8 | 2 | 7 | E | 21124.0051 | 1.7  |
| <b>125</b> | 4 | 3 | 2 | 3 | 3 | 1 | A | 9851.9928  | -1.9 |
| <b>126</b> | 4 | 3 | 2 | 3 | 3 | 1 | E | 9861.5092  | 0.6  |
| <b>127</b> | 5 | 3 | 3 | 4 | 3 | 2 | A | 12337.7636 | -0.7 |
| <b>128</b> | 5 | 3 | 3 | 4 | 3 | 2 | E | 12354.5779 | 1.0  |
| <b>129</b> | 6 | 3 | 4 | 5 | 3 | 3 | A | 14822.3089 | -0.3 |
| <b>130</b> | 6 | 3 | 4 | 5 | 3 | 3 | E | 14831.5264 | -0.2 |
| <b>131</b> | 7 | 3 | 5 | 6 | 3 | 4 | A | 17294.0915 | -0.7 |
| <b>132</b> | 7 | 3 | 5 | 6 | 3 | 4 | E | 17296.5640 | 0.6  |
| <b>133</b> | 8 | 3 | 6 | 7 | 3 | 5 | A | 19740.6365 | 0.8  |
| <b>134</b> | 8 | 3 | 6 | 7 | 3 | 5 | E | 19740.6735 | 0.8  |
| <b>135</b> | 9 | 3 | 7 | 8 | 3 | 6 | A | 22150.4908 | 0.8  |
| <b>136</b> | 9 | 3 | 7 | 8 | 3 | 6 | E | 22149.6328 | 2.7  |

|            |   |   |   |   |   |   |   |            |      |
|------------|---|---|---|---|---|---|---|------------|------|
| <b>137</b> | 2 | 2 | 1 | 2 | 0 | 2 | A | 9389.0045  | 2.3  |
| <b>138</b> | 2 | 2 | 1 | 2 | 0 | 2 | E | 9373.6019  | -0.8 |
| <b>139</b> | 3 | 2 | 2 | 3 | 0 | 3 | A | 9586.3357  | -0.4 |
| <b>140</b> | 3 | 2 | 2 | 3 | 0 | 3 | E | 9581.7410  | 0.8  |
| <b>141</b> | 4 | 2 | 3 | 4 | 0 | 4 | A | 10010.4761 | -0.4 |
| <b>142</b> | 4 | 2 | 3 | 4 | 0 | 4 | E | 10008.0610 | 2.7  |
| <b>143</b> | 5 | 2 | 4 | 5 | 0 | 5 | A | 10731.0493 | -2.4 |
| <b>144</b> | 5 | 2 | 4 | 5 | 0 | 5 | E | 10728.8862 | 1.0  |
| <b>145</b> | 6 | 2 | 5 | 6 | 0 | 6 | A | 11763.7734 | -5.2 |
| <b>146</b> | 6 | 2 | 5 | 6 | 0 | 6 | E | 11761.2862 | 0.8  |
| <b>147</b> | 7 | 2 | 6 | 7 | 0 | 7 | A | 13076.7083 | -0.3 |
| <b>148</b> | 7 | 2 | 6 | 7 | 0 | 7 | E | 13073.6700 | 0.1  |
| <b>149</b> | 3 | 2 | 1 | 2 | 2 | 0 | A | 7518.6799  | -0.2 |
| <b>150</b> | 3 | 2 | 1 | 2 | 2 | 0 | E | 7507.2125  | 0.9  |
| <b>151</b> | 4 | 2 | 2 | 3 | 2 | 1 | A | 10185.6577 | -1.0 |
| <b>152</b> | 4 | 2 | 2 | 3 | 2 | 1 | E | 10182.3581 | 2.1  |
| <b>153</b> | 5 | 2 | 3 | 4 | 2 | 2 | A | 12920.6521 | -1.2 |
| <b>154</b> | 5 | 2 | 3 | 4 | 2 | 2 | E | 12918.7918 | 2.3  |
| <b>155</b> | 6 | 2 | 4 | 5 | 2 | 3 | A | 15665.8383 | -1.4 |
| <b>156</b> | 6 | 2 | 4 | 5 | 2 | 3 | E | 15664.1181 | 1.2  |
| <b>157</b> | 7 | 2 | 5 | 6 | 2 | 4 | A | 18364.8570 | -0.4 |
| <b>158</b> | 7 | 2 | 5 | 6 | 2 | 4 | E | 18363.0027 | -0.7 |
| <b>159</b> | 8 | 2 | 6 | 7 | 2 | 5 | A | 20979.4631 | 0.6  |
| <b>160</b> | 8 | 2 | 6 | 7 | 2 | 5 | E | 20977.4620 | -2.6 |
| <b>161</b> | 9 | 2 | 7 | 8 | 2 | 6 | A | 23482.8412 | 1.9  |
| <b>162</b> | 3 | 3 | 0 | 3 | 2 | 1 | A | 11458.8953 | 2.4  |
| <b>163</b> | 3 | 3 | 0 | 3 | 2 | 1 | E | 11498.5059 | 0.1  |
| <b>164</b> | 4 | 3 | 1 | 4 | 2 | 2 | A | 11149.3572 | 0.6  |
| <b>165</b> | 4 | 3 | 1 | 4 | 2 | 2 | E | 11181.3690 | -6.6 |
| <b>166</b> | 5 | 3 | 2 | 5 | 2 | 3 | A | 10648.9668 | 0.1  |
| <b>167</b> | 5 | 3 | 2 | 5 | 2 | 3 | E | 10664.2365 | -5.4 |
| <b>168</b> | 6 | 3 | 3 | 6 | 2 | 4 | A | 10015.9054 | -0.4 |
| <b>169</b> | 6 | 3 | 3 | 6 | 2 | 4 | E | 10021.4307 | -6.5 |
| <b>170</b> | 2 | 2 | 1 | 1 | 1 | 0 | A | 11685.6228 | -3.7 |
| <b>171</b> | 2 | 2 | 1 | 1 | 1 | 0 | E | 11669.4869 | 2.4  |
| <b>172</b> | 3 | 2 | 2 | 2 | 1 | 1 | A | 13727.9771 | -3.1 |
| <b>173</b> | 3 | 2 | 2 | 2 | 1 | 1 | E | 13723.0930 | -4.6 |
| <b>174</b> | 4 | 2 | 3 | 3 | 1 | 2 | A | 15565.6670 | -3.6 |
| <b>175</b> | 4 | 2 | 3 | 3 | 1 | 2 | E | 15563.4302 | -3.7 |
| <b>176</b> | 5 | 2 | 4 | 4 | 1 | 3 | A | 17211.8939 | -4.0 |
| <b>177</b> | 5 | 2 | 4 | 4 | 1 | 3 | E | 17210.6398 | -1.4 |
| <b>178</b> | 6 | 2 | 5 | 5 | 1 | 4 | A | 18697.6624 | -3.9 |
| <b>179</b> | 6 | 2 | 5 | 5 | 1 | 4 | E | 18697.0075 | 2.3  |
| <b>180</b> | 8 | 2 | 7 | 7 | 1 | 6 | A | 21433.0215 | -0.1 |
| <b>181</b> | 2 | 2 | 0 | 1 | 1 | 1 | A | 12134.3571 | 1.7  |
| <b>182</b> | 2 | 2 | 0 | 1 | 1 | 1 | E | 12148.4728 | 5.4  |
| <b>183</b> | 3 | 2 | 1 | 2 | 1 | 2 | A | 15170.2303 | 2.9  |

|     |    |   |   |    |   |   |   |            |      |
|-----|----|---|---|----|---|---|---|------------|------|
| 184 | 3  | 2 | 1 | 2  | 1 | 2 | E | 15172.6379 | -0.4 |
| 185 | 4  | 2 | 2 | 3  | 1 | 3 | A | 18661.5429 | 4.2  |
| 186 | 4  | 2 | 2 | 3  | 1 | 3 | E | 18660.7733 | 1.1  |
| 187 | 5  | 2 | 3 | 4  | 1 | 4 | A | 22706.8006 | 6.5  |
| 188 | 5  | 2 | 3 | 4  | 1 | 4 | E | 22704.3858 | 2.9  |
| 189 | 4  | 3 | 1 | 3  | 3 | 0 | A | 9876.1213  | -1.2 |
| 190 | 4  | 3 | 1 | 3  | 3 | 0 | E | 9865.2238  | -2.0 |
| 191 | 5  | 3 | 2 | 4  | 3 | 1 | A | 12420.2622 | -1.2 |
| 192 | 5  | 3 | 2 | 4  | 3 | 1 | E | 12401.6576 | 1.8  |
| 193 | 6  | 3 | 3 | 5  | 3 | 2 | A | 15032.7775 | -1.3 |
| 194 | 6  | 3 | 3 | 5  | 3 | 2 | E | 15021.3132 | 1.1  |
| 195 | 7  | 3 | 4 | 6  | 3 | 3 | A | 17732.7939 | -1.3 |
| 196 | 7  | 3 | 4 | 6  | 3 | 3 | E | 17727.5857 | 2.6  |
| 197 | 8  | 3 | 5 | 7  | 3 | 4 | A | 20518.7472 | -1.2 |
| 198 | 8  | 3 | 5 | 7  | 3 | 4 | E | 20515.4742 | 3.3  |
| 199 | 4  | 1 | 3 | 3  | 2 | 2 | E | 4603.3084  | 1.7  |
| 200 | 5  | 1 | 4 | 4  | 2 | 3 | E | 7809.6565  | -2.0 |
| 201 | 6  | 1 | 5 | 5  | 2 | 4 | A | 11038.8234 | -1.6 |
| 202 | 6  | 1 | 5 | 5  | 2 | 4 | E | 11037.7961 | -4.2 |
| 203 | 7  | 1 | 6 | 6  | 2 | 5 | A | 14201.9737 | -1.7 |
| 204 | 7  | 1 | 6 | 6  | 2 | 5 | E | 14200.4305 | -5.2 |
| 205 | 9  | 1 | 8 | 8  | 2 | 7 | A | 20011.9038 | 1.6  |
| 206 | 9  | 1 | 8 | 8  | 2 | 7 | E | 20010.3028 | -2.0 |
| 207 | 2  | 2 | 0 | 2  | 1 | 1 | A | 6457.2687  | -3.5 |
| 208 | 2  | 2 | 0 | 2  | 1 | 1 | E | 6471.1314  | 1.9  |
| 209 | 3  | 2 | 1 | 3  | 1 | 2 | A | 6091.3941  | -3.3 |
| 210 | 3  | 2 | 1 | 3  | 1 | 2 | E | 6094.5796  | -3.0 |
| 211 | 4  | 2 | 2 | 4  | 1 | 3 | A | 5833.4261  | -0.5 |
| 212 | 4  | 2 | 2 | 4  | 1 | 3 | E | 5834.2930  | 0.2  |
| 213 | 7  | 2 | 5 | 7  | 1 | 6 | A | 6953.5611  | 1.4  |
| 214 | 7  | 2 | 5 | 7  | 1 | 6 | E | 6952.3249  | 9.8  |
| 215 | 8  | 2 | 6 | 8  | 1 | 7 | E | 8220.8010  | 5.2  |
| 216 | 9  | 2 | 7 | 9  | 1 | 8 | E | 9967.2635  | -1.3 |
| 217 | 10 | 2 | 8 | 10 | 1 | 9 | E | 12110.9938 | -4.4 |
| 218 | 3  | 2 | 1 | 2  | 0 | 2 | A | 16958.3182 | -1.1 |
| 219 | 3  | 2 | 1 | 2  | 0 | 2 | E | 16960.6174 | 1.6  |
| 220 | 4  | 2 | 2 | 3  | 0 | 3 | A | 20019.9689 | 1.9  |
| 221 | 4  | 2 | 2 | 3  | 0 | 3 | E | 20019.3440 | 4.3  |
| 222 | 3  | 3 | 0 | 2  | 2 | 1 | A | 19028.2122 | 2.3  |
| 223 | 4  | 3 | 1 | 3  | 2 | 2 | A | 21582.9893 | 1.8  |
| 224 | 4  | 3 | 1 | 3  | 2 | 2 | E | 21618.9801 | 5.0  |
| 225 | 5  | 3 | 2 | 4  | 2 | 3 | A | 24281.0066 | 1.1  |
| 226 | 5  | 3 | 2 | 4  | 2 | 3 | E | 24296.5345 | -1.6 |
| 227 | 3  | 3 | 1 | 2  | 2 | 0 | A | 18973.5105 | 2.6  |
| 228 | 4  | 3 | 2 | 3  | 2 | 1 | A | 21306.8246 | 2.1  |
| 229 | 4  | 3 | 2 | 3  | 2 | 1 | E | 21267.2806 | 2.5  |
| 230 | 5  | 3 | 3 | 4  | 2 | 2 | A | 23458.9305 | 2.5  |

|            |   |   |   |   |   |   |   |            |      |
|------------|---|---|---|---|---|---|---|------------|------|
| <b>231</b> | 5 | 3 | 3 | 4 | 2 | 2 | E | 23439.4953 | -3.7 |
| <b>232</b> | 2 | 2 | 0 | 2 | 1 | 2 | E | 7665.4300  | 3.3  |
| <b>233</b> | 3 | 2 | 1 | 3 | 1 | 3 | E | 8478.4169  | 0.7  |
| <b>234</b> | 2 | 2 | 1 | 2 | 1 | 1 | E | 6391.3275  | -0.5 |
| <b>235</b> | 2 | 2 | 1 | 1 | 1 | 1 | E | 12068.6685 | 2.6  |
| <b>236</b> | 2 | 2 | 0 | 1 | 1 | 0 | E | 11749.2887 | 2.7  |
| <b>237</b> | 3 | 2 | 1 | 2 | 2 | 1 | E | 7587.0125  | -0.6 |
| <b>238</b> | 3 | 2 | 2 | 2 | 1 | 2 | E | 14917.3920 | -2.9 |
| <b>239</b> | 3 | 2 | 1 | 2 | 1 | 1 | E | 13978.3384 | -2.7 |
| <b>240</b> | 3 | 3 | 1 | 2 | 2 | 1 | E | 18992.7838 | 1.2  |
| <b>241</b> | 3 | 3 | 0 | 2 | 2 | 0 | E | 19005.7156 | -1.8 |
| <b>242</b> | 3 | 3 | 0 | 3 | 2 | 2 | E | 11753.7491 | -0.2 |
| <b>243</b> | 4 | 3 | 1 | 3 | 2 | 1 | E | 21363.7337 | 2.1  |
| <b>244</b> | 4 | 3 | 1 | 4 | 2 | 3 | E | 11894.8786 | -1.7 |
| <b>245</b> | 4 | 3 | 2 | 4 | 2 | 2 | E | 11084.9184 | -3.7 |

**Table S7a:** Observed frequencies  $\nu_{obs}$  of 101 rotational transitions of the  $^{34}\text{S}(1)$  isotopologue (for atom numbering see Figure 1) of *syn*-2AT with  $\nu_{obs}-\nu_{calc}$  values obtained from a fit with the program *XIAM*.

| No.       | <i>J</i>    | <i>K<sub>a</sub></i> | <i>K<sub>c</sub></i> | <i>J</i>    | <i>K<sub>a</sub></i> | <i>K<sub>c</sub></i> | Species | $\nu_{obs}$ | $\nu_{obs}-\nu_{calc}$ |
|-----------|-------------|----------------------|----------------------|-------------|----------------------|----------------------|---------|-------------|------------------------|
|           | upper level |                      |                      | lower level |                      |                      |         | MHz         | kHz                    |
| <b>1</b>  | 4           | 0                    | 4                    | 3           | 0                    | 3                    | E       | 9228.8710   | 1.3                    |
| <b>2</b>  | 4           | 0                    | 4                    | 3           | 0                    | 3                    | A       | 9229.0614   | -3.9                   |
| <b>3</b>  | 5           | 0                    | 5                    | 4           | 0                    | 4                    | E       | 11284.2547  | 4.2                    |
| <b>4</b>  | 5           | 0                    | 5                    | 4           | 0                    | 4                    | A       | 11284.4362  | -3.8                   |
| <b>5</b>  | 6           | 0                    | 6                    | 5           | 0                    | 5                    | E       | 13284.3109  | 4.1                    |
| <b>6</b>  | 6           | 0                    | 6                    | 5           | 0                    | 5                    | A       | 13284.4834  | -3.7                   |
| <b>7</b>  | 7           | 0                    | 7                    | 6           | 0                    | 6                    | A       | 15271.6819  | -5.4                   |
| <b>8</b>  | 7           | 0                    | 7                    | 6           | 0                    | 6                    | E       | 15271.5219  | 7.7                    |
| <b>9</b>  | 4           | 0                    | 4                    | 3           | 1                    | 3                    | A       | 7882.7979   | -2.6                   |
| <b>10</b> | 4           | 0                    | 4                    | 3           | 1                    | 3                    | E       | 7882.8267   | -0.7                   |
| <b>11</b> | 5           | 0                    | 5                    | 4           | 1                    | 4                    | A       | 10357.6989  | -1.0                   |
| <b>12</b> | 6           | 0                    | 6                    | 5           | 1                    | 5                    | E       | 12700.3885  | 3.9                    |
| <b>13</b> | 6           | 0                    | 6                    | 5           | 1                    | 5                    | A       | 12700.4964  | -3.1                   |
| <b>14</b> | 7           | 0                    | 7                    | 6           | 1                    | 6                    | A       | 14928.8076  | -4.9                   |
| <b>15</b> | 7           | 0                    | 7                    | 6           | 1                    | 6                    | E       | 14928.6752  | 4.0                    |
| <b>16</b> | 8           | 0                    | 8                    | 7           | 1                    | 7                    | A       | 17075.0724  | -3.5                   |
| <b>17</b> | 8           | 0                    | 8                    | 7           | 1                    | 7                    | E       | 17074.9291  | 7.4                    |
| <b>18</b> | 2           | 1                    | 2                    | 1           | 0                    | 1                    | A       | 6567.7968   | -3.4                   |
| <b>19</b> | 2           | 1                    | 2                    | 1           | 0                    | 1                    | E       | 6567.2672   | 1.5                    |
| <b>20</b> | 3           | 1                    | 3                    | 2           | 0                    | 2                    | A       | 8417.7244   | -1.2                   |
| <b>21</b> | 3           | 1                    | 3                    | 2           | 0                    | 2                    | E       | 8417.3197   | 3.7                    |
| <b>22</b> | 4           | 1                    | 4                    | 3           | 0                    | 3                    | A       | 10155.8035  | -2.0                   |

|    |    |   |    |   |   |   |   |            |      |
|----|----|---|----|---|---|---|---|------------|------|
| 23 | 4  | 1 | 4  | 3 | 0 | 3 | E | 10155.4897 | 4.7  |
| 24 | 5  | 1 | 5  | 4 | 0 | 4 | A | 11868.4243 | -3.3 |
| 25 | 5  | 1 | 5  | 4 | 0 | 4 | E | 11868.1803 | 7.6  |
| 26 | 6  | 1 | 6  | 5 | 0 | 5 | A | 13627.3545 | -7.3 |
| 27 | 6  | 1 | 6  | 5 | 0 | 5 | E | 13627.1557 | 6.0  |
| 28 | 7  | 1 | 7  | 6 | 0 | 6 | A | 15462.7158 | -4.7 |
| 29 | 7  | 1 | 7  | 6 | 0 | 6 | E | 15462.5399 | 7.0  |
| 30 | 8  | 1 | 8  | 7 | 0 | 7 | A | 17368.5627 | -6.0 |
| 31 | 8  | 1 | 8  | 7 | 0 | 7 | E | 17368.4004 | 6.7  |
| 32 | 9  | 1 | 9  | 8 | 0 | 8 | A | 19324.9139 | -7.3 |
| 33 | 9  | 1 | 9  | 8 | 0 | 8 | E | 19324.7601 | 7.7  |
| 34 | 10 | 1 | 10 | 9 | 0 | 9 | A | 21312.7858 | -6.2 |
| 35 | 3  | 1 | 3  | 2 | 1 | 2 | E | 6644.7447  | 1.0  |
| 36 | 4  | 1 | 4  | 3 | 1 | 3 | A | 8809.5357  | -4.9 |
| 37 | 4  | 1 | 4  | 3 | 1 | 3 | E | 8809.4442  | 1.5  |
| 38 | 5  | 1 | 5  | 4 | 1 | 4 | A | 10941.6855 | -2.0 |
| 39 | 5  | 1 | 5  | 4 | 1 | 4 | E | 10941.5609 | 3.5  |
| 40 | 6  | 1 | 6  | 5 | 1 | 5 | A | 13043.3767 | 2.4  |
| 41 | 6  | 1 | 6  | 5 | 1 | 5 | E | 13043.2243 | -3.2 |
| 42 | 7  | 1 | 7  | 6 | 1 | 6 | A | 15119.8391 | -6.6 |
| 43 | 7  | 1 | 7  | 6 | 1 | 6 | E | 15119.6972 | 7.3  |
| 44 | 8  | 1 | 8  | 7 | 1 | 7 | A | 17177.5300 | -5.4 |
| 45 | 8  | 1 | 8  | 7 | 1 | 7 | E | 17177.3828 | 7.8  |
| 46 | 9  | 1 | 9  | 8 | 1 | 8 | A | 19222.4557 | -6.0 |
| 47 | 9  | 1 | 9  | 8 | 1 | 8 | E | 19222.3094 | 10.3 |
| 48 | 2  | 1 | 1  | 1 | 1 | 0 | A | 5240.8323  | -0.9 |
| 49 | 2  | 1 | 1  | 1 | 1 | 0 | E | 5240.3113  | 1.0  |
| 50 | 3  | 1 | 2  | 2 | 1 | 1 | A | 7827.4660  | -3.9 |
| 51 | 3  | 1 | 2  | 2 | 1 | 1 | E | 7827.0747  | 0.3  |
| 52 | 4  | 1 | 3  | 3 | 1 | 2 | A | 10367.8135 | -3.3 |
| 53 | 4  | 1 | 3  | 3 | 1 | 2 | E | 10367.3583 | -1.8 |
| 54 | 5  | 1 | 4  | 4 | 1 | 3 | A | 12837.3282 | -2.7 |
| 55 | 5  | 1 | 4  | 4 | 1 | 3 | E | 12836.8033 | 0.2  |
| 56 | 6  | 1 | 5  | 5 | 1 | 4 | A | 15206.8897 | -5.0 |
| 57 | 6  | 1 | 5  | 5 | 1 | 4 | E | 15206.3250 | 2.0  |
| 58 | 7  | 1 | 6  | 6 | 1 | 5 | A | 17450.8251 | -3.3 |
| 59 | 7  | 1 | 6  | 6 | 1 | 5 | E | 17450.2526 | 5.5  |
| 60 | 8  | 1 | 7  | 7 | 1 | 6 | A | 19563.5627 | -2.9 |
| 61 | 2  | 2 | 0  | 1 | 1 | 1 | A | 12041.2279 | -0.5 |
| 62 | 2  | 2 | 0  | 1 | 1 | 1 | E | 12052.5912 | 1.6  |
| 63 | 3  | 2 | 1  | 2 | 1 | 2 | A | 15055.8407 | -0.5 |
| 64 | 3  | 2 | 1  | 2 | 1 | 2 | E | 15057.5716 | -1.0 |
| 65 | 4  | 2 | 2  | 3 | 1 | 3 | A | 18523.3457 | 1.0  |
| 66 | 4  | 2 | 2  | 3 | 1 | 3 | E | 18522.7812 | -1.3 |
| 67 | 5  | 2 | 3  | 4 | 1 | 4 | A | 22541.5712 | 10.2 |
| 68 | 5  | 2 | 3  | 4 | 1 | 4 | E | 22540.0486 | -0.5 |
| 69 | 3  | 2 | 2  | 3 | 1 | 3 | A | 8164.2594  | -0.2 |

|            |   |   |   |   |   |   |   |            |      |
|------------|---|---|---|---|---|---|---|------------|------|
| <b>70</b>  | 3 | 2 | 2 | 3 | 1 | 3 | E | 8160.1229  | -2.6 |
| <b>71</b>  | 4 | 2 | 3 | 4 | 1 | 4 | A | 9005.8395  | -3.9 |
| <b>72</b>  | 4 | 2 | 3 | 4 | 1 | 4 | E | 9003.4940  | -2.3 |
| <b>73</b>  | 2 | 2 | 1 | 1 | 1 | 0 | A | 11595.2391 | -0.5 |
| <b>74</b>  | 2 | 2 | 1 | 1 | 1 | 0 | E | 11581.4930 | 1.9  |
| <b>75</b>  | 3 | 2 | 2 | 2 | 1 | 1 | A | 13622.2736 | -0.8 |
| <b>76</b>  | 3 | 2 | 2 | 2 | 1 | 1 | E | 13617.9753 | -1.2 |
| <b>77</b>  | 4 | 2 | 3 | 3 | 1 | 2 | A | 15445.9259 | -3.0 |
| <b>78</b>  | 4 | 2 | 3 | 3 | 1 | 2 | E | 15443.7179 | 2.2  |
| <b>79</b>  | 5 | 2 | 4 | 4 | 1 | 3 | A | 17079.3562 | -2.6 |
| <b>80</b>  | 5 | 2 | 4 | 4 | 1 | 3 | E | 17077.8409 | 5.1  |
| <b>81</b>  | 6 | 2 | 5 | 5 | 1 | 4 | A | 18553.4589 | -5.0 |
| <b>82</b>  | 6 | 2 | 5 | 5 | 1 | 4 | E | 18552.3028 | 6.5  |
| <b>83</b>  | 7 | 2 | 6 | 6 | 1 | 5 | A | 19923.3919 | -5.1 |
| <b>84</b>  | 2 | 2 | 1 | 1 | 1 | 1 | E | 11977.9801 | -1.0 |
| <b>85</b>  | 4 | 2 | 2 | 3 | 2 | 1 | E | 10109.9537 | 0.1  |
| <b>86</b>  | 3 | 2 | 2 | 2 | 2 | 1 | A | 7267.8631  | -4.8 |
| <b>87</b>  | 3 | 2 | 2 | 2 | 2 | 1 | E | 7276.7979  | 2.1  |
| <b>88</b>  | 4 | 2 | 3 | 3 | 2 | 2 | A | 9651.1209  | -3.5 |
| <b>89</b>  | 4 | 2 | 3 | 3 | 2 | 2 | E | 9652.8142  | 0.7  |
| <b>90</b>  | 3 | 3 | 0 | 3 | 2 | 1 | E | 11401.2237 | -0.6 |
| <b>91</b>  | 4 | 3 | 1 | 4 | 2 | 2 | A | 11058.6329 | 3.5  |
| <b>92</b>  | 4 | 3 | 1 | 4 | 2 | 2 | E | 11085.3667 | -3.0 |
| <b>93</b>  | 5 | 3 | 2 | 5 | 2 | 3 | A | 10561.0786 | 3.1  |
| <b>94</b>  | 5 | 3 | 2 | 5 | 2 | 3 | E | 10572.5054 | -0.7 |
| <b>95</b>  | 3 | 3 | 0 | 2 | 2 | 1 | A | 18881.2647 | -1.0 |
| <b>96</b>  | 4 | 3 | 1 | 3 | 2 | 2 | A | 21417.7141 | -0.4 |
| <b>97</b>  | 4 | 3 | 1 | 3 | 2 | 2 | E | 21448.0279 | 1.2  |
| <b>98</b>  | 3 | 3 | 1 | 2 | 2 | 0 | A | 18826.8098 | 0.7  |
| <b>99</b>  | 3 | 3 | 1 | 2 | 2 | 0 | E | 18773.4359 | -3.9 |
| <b>100</b> | 4 | 3 | 2 | 3 | 2 | 1 | A | 21142.7914 | -1.6 |
| <b>101</b> | 4 | 3 | 2 | 3 | 2 | 1 | E | 21108.4245 | 3.8  |



**Table S7b:** Observed frequencies  $\nu_{obs}$  of 15 rotational transitions of the  $^{13}\text{C}(2)$  isotopologue (for atom numbering see Figure 1) of *syn*-2AT with  $\nu_{obs}-\nu_{calc}$  values obtained from a fit with the program *XIAM*.

| No. | $J$         | $K_a$ | $K_c$ | $J$         | $K_a$ | $K_c$ | Species | $\nu_{obs}$ | $\nu_{obs}-\nu_{calc}$ |
|-----|-------------|-------|-------|-------------|-------|-------|---------|-------------|------------------------|
|     | upper level |       |       | lower level |       |       |         | MHz         | kHz                    |
| 1   | 4           | 1     | 4     | 3           | 0     | 3     | A       | 10273.8004  | -1.0                   |
| 2   | 2           | 2     | 1     | 2           | 1     | 2     | A       | 7695.9099   | -2.3                   |
| 3   | 2           | 2     | 1     | 1           | 1     | 0     | A       | 11783.8983  | -2.3                   |
| 4   | 3           | 2     | 2     | 2           | 1     | 1     | A       | 13827.8934  | 2.5                    |
| 5   | 3           | 2     | 1     | 2           | 1     | 2     | A       | 15249.4457  | -1.9                   |
| 6   | 4           | 2     | 2     | 3           | 1     | 3     | A       | 18718.2489  | 1.8                    |
| 7   | 3           | 3     | 0     | 3           | 2     | 1     | A       | 11634.6232  | -4.2                   |
| 8   | 4           | 3     | 1     | 4           | 2     | 2     | A       | 11333.6653  | 3.1                    |
| 9   | 5           | 3     | 2     | 5           | 2     | 3     | A       | 10843.1712  | 0.1                    |
| 10  | 3           | 3     | 1     | 2           | 2     | 0     | A       | 19135.4367  | -0.4                   |
| 11  | 4           | 3     | 2     | 3           | 2     | 1     | A       | 21469.9412  | -0.5                   |
| 12  | 5           | 3     | 3     | 4           | 2     | 2     | A       | 23628.5288  | 0.5                    |
| 13  | 4           | 4     | 1     | 4           | 3     | 2     | A       | 16500.1732  | 1.7                    |
| 14  | 5           | 4     | 2     | 5           | 3     | 3     | A       | 16476.9860  | 0.5                    |
| 15  | 5           | 4     | 1     | 5           | 3     | 2     | A       | 16374.8112  | -0.2                   |

**Table S7c:** Observed frequencies  $\nu_{obs}$  of 52 rotational transitions of the  $^{13}\text{C}(3)$  isotopologue (for atom numbering see Figure 1) of *syn*-2AT with  $\nu_{obs}-\nu_{calc}$  values obtained from a fit with the program *XIAM*.

| No. | $J$         | $K_a$ | $K_c$ | $J$         | $K_a$ | $K_c$ | Species | $\nu_{obs}$ | $\nu_{obs}-\nu_{calc}$ |
|-----|-------------|-------|-------|-------------|-------|-------|---------|-------------|------------------------|
|     | upper level |       |       | lower level |       |       |         | MHz         | kHz                    |
| 1   | 4           | 0     | 4     | 3           | 0     | 3     | A       | 9265.1309   | -1.0                   |
| 2   | 4           | 0     | 4     | 3           | 0     | 3     | E       | 9264.9402   | -2.9                   |
| 3   | 5           | 0     | 5     | 4           | 0     | 4     | A       | 11328.1381  | -2.0                   |
| 4   | 5           | 0     | 5     | 4           | 0     | 4     | E       | 11327.9575  | -0.7                   |
| 5   | 6           | 0     | 6     | 5           | 0     | 5     | A       | 13335.7568  | -2.3                   |
| 6   | 6           | 0     | 6     | 5           | 0     | 5     | E       | 13335.5886  | 2.0                    |
| 7   | 9           | 0     | 9     | 8           | 0     | 8     | A       | 19346.1255  | -3.6                   |
| 8   | 9           | 0     | 9     | 8           | 0     | 8     | E       | 19345.9766  | 7.0                    |
| 9   | 4           | 0     | 4     | 3           | 1     | 3     | A       | 7916.9141   | -2.4                   |
| 10  | 5           | 0     | 5     | 4           | 1     | 4     | A       | 10400.8150  | 1.2                    |
| 11  | 5           | 0     | 5     | 4           | 1     | 4     | E       | 10400.7392  | -0.7                   |
| 12  | 6           | 0     | 6     | 5           | 1     | 5     | A       | 12751.9538  | 4.2                    |
| 13  | 6           | 0     | 6     | 5           | 1     | 5     | E       | 12751.8306  | -0.2                   |
| 14  | 7           | 0     | 7     | 6           | 1     | 6     | A       | 14988.2157  | -2.0                   |
| 15  | 7           | 0     | 7     | 6           | 1     | 6     | E       | 14988.0750  | -1.4                   |

|    |   |   |   |   |   |   |   |            |      |
|----|---|---|---|---|---|---|---|------------|------|
| 16 | 8 | 0 | 8 | 7 | 1 | 7 | A | 17142.2776 | -1.6 |
| 17 | 8 | 0 | 8 | 7 | 1 | 7 | E | 17142.1224 | -5.1 |
| 18 | 4 | 1 | 3 | 3 | 1 | 2 | A | 10409.9206 | 2.0  |
| 19 | 3 | 1 | 3 | 2 | 0 | 2 | A | 8447.6690  | 1.2  |
| 20 | 3 | 1 | 3 | 2 | 0 | 2 | E | 8447.2789  | -8.7 |
| 21 | 4 | 1 | 4 | 3 | 0 | 3 | A | 10192.4576 | -0.6 |
| 22 | 4 | 1 | 4 | 3 | 0 | 3 | E | 10192.1611 | -0.3 |
| 23 | 5 | 1 | 5 | 4 | 0 | 4 | A | 11911.9489 | -0.7 |
| 24 | 5 | 1 | 5 | 4 | 0 | 4 | E | 11911.7167 | 2.7  |
| 25 | 6 | 1 | 6 | 5 | 0 | 5 | A | 13678.1911 | -2.2 |
| 26 | 7 | 1 | 7 | 6 | 0 | 6 | A | 15521.2510 | -1.7 |
| 27 | 7 | 1 | 7 | 6 | 0 | 6 | E | 15521.0864 | 9.1  |
| 28 | 8 | 1 | 8 | 7 | 0 | 7 | A | 17435.0070 | -1.3 |
| 29 | 9 | 1 | 9 | 8 | 0 | 8 | A | 19399.3285 | -4.0 |
| 30 | 4 | 1 | 4 | 3 | 1 | 3 | A | 8844.2458  | 3.0  |
| 31 | 4 | 1 | 4 | 3 | 1 | 3 | E | 8844.1466  | 1.8  |
| 32 | 5 | 1 | 5 | 4 | 1 | 4 | A | 10984.6212 | -2.1 |
| 33 | 5 | 1 | 5 | 4 | 1 | 4 | E | 10984.4955 | -0.2 |
| 34 | 6 | 1 | 6 | 5 | 1 | 5 | A | 13094.3812 | -2.7 |
| 35 | 6 | 1 | 6 | 5 | 1 | 5 | E | 13094.2440 | 3.2  |
| 36 | 7 | 1 | 7 | 6 | 1 | 6 | A | 15178.8150 | -3.4 |
| 37 | 7 | 1 | 7 | 6 | 1 | 6 | E | 15178.6720 | 4.7  |
| 38 | 8 | 1 | 8 | 7 | 1 | 7 | A | 17244.4095 | 1.9  |
| 39 | 8 | 1 | 8 | 7 | 1 | 7 | E | 17244.2566 | 4.2  |
| 40 | 2 | 2 | 1 | 1 | 1 | 0 | A | 11632.3654 | -0.8 |
| 41 | 3 | 2 | 2 | 2 | 1 | 1 | A | 13667.2744 | -0.9 |
| 42 | 4 | 2 | 3 | 3 | 1 | 2 | A | 15497.8261 | 7.6  |
| 43 | 5 | 2 | 4 | 4 | 1 | 3 | A | 17137.2631 | -0.4 |
| 44 | 6 | 2 | 5 | 5 | 1 | 4 | A | 18616.7765 | 2.8  |
| 45 | 7 | 2 | 6 | 6 | 1 | 5 | A | 19991.9519 | -4.0 |
| 46 | 2 | 2 | 0 | 1 | 1 | 1 | A | 12080.6069 | -1.8 |
| 47 | 3 | 2 | 1 | 2 | 1 | 2 | A | 15108.2448 | -1.4 |
| 48 | 4 | 2 | 2 | 3 | 1 | 3 | A | 18591.3580 | 0.5  |
| 49 | 3 | 3 | 0 | 2 | 2 | 1 | A | 18941.7165 | -0.6 |
| 50 | 4 | 3 | 1 | 3 | 2 | 2 | A | 21488.7657 | 0.8  |
| 51 | 3 | 3 | 1 | 2 | 2 | 0 | A | 18886.8738 | 0.2  |
| 52 | 4 | 3 | 2 | 3 | 2 | 1 | A | 21211.8954 | -0.7 |

**Table S7d:** Observed frequencies  $\nu_{obs}$  of 52 rotational transitions of the  $^{13}\text{C}(4)$  isotopologue (for atom numbering see Figure 1) of *syn*-2AT with  $\nu_{obs}-\nu_{calc}$  values obtained from a fit with the program *XIAM*.

| No. | $J$         | $K_a$ | $K_c$ | $J$         | $K_a$ | $K_c$ | Species | $\nu_{obs}$ | $\nu_{obs}-\nu_{calc}$ |
|-----|-------------|-------|-------|-------------|-------|-------|---------|-------------|------------------------|
|     | upper level |       |       | lower level |       |       |         | MHz         | kHz                    |
| 1   | 4           | 0     | 4     | 3           | 0     | 3     | A       | 9205.8244   | -1.9                   |
| 2   | 4           | 0     | 4     | 3           | 0     | 3     | E       | 9205.6329   | 0.8                    |
| 3   | 5           | 0     | 5     | 4           | 0     | 4     | A       | 11260.9987  | -2.4                   |
| 4   | 5           | 0     | 5     | 4           | 0     | 4     | E       | 11260.8177  | 3.1                    |
| 5   | 6           | 0     | 6     | 5           | 0     | 5     | A       | 13259.2442  | -2.5                   |
| 6   | 6           | 0     | 6     | 5           | 0     | 5     | E       | 13259.0757  | 5.3                    |
| 7   | 3           | 0     | 3     | 2           | 1     | 2     | A       | 5242.8148   | -3.6                   |
| 8   | 3           | 0     | 3     | 2           | 1     | 2     | E       | 5242.9937   | 3.3                    |
| 9   | 5           | 0     | 5     | 4           | 1     | 4     | A       | 10300.5210  | -2.4                   |
| 10  | 5           | 0     | 5     | 4           | 1     | 4     | E       | 10300.4490  | 4.4                    |
| 11  | 6           | 0     | 6     | 5           | 1     | 5     | A       | 12647.2114  | -2.5                   |
| 12  | 6           | 0     | 6     | 5           | 1     | 5     | E       | 12647.0915  | 2.3                    |
| 13  | 7           | 0     | 7     | 6           | 1     | 6     | A       | 14879.0763  | -2.4                   |
| 14  | 4           | 1     | 3     | 3           | 1     | 2     | A       | 10322.1764  | 0.2                    |
| 15  | 4           | 1     | 3     | 3           | 1     | 2     | E       | 10321.7131  | -7.7                   |
| 16  | 5           | 1     | 4     | 4           | 1     | 3     | A       | 12785.6748  | -1.1                   |
| 17  | 6           | 1     | 5     | 5           | 1     | 4     | A       | 15153.6716  | -0.4                   |
| 18  | 7           | 1     | 6     | 6           | 1     | 5     | A       | 17400.7724  | -0.6                   |
| 19  | 7           | 1     | 6     | 6           | 1     | 5     | E       | 17400.1954  | 1.0                    |
| 20  | 8           | 1     | 7     | 7           | 1     | 6     | A       | 19519.3488  | 1.4                    |
| 21  | 3           | 1     | 3     | 2           | 0     | 2     | A       | 8431.1589   | 0.8                    |
| 22  | 3           | 1     | 3     | 2           | 0     | 2     | E       | 8430.7677   | -1.1                   |
| 23  | 5           | 1     | 5     | 4           | 0     | 4     | A       | 11873.0271  | -6.8                   |
| 24  | 5           | 1     | 5     | 4           | 0     | 4     | E       | 11872.8035  | 7.8                    |
| 25  | 7           | 1     | 7     | 6           | 0     | 6     | A       | 15447.5886  | 5.0                    |
| 26  | 7           | 1     | 7     | 6           | 0     | 6     | E       | 15447.4066  | -0.3                   |
| 27  | 8           | 1     | 8     | 7           | 0     | 7     | A       | 17343.3760  | -4.2                   |
| 28  | 3           | 1     | 3     | 2           | 1     | 2     | A       | 6624.6517   | -1.8                   |
| 29  | 3           | 1     | 3     | 2           | 1     | 2     | E       | 6624.6252   | 2.3                    |
| 30  | 4           | 1     | 4     | 3           | 1     | 3     | A       | 8784.4645   | -4.4                   |
| 31  | 4           | 1     | 4     | 3           | 1     | 3     | E       | 8784.3731   | 3.6                    |
| 32  | 5           | 1     | 5     | 4           | 1     | 4     | A       | 10912.5635  | 7.3                    |
| 33  | 5           | 1     | 5     | 4           | 1     | 4     | E       | 10912.4295  | 3.7                    |
| 34  | 6           | 1     | 6     | 5           | 1     | 5     | A       | 13010.7723  | -4.7                   |
| 35  | 2           | 2     | 1     | 1           | 1     | 0     | A       | 11659.9921  | -0.7                   |
| 36  | 3           | 2     | 2     | 2           | 1     | 1     | A       | 13682.7119  | 0.9                    |
| 37  | 4           | 2     | 3     | 3           | 1     | 2     | A       | 15504.9674  | -3.8                   |
| 38  | 6           | 2     | 5     | 5           | 1     | 4     | A       | 18614.4892  | -3.6                   |
| 39  | 6           | 2     | 5     | 5           | 1     | 4     | E       | 18613.3772  | -3.2                   |
| 40  | 7           | 2     | 6     | 6           | 1     | 5     | A       | 19983.0908  | -0.1                   |

|    |   |   |   |   |   |   |   |            |      |
|----|---|---|---|---|---|---|---|------------|------|
| 41 | 7 | 2 | 6 | 6 | 1 | 5 | E | 19982.2205 | 4.5  |
| 42 | 2 | 2 | 0 | 1 | 1 | 1 | A | 12098.5074 | -0.6 |
| 43 | 3 | 2 | 1 | 2 | 1 | 2 | A | 15090.3963 | 6.3  |
| 44 | 4 | 2 | 2 | 3 | 2 | 1 | A | 10058.3707 | -2.5 |
| 45 | 5 | 2 | 3 | 4 | 2 | 2 | A | 12757.3388 | -0.2 |
| 46 | 6 | 2 | 4 | 5 | 2 | 3 | A | 15469.7088 | 1.5  |
| 47 | 3 | 3 | 0 | 2 | 2 | 1 | A | 18986.4988 | 0.1  |
| 48 | 4 | 3 | 1 | 3 | 2 | 2 | A | 21508.3639 | 1.4  |
| 49 | 5 | 3 | 2 | 4 | 2 | 3 | A | 24166.6037 | 0.7  |
| 50 | 3 | 3 | 1 | 2 | 2 | 0 | A | 18934.2535 | 1.2  |
| 51 | 4 | 3 | 2 | 3 | 2 | 1 | A | 21244.5356 | -1.1 |
| 52 | 5 | 3 | 3 | 4 | 2 | 2 | A | 23380.5364 | -2.3 |

**Table S7e:** Observed frequencies  $\nu_{obs}$  of 52 rotational transitions of the  $^{13}\text{C}(5)$  isotopologue (for atom numbering see Figure 1) of *syn*-2AT with  $\nu_{obs}-\nu_{calc}$  values obtained from a fit with the program *XIAM*.

| No. | <i>J</i>    | <i>K<sub>a</sub></i> | <i>K<sub>c</sub></i> | <i>J</i>    | <i>K<sub>a</sub></i> | <i>K<sub>c</sub></i> | Species | $\nu_{obs}$ | $\nu_{obs}-\nu_{calc}$ |
|-----|-------------|----------------------|----------------------|-------------|----------------------|----------------------|---------|-------------|------------------------|
|     | upper level |                      |                      | lower level |                      |                      |         | MHz         | kHz                    |
| 1   | 4           | 0                    | 4                    | 3           | 0                    | 3                    | A       | 9201.5158   | -1.1                   |
| 2   | 4           | 0                    | 4                    | 3           | 0                    | 3                    | E       | 9201.3222   | -0.5                   |
| 3   | 5           | 0                    | 5                    | 4           | 0                    | 4                    | A       | 11262.1456  | -2.4                   |
| 4   | 5           | 0                    | 5                    | 4           | 0                    | 4                    | E       | 11261.9636  | 3.7                    |
| 5   | 8           | 0                    | 8                    | 7           | 0                    | 7                    | A       | 17237.0861  | -2.0                   |
| 6   | 3           | 0                    | 3                    | 2           | 1                    | 2                    | A       | 5185.9231   | 0.7                    |
| 7   | 3           | 0                    | 3                    | 2           | 1                    | 2                    | E       | 5186.1304   | -0.8                   |
| 8   | 5           | 0                    | 5                    | 4           | 1                    | 4                    | A       | 10255.0555  | -1.3                   |
| 9   | 5           | 0                    | 5                    | 4           | 1                    | 4                    | E       | 10254.9986  | 4.1                    |
| 10  | 6           | 0                    | 6                    | 5           | 1                    | 5                    | A       | 12613.1286  | -0.5                   |
| 11  | 6           | 0                    | 6                    | 5           | 1                    | 5                    | E       | 12613.0196  | 4.6                    |
| 12  | 7           | 0                    | 7                    | 6           | 1                    | 6                    | A       | 14855.8710  | -3.3                   |
| 13  | 7           | 0                    | 7                    | 6           | 1                    | 6                    | E       | 14855.7400  | 6.5                    |
| 14  | 2           | 1                    | 2                    | 1           | 0                    | 1                    | A       | 6622.5767   | -0.8                   |
| 15  | 2           | 1                    | 2                    | 1           | 0                    | 1                    | E       | 6622.0324   | -2.4                   |
| 16  | 3           | 1                    | 3                    | 2           | 0                    | 2                    | A       | 8472.2200   | -2.1                   |
| 17  | 3           | 1                    | 3                    | 2           | 0                    | 2                    | E       | 8471.8080   | -2.2                   |
| 18  | 5           | 1                    | 5                    | 4           | 0                    | 4                    | A       | 11912.8653  | -2.0                   |
| 19  | 5           | 1                    | 5                    | 4           | 0                    | 4                    | E       | 11912.6158  | 0.9                    |
| 20  | 6           | 1                    | 6                    | 5           | 0                    | 5                    | A       | 13656.0879  | -2.9                   |
| 21  | 6           | 1                    | 6                    | 5           | 0                    | 5                    | E       | 13655.8870  | 4.5                    |
| 22  | 7           | 1                    | 7                    | 6           | 0                    | 6                    | A       | 15472.4960  | 0.4                    |
| 23  | 7           | 1                    | 7                    | 6           | 0                    | 6                    | E       | 15472.3199  | 7.6                    |
| 24  | 8           | 1                    | 8                    | 7           | 0                    | 7                    | A       | 17360.6081  | -2.9                   |
| 25  | 9           | 1                    | 9                    | 8           | 0                    | 8                    | A       | 19302.5038  | -4.8                   |

|    |   |   |   |   |   |   |   |            |      |
|----|---|---|---|---|---|---|---|------------|------|
| 26 | 4 | 1 | 4 | 3 | 1 | 3 | A | 8776.9964  | -2.5 |
| 27 | 4 | 1 | 4 | 3 | 1 | 3 | E | 8776.9058  | 0.0  |
| 28 | 5 | 1 | 5 | 4 | 1 | 4 | A | 10905.7729 | -3.1 |
| 29 | 5 | 1 | 5 | 4 | 1 | 4 | E | 10905.6523 | 2.8  |
| 30 | 6 | 1 | 6 | 5 | 1 | 5 | A | 13005.3693 | -2.2 |
| 31 | 6 | 1 | 6 | 5 | 1 | 5 | E | 13005.2321 | 4.6  |
| 32 | 7 | 1 | 7 | 6 | 1 | 6 | A | 15080.2498 | -3.4 |
| 33 | 7 | 1 | 7 | 6 | 1 | 6 | E | 15080.1061 | 6.3  |
| 34 | 4 | 1 | 3 | 3 | 1 | 2 | A | 10292.8874 | -1.7 |
| 35 | 4 | 1 | 3 | 3 | 1 | 2 | E | 10292.4341 | -5.3 |
| 36 | 5 | 1 | 4 | 4 | 1 | 3 | A | 12755.2910 | -1.2 |
| 37 | 5 | 1 | 4 | 4 | 1 | 3 | E | 12754.7675 | -4.9 |
| 38 | 6 | 1 | 5 | 5 | 1 | 4 | A | 15127.3592 | 2.1  |
| 39 | 6 | 1 | 5 | 5 | 1 | 4 | E | 15126.7893 | -1.8 |
| 40 | 3 | 2 | 2 | 2 | 1 | 1 | A | 13799.1296 | -2.3 |
| 41 | 4 | 2 | 3 | 3 | 1 | 2 | A | 15624.6643 | -0.2 |
| 42 | 6 | 2 | 5 | 5 | 1 | 4 | A | 18745.5455 | 1.7  |
| 43 | 4 | 2 | 2 | 3 | 1 | 3 | A | 18579.3377 | 6.8  |
| 44 | 4 | 2 | 2 | 3 | 2 | 1 | A | 10018.5013 | -1.0 |
| 45 | 4 | 2 | 2 | 3 | 2 | 1 | E | 10015.9106 | 0.5  |
| 46 | 5 | 2 | 3 | 4 | 2 | 2 | A | 12703.9302 | 1.0  |
| 47 | 3 | 3 | 0 | 2 | 2 | 1 | A | 19175.7193 | -2.5 |
| 48 | 4 | 3 | 1 | 3 | 2 | 2 | A | 21686.3554 | -3.4 |
| 49 | 3 | 3 | 1 | 2 | 2 | 0 | A | 19126.0273 | 0.7  |
| 50 | 4 | 3 | 2 | 3 | 2 | 1 | A | 21435.3493 | -0.9 |
| 51 | 5 | 3 | 3 | 4 | 2 | 2 | A | 23577.3983 | 0.6  |
| 52 | 3 | 3 | 1 | 3 | 2 | 2 | A | 11951.1091 | 4.2  |

**Table S7f:** Observed frequencies  $\nu_{obs}$  of 57 rotational transitions of the  $^{13}\text{C}(6)$  isotopologue (for atom numbering see Figure 1) of *syn*-2AT with  $\nu_{obs}-\nu_{calc}$  values obtained from a fit with the program XIAM.

| No. | $J \quad K_a \quad K_c$ |   |   | $J \quad K_a \quad K_c$ |   |   | Species | $\nu_{obs}$<br>MHz | $\nu_{obs}-\nu_{calc}$<br>kHz |
|-----|-------------------------|---|---|-------------------------|---|---|---------|--------------------|-------------------------------|
|     | upper level             |   |   | lower level             |   |   |         |                    |                               |
| 1   | 3                       | 0 | 3 | 2                       | 0 | 2 | E       | 7082.3227          | 2.4                           |
| 2   | 4                       | 0 | 4 | 3                       | 0 | 3 | A       | 9252.8636          | -2.6                          |
| 3   | 4                       | 0 | 4 | 3                       | 0 | 3 | E       | 9252.6725          | 4.9                           |
| 4   | 5                       | 0 | 5 | 4                       | 0 | 4 | E       | 11321.6964         | 5.4                           |
| 5   | 6                       | 0 | 6 | 5                       | 0 | 5 | E       | 13332.4374         | 12.8                          |
| 6   | 5                       | 0 | 5 | 4                       | 1 | 4 | A       | 10332.3192         | -2.2                          |
| 7   | 5                       | 0 | 5 | 4                       | 1 | 4 | E       | 10332.2543         | -0.9                          |
| 8   | 6                       | 0 | 6 | 5                       | 1 | 5 | A       | 12697.4709         | -4.7                          |
| 9   | 6                       | 0 | 6 | 5                       | 1 | 5 | E       | 12697.3615         | 3.7                           |
| 10  | 7                       | 0 | 7 | 6                       | 1 | 6 | A       | 14946.8973         | -8.2                          |

|    |   |   |   |   |   |   |   |            |       |
|----|---|---|---|---|---|---|---|------------|-------|
| 11 | 7 | 0 | 7 | 6 | 1 | 6 | E | 14946.7620 | 0.9   |
| 12 | 1 | 1 | 1 | 0 | 0 | 0 | A | 4605.1618  | -0.2  |
| 13 | 2 | 1 | 2 | 1 | 0 | 1 | A | 6638.7860  | -8.4  |
| 14 | 2 | 1 | 2 | 1 | 0 | 1 | E | 6638.2545  | 3.2   |
| 15 | 3 | 1 | 3 | 2 | 0 | 2 | A | 8497.3292  | -4.6  |
| 16 | 4 | 1 | 4 | 3 | 0 | 3 | A | 10242.4220 | -6.2  |
| 17 | 5 | 1 | 5 | 4 | 0 | 4 | A | 11957.0091 | -5.9  |
| 18 | 5 | 1 | 5 | 4 | 0 | 4 | E | 11956.7635 | 5.7   |
| 19 | 6 | 1 | 6 | 5 | 0 | 5 | A | 13712.7561 | -8.3  |
| 20 | 6 | 1 | 6 | 5 | 0 | 5 | E | 13712.5595 | 8.2   |
| 21 | 7 | 1 | 7 | 6 | 0 | 6 | E | 15542.8130 | 6.1   |
| 22 | 8 | 1 | 8 | 7 | 0 | 7 | E | 17444.8320 | 0.2   |
| 23 | 4 | 1 | 3 | 3 | 1 | 2 | A | 10362.0824 | -0.6  |
| 24 | 5 | 1 | 4 | 4 | 1 | 3 | A | 12838.2129 | -1.9  |
| 25 | 5 | 1 | 4 | 4 | 1 | 3 | E | 12837.6830 | 0.0   |
| 26 | 6 | 1 | 5 | 5 | 1 | 4 | A | 15221.0495 | -1.2  |
| 27 | 6 | 1 | 5 | 5 | 1 | 4 | E | 15220.4750 | 3.0   |
| 28 | 4 | 1 | 4 | 3 | 1 | 3 | A | 8827.6014  | -2.5  |
| 29 | 4 | 1 | 4 | 3 | 1 | 3 | E | 8827.5122  | 6.5   |
| 30 | 5 | 1 | 5 | 4 | 1 | 4 | E | 10967.3260 | 4.0   |
| 31 | 6 | 1 | 6 | 5 | 1 | 5 | A | 13077.6293 | -3.5  |
| 32 | 6 | 1 | 6 | 5 | 1 | 5 | E | 13077.4880 | 3.5   |
| 33 | 7 | 1 | 7 | 6 | 1 | 6 | A | 15162.8256 | -12.1 |
| 34 | 7 | 1 | 7 | 6 | 1 | 6 | E | 15162.6830 | 2.8   |
| 35 | 2 | 2 | 1 | 1 | 1 | 0 | A | 11781.8452 | 0.7   |
| 36 | 2 | 2 | 1 | 1 | 1 | 0 | E | 11767.5071 | 1.0   |
| 37 | 3 | 2 | 2 | 2 | 1 | 1 | A | 13815.4714 | -2.2  |
| 38 | 4 | 2 | 3 | 3 | 1 | 2 | A | 15649.2106 | -7.5  |
| 39 | 5 | 2 | 4 | 4 | 1 | 3 | A | 17295.0990 | -3.1  |
| 40 | 5 | 2 | 4 | 4 | 1 | 3 | E | 17293.5410 | 7.0   |
| 41 | 6 | 2 | 5 | 5 | 1 | 4 | A | 18781.3527 | -6.8  |
| 42 | 6 | 2 | 5 | 5 | 1 | 4 | E | 18780.1692 | 6.8   |
| 43 | 2 | 2 | 0 | 1 | 1 | 1 | A | 12218.4270 | 1.4   |
| 44 | 3 | 2 | 1 | 2 | 1 | 2 | A | 15215.7355 | 2.3   |
| 45 | 3 | 2 | 1 | 2 | 1 | 2 | E | 15217.6521 | -1.1  |
| 46 | 4 | 2 | 2 | 3 | 1 | 3 | A | 18650.6426 | -2.4  |
| 47 | 4 | 2 | 2 | 3 | 1 | 3 | E | 18650.1396 | 2.9   |
| 48 | 3 | 2 | 2 | 3 | 1 | 3 | A | 8326.2547  | 5.8   |
| 49 | 3 | 2 | 2 | 3 | 1 | 3 | E | 8321.9001  | -2.8  |
| 50 | 3 | 2 | 2 | 2 | 2 | 1 | A | 7268.0645  | -6.0  |
| 51 | 3 | 3 | 1 | 2 | 2 | 0 | A | 19133.5990 | 2.9   |
| 52 | 3 | 3 | 1 | 2 | 2 | 0 | E | 19079.2916 | -3.6  |
| 53 | 4 | 3 | 2 | 3 | 2 | 1 | A | 21455.7555 | 0.4   |
| 54 | 5 | 3 | 3 | 4 | 2 | 2 | A | 23606.3727 | 0.9   |
| 55 | 5 | 3 | 3 | 4 | 2 | 2 | E | 23588.5896 | 1.7   |
| 56 | 3 | 3 | 0 | 3 | 2 | 1 | A | 11683.6259 | 1.3   |
| 57 | 3 | 3 | 0 | 3 | 2 | 1 | E | 11718.3825 | -3.9  |

**Table S7g:** Observed frequencies  $\nu_{obs}$  of 54 rotational transitions of the  $^{13}\text{C}(8)$  isotopologue (for atom numbering see Figure 1) of *syn*-2AT with  $\nu_{obs}-\nu_{calc}$  values obtained from a fit with the program *XIAM*.

| No. | <i>J</i>    | <i>K<sub>a</sub></i> | <i>K<sub>c</sub></i> | <i>J</i>    | <i>K<sub>a</sub></i> | <i>K<sub>c</sub></i> | Species | $\nu_{obs}$ | $\nu_{obs}-\nu_{calc}$ |
|-----|-------------|----------------------|----------------------|-------------|----------------------|----------------------|---------|-------------|------------------------|
|     | upper level |                      |                      | lower level |                      |                      |         | MHz         | kHz                    |
| 1   | 2           | 0                    | 2                    | 1           | 0                    | 1                    | A       | 4747.6477   | -1.1                   |
| 2   | 2           | 0                    | 2                    | 1           | 0                    | 1                    | E       | 4747.5023   | -2.6                   |
| 3   | 3           | 0                    | 3                    | 2           | 0                    | 2                    | A       | 7008.9898   | -0.9                   |
| 4   | 3           | 0                    | 3                    | 2           | 0                    | 2                    | E       | 7008.8088   | -2.2                   |
| 5   | 4           | 0                    | 4                    | 3           | 0                    | 3                    | A       | 9157.6858   | 4.0                    |
| 6   | 4           | 0                    | 4                    | 3           | 0                    | 3                    | E       | 9157.4934   | 2.0                    |
| 7   | 5           | 0                    | 5                    | 4           | 0                    | 4                    | A       | 11206.1878  | -2.6                   |
| 8   | 5           | 0                    | 5                    | 4           | 0                    | 4                    | E       | 11206.0082  | 4.1                    |
| 9   | 6           | 0                    | 6                    | 5           | 0                    | 5                    | A       | 13196.7304  | -12.3                  |
| 10  | 3           | 0                    | 3                    | 2           | 1                    | 2                    | A       | 5180.5269   | -1.1                   |
| 11  | 3           | 0                    | 3                    | 2           | 1                    | 2                    | E       | 5180.7530   | 7.2                    |
| 12  | 4           | 0                    | 4                    | 3           | 1                    | 3                    | A       | 7750.8299   | 0.3                    |
| 13  | 4           | 0                    | 4                    | 3           | 1                    | 3                    | E       | 7750.8796   | 3.0                    |
| 14  | 6           | 0                    | 6                    | 5           | 1                    | 5                    | A       | 12563.1125  | -2.7                   |
| 15  | 6           | 0                    | 6                    | 5           | 1                    | 5                    | E       | 12563.0071  | -6.2                   |
| 16  | 3           | 1                    | 2                    | 2           | 1                    | 1                    | A       | 7736.9698   | -1.0                   |
| 17  | 3           | 1                    | 2                    | 2           | 1                    | 1                    | E       | 7736.5850   | -6.2                   |
| 18  | 4           | 1                    | 3                    | 3           | 1                    | 2                    | A       | 10252.5662  | -1.0                   |
| 19  | 5           | 1                    | 4                    | 4           | 1                    | 3                    | A       | 12703.2558  | 0.6                    |
| 20  | 6           | 1                    | 5                    | 5           | 1                    | 4                    | A       | 15062.2374  | 0.2                    |
| 21  | 3           | 1                    | 3                    | 2           | 0                    | 2                    | A       | 8415.8404   | -2.6                   |
| 22  | 3           | 1                    | 3                    | 2           | 0                    | 2                    | E       | 8415.4245   | -1.3                   |
| 23  | 4           | 1                    | 4                    | 3           | 0                    | 3                    | A       | 10143.1645  | 0.5                    |
| 24  | 4           | 1                    | 4                    | 3           | 0                    | 3                    | E       | 10142.8375  | 2.4                    |
| 25  | 5           | 1                    | 5                    | 4           | 0                    | 4                    | E       | 11839.5619  | 6.2                    |
| 26  | 6           | 1                    | 6                    | 5           | 0                    | 5                    | A       | 13576.6959  | -7.6                   |
| 27  | 6           | 1                    | 6                    | 5           | 0                    | 5                    | E       | 13576.4912  | 4.7                    |
| 28  | 5           | 1                    | 5                    | 4           | 1                    | 4                    | A       | 10854.3388  | 3.1                    |
| 29  | 5           | 1                    | 5                    | 4           | 1                    | 4                    | E       | 10854.2173  | 5.4                    |
| 30  | 6           | 1                    | 6                    | 5           | 1                    | 5                    | A       | 12943.0729  | -3.1                   |
| 31  | 6           | 1                    | 6                    | 5           | 1                    | 5                    | E       | 12942.9397  | 4.7                    |
| 32  | 7           | 1                    | 7                    | 6           | 1                    | 6                    | A       | 15007.1191  | -7.6                   |
| 33  | 7           | 1                    | 7                    | 6           | 1                    | 6                    | E       | 15006.9826  | 6.5                    |
| 34  | 8           | 1                    | 8                    | 7           | 1                    | 7                    | E       | 17052.2408  | 5.1                    |
| 35  | 2           | 2                    | 1                    | 1           | 1                    | 0                    | A       | 11677.0879  | 1.3                    |
| 36  | 3           | 2                    | 2                    | 2           | 1                    | 1                    | A       | 13689.8922  | -0.9                   |
| 37  | 4           | 2                    | 3                    | 3           | 1                    | 2                    | A       | 15505.2311  | 6.0                    |
| 38  | 5           | 2                    | 4                    | 4           | 1                    | 3                    | A       | 17134.8765  | -1.8                   |
| 39  | 6           | 2                    | 5                    | 5           | 1                    | 4                    | A       | 18606.5469  | -1.8                   |
| 40  | 2           | 2                    | 0                    | 1           | 1                    | 1                    | A       | 12108.2367  | -3.1                   |

|    |   |   |   |   |   |   |   |            |      |
|----|---|---|---|---|---|---|---|------------|------|
| 41 | 3 | 2 | 1 | 2 | 1 | 2 | A | 15072.4498 | -0.7 |
| 42 | 4 | 2 | 2 | 3 | 1 | 3 | A | 18468.2707 | 2.9  |
| 43 | 3 | 2 | 1 | 2 | 2 | 0 | A | 7374.2255  | 0.2  |
| 44 | 4 | 2 | 2 | 3 | 2 | 1 | A | 9983.1967  | -0.9 |
| 45 | 5 | 2 | 3 | 4 | 2 | 2 | A | 12660.2135 | 0.4  |
| 46 | 6 | 2 | 4 | 5 | 2 | 3 | A | 15353.3020 | 1.1  |
| 47 | 3 | 3 | 0 | 2 | 2 | 1 | A | 19014.2715 | -1.4 |
| 48 | 4 | 3 | 1 | 3 | 2 | 2 | A | 21516.4860 | -1.1 |
| 49 | 5 | 3 | 2 | 4 | 2 | 3 | A | 24149.7539 | -0.3 |
| 50 | 3 | 3 | 1 | 2 | 2 | 0 | A | 18963.9264 | -0.4 |
| 51 | 4 | 3 | 2 | 3 | 2 | 1 | A | 21262.2144 | 0.6  |
| 52 | 3 | 3 | 1 | 3 | 2 | 2 | A | 11819.0809 | 2.5  |
| 53 | 4 | 3 | 2 | 4 | 2 | 3 | A | 11939.2866 | -1.3 |
| 54 | 5 | 3 | 3 | 5 | 2 | 4 | A | 12169.6230 | 1.3  |

**Table S-8a:** Observed frequencies  $\nu_{obs}$  of 63 rotational transitions of the  $^{34}\text{S}(1)$  isotopologue (for atom numbering see Figure 1) of *anti*-2AT with  $\nu_{obs}-\nu_{calc}$  values obtained from a fit with the program XIAM.

| No. | <i>J K<sub>a</sub> K<sub>c</sub></i> |   |   | <i>J K<sub>a</sub> K<sub>c</sub></i> |   |   | Species | $\nu_{obs}$<br>MHz | $\nu_{obs}-\nu_{calc}$<br>kHz |
|-----|--------------------------------------|---|---|--------------------------------------|---|---|---------|--------------------|-------------------------------|
|     | upper level                          |   |   | lower level                          |   |   |         |                    |                               |
| 1   | 2                                    | 0 | 2 | 1                                    | 0 | 1 | A       | 4799.7839          | -0.8                          |
| 2   | 2                                    | 0 | 2 | 1                                    | 0 | 1 | E       | 4799.4338          | -2.9                          |
| 3   | 3                                    | 0 | 3 | 2                                    | 0 | 2 | A       | 7074.1520          | -1.3                          |
| 4   | 3                                    | 0 | 3 | 2                                    | 0 | 2 | E       | 7073.7786          | 0.1                           |
| 5   | 4                                    | 0 | 4 | 3                                    | 0 | 3 | A       | 9226.1908          | 1.3                           |
| 6   | 4                                    | 0 | 4 | 3                                    | 0 | 3 | E       | 9225.8724          | 1.0                           |
| 7   | 5                                    | 0 | 5 | 4                                    | 0 | 4 | A       | 11275.4921         | 2.4                           |
| 8   | 5                                    | 0 | 5 | 4                                    | 0 | 4 | E       | 11275.2480         | 1.3                           |
| 9   | 6                                    | 0 | 6 | 5                                    | 0 | 5 | A       | 13271.5844         | 0.6                           |
| 10  | 6                                    | 0 | 6 | 5                                    | 0 | 5 | E       | 13271.3877         | -0.5                          |
| 11  | 7                                    | 0 | 7 | 6                                    | 0 | 6 | A       | 15257.1026         | -1.3                          |
| 12  | 7                                    | 0 | 7 | 6                                    | 0 | 6 | E       | 15256.9240         | -1.2                          |
| 13  | 8                                    | 0 | 8 | 7                                    | 0 | 7 | A       | 17250.9398         | -1.1                          |
| 14  | 8                                    | 0 | 8 | 7                                    | 0 | 7 | E       | 17250.7635         | -0.6                          |
| 15  | 9                                    | 0 | 9 | 8                                    | 0 | 8 | A       | 19255.9165         | -0.3                          |
| 16  | 9                                    | 0 | 9 | 8                                    | 0 | 8 | E       | 19255.7384         | 0.2                           |
| 17  | 4                                    | 0 | 4 | 3                                    | 1 | 3 | A       | 7923.4659          | 0.1                           |
| 18  | 4                                    | 0 | 4 | 3                                    | 1 | 3 | E       | 7922.9792          | -1.1                          |
| 19  | 5                                    | 0 | 5 | 4                                    | 1 | 4 | A       | 10388.5892         | -2.7                          |
| 20  | 5                                    | 0 | 5 | 4                                    | 1 | 4 | E       | 10388.0881         | 3.6                           |
| 21  | 6                                    | 0 | 6 | 5                                    | 1 | 5 | A       | 12719.7455         | -0.1                          |
| 22  | 7                                    | 0 | 7 | 6                                    | 1 | 6 | A       | 14937.3648         | 1.4                           |
| 23  | 7                                    | 0 | 7 | 6                                    | 1 | 6 | E       | 14936.9818         | -0.8                          |
| 24  | 3                                    | 1 | 3 | 2                                    | 0 | 2 | A       | 8376.8705          | -6.5                          |
| 25  | 3                                    | 1 | 3 | 2                                    | 0 | 2 | E       | 8376.6705          | 0.8                           |



|           |   |   |   |   |   |   |   |            |      |
|-----------|---|---|---|---|---|---|---|------------|------|
| <b>26</b> | 4 | 1 | 4 | 3 | 0 | 3 | A | 10113.0854 | -1.9 |
| <b>27</b> | 4 | 1 | 4 | 3 | 0 | 3 | E | 10113.0340 | 0.3  |
| <b>28</b> | 5 | 1 | 5 | 4 | 0 | 4 | A | 11827.3248 | -3.1 |
| <b>29</b> | 5 | 1 | 5 | 4 | 0 | 4 | E | 11827.3452 | 2.2  |
| <b>30</b> | 6 | 1 | 6 | 5 | 0 | 5 | A | 13591.3284 | 4.1  |
| <b>31</b> | 7 | 1 | 7 | 6 | 0 | 6 | A | 15432.9083 | -0.7 |
| <b>32</b> | 7 | 1 | 7 | 6 | 0 | 6 | E | 15432.8681 | -1.0 |
| <b>33</b> | 8 | 1 | 8 | 7 | 0 | 7 | A | 17344.0105 | 0.5  |
| <b>34</b> | 9 | 1 | 9 | 8 | 0 | 8 | A | 19303.8247 | -0.1 |
| <b>35</b> | 9 | 1 | 9 | 8 | 0 | 8 | E | 19303.6969 | -1.6 |
| <b>36</b> | 4 | 1 | 4 | 3 | 1 | 3 | A | 8810.3638  | 0.3  |
| <b>37</b> | 5 | 1 | 5 | 4 | 1 | 4 | A | 10940.4309 | 0.8  |
| <b>38</b> | 5 | 1 | 5 | 4 | 1 | 4 | E | 10940.1819 | 1.1  |
| <b>39</b> | 6 | 1 | 6 | 5 | 1 | 5 | A | 13039.4856 | -0.5 |
| <b>40</b> | 6 | 1 | 6 | 5 | 1 | 5 | E | 13039.2355 | 1.1  |
| <b>41</b> | 7 | 1 | 7 | 6 | 1 | 6 | A | 15113.1714 | 2.9  |
| <b>42</b> | 7 | 1 | 7 | 6 | 1 | 6 | E | 15112.9271 | 0.5  |
| <b>43</b> | 9 | 1 | 9 | 8 | 1 | 8 | A | 19210.7578 | 2.0  |
| <b>44</b> | 9 | 1 | 9 | 8 | 1 | 8 | E | 19210.5410 | -0.8 |
| <b>45</b> | 5 | 1 | 4 | 4 | 1 | 3 | A | 12854.8587 | -0.4 |
| <b>46</b> | 6 | 1 | 5 | 5 | 1 | 4 | A | 15218.3979 | 0.4  |
| <b>47</b> | 7 | 1 | 6 | 6 | 1 | 5 | A | 17451.3925 | -0.6 |
| <b>48</b> | 8 | 1 | 7 | 7 | 1 | 6 | A | 19550.9600 | -0.5 |
| <b>49</b> | 2 | 2 | 1 | 1 | 1 | 0 | A | 11487.0696 | -4.4 |
| <b>50</b> | 3 | 2 | 2 | 2 | 1 | 1 | A | 13512.7123 | -5.1 |
| <b>51</b> | 4 | 2 | 3 | 3 | 1 | 2 | A | 15332.3707 | 7.9  |
| <b>52</b> | 2 | 2 | 0 | 1 | 1 | 1 | A | 11940.0670 | 3.0  |
| <b>53</b> | 3 | 2 | 1 | 2 | 1 | 2 | A | 14970.9564 | -0.9 |
| <b>54</b> | 4 | 2 | 2 | 3 | 1 | 3 | A | 18465.7994 | 5.4  |
| <b>55</b> | 3 | 2 | 2 | 3 | 1 | 3 | A | 8067.4215  | -2.6 |
| <b>56</b> | 3 | 3 | 0 | 3 | 2 | 1 | A | 11170.2119 | 1.3  |
| <b>57</b> | 4 | 3 | 1 | 4 | 2 | 2 | A | 10852.1345 | 5.0  |
| <b>58</b> | 3 | 3 | 1 | 2 | 2 | 0 | A | 18648.5461 | -1.0 |
| <b>59</b> | 4 | 3 | 2 | 3 | 2 | 1 | A | 20963.6163 | -1.0 |
| <b>60</b> | 5 | 3 | 3 | 4 | 2 | 2 | A | 23092.1148 | -1.9 |
| <b>61</b> | 3 | 3 | 0 | 2 | 2 | 1 | A | 18705.3866 | -3.0 |
| <b>62</b> | 4 | 3 | 1 | 3 | 3 | 0 | A | 9823.5251  | -2.1 |
| <b>63</b> | 4 | 3 | 1 | 3 | 3 | 0 | E | 9812.1617  | -0.2 |

**Table S-8b:** Observed frequencies  $\nu_{obs}$  of 10 rotational transitions of the  $^{13}\text{C}(4)$  isotopologue (for atom numbering see Figure 1) of *anti*-2AT with  $\nu_{obs}-\nu_{calc}$  values obtained from a fit with the program XIAM.

| No. | $J$         | $K_a$ | $K_c$ | $J$         | $K_a$ | $K_c$ | Species | $\nu_{obs}$ | $\nu_{obs}-\nu_{calc}$ |
|-----|-------------|-------|-------|-------------|-------|-------|---------|-------------|------------------------|
|     | upper level |       |       | lower level |       |       |         | MHz         | kHz                    |
| 1   | 4           | 0     | 4     | 3           | 0     | 3     | A       | 9199.6654   | 0.5                    |
| 2   | 6           | 0     | 6     | 5           | 0     | 5     | A       | 13244.2061  | 1.8                    |
| 3   | 5           | 0     | 5     | 4           | 1     | 4     | A       | 10317.7121  | 0.9                    |
| 4   | 6           | 0     | 6     | 5           | 1     | 5     | A       | 12655.3432  | -0.8                   |
| 5   | 3           | 1     | 3     | 2           | 0     | 2     | A       | 8398.6726   | 0.9                    |
| 6   | 4           | 1     | 4     | 3           | 0     | 3     | A       | 10131.6664  | -2.0                   |
| 7   | 5           | 1     | 5     | 4           | 0     | 4     | A       | 11838.5763  | 1.2                    |
| 8   | 7           | 1     | 7     | 6           | 0     | 6     | A       | 15419.1082  | -0.5                   |
| 9   | 3           | 1     | 3     | 2           | 1     | 2     | A       | 6622.8479   | -1.1                   |
| 10  | 4           | 1     | 4     | 3           | 1     | 3     | A       | 8780.8686   | -1.6                   |

**Table S-8c:** Observed frequencies  $\nu_{obs}$  of 11 rotational transitions of the  $^{13}\text{C}(5)$  isotopologue (for atom numbering see Figure 1) of *anti*-2AT with  $\nu_{obs}-\nu_{calc}$  values obtained from a fit with the program XIAM.

| No. | $J$         | $K_a$ | $K_c$ | $J$         | $K_a$ | $K_c$ | Species | $\nu_{obs}$ | $\nu_{obs}-\nu_{calc}$ |
|-----|-------------|-------|-------|-------------|-------|-------|---------|-------------|------------------------|
|     | upper level |       |       | lower level |       |       |         | MHz         | kHz                    |
| 1   | 4           | 0     | 4     | 3           | 0     | 3     | A       | 9196.6294   | 0.7                    |
| 2   | 5           | 0     | 5     | 4           | 0     | 4     | A       | 11251.1826  | -1.5                   |
| 3   | 6           | 0     | 6     | 5           | 1     | 5     | A       | 12628.9231  | -0.6                   |
| 4   | 5           | 1     | 5     | 4           | 0     | 4     | A       | 11870.6874  | -1.4                   |
| 5   | 4           | 1     | 4     | 3           | 1     | 3     | A       | 8775.0477   | 0.4                    |
| 6   | 2           | 2     | 1     | 1           | 1     | 0     | A       | 11672.5008  | -3.7                   |
| 7   | 3           | 2     | 2     | 2           | 1     | 1     | A       | 13693.5005  | 3.0                    |
| 8   | 4           | 2     | 3     | 3           | 1     | 2     | A       | 15514.9364  | -2.6                   |
| 9   | 5           | 2     | 4     | 4           | 1     | 3     | A       | 17149.0402  | 4.3                    |
| 10  | 2           | 2     | 0     | 1           | 1     | 1     | A       | 12108.7493  | -2.7                   |
| 11  | 3           | 2     | 1     | 2           | 1     | 2     | A       | 15093.3946  | 2.2                    |

**Table S-9a:** Observed frequencies  $\nu_{obs}$  of 5 rotational transitions of the  $^{13}\text{C}(6)$  isotopologue (for atom numbering see Figure 1) of *anti*-2AT with  $\nu_{obs}-\nu_{calc}$  values obtained from a fit with the program XIAM.

| No. | <i>J</i>    | <i>K<sub>a</sub></i> | <i>K<sub>c</sub></i> | <i>J</i>    | <i>K<sub>a</sub></i> | <i>K<sub>c</sub></i> | Species | $\nu_{obs}$ | $\nu_{obs}-\nu_{calc}$ |
|-----|-------------|----------------------|----------------------|-------------|----------------------|----------------------|---------|-------------|------------------------|
|     | upper level |                      |                      | lower level |                      |                      |         | MHz         | kHz                    |
| 1   | 5           | 0                    | 5                    | 4           | 0                    | 4                    | A       | 11309.3166  | 4.6                    |
| 2   | 6           | 0                    | 6                    | 5           | 0                    | 5                    | A       | 13315.4302  | -8.7                   |
| 3   | 7           | 0                    | 7                    | 6           | 0                    | 6                    | A       | 15307.2960  | 5.0                    |
| 4   | 6           | 0                    | 6                    | 5           | 1                    | 5                    | A       | 12710.1858  | 0.0                    |
| 5   | 5           | 1                    | 5                    | 4           | 1                    | 4                    | A       | 10961.4417  | -1.0                   |

**Table S-9b:** Observed frequencies  $\nu_{obs}$  of 9 rotational transitions of the  $^{13}\text{C}(3)$  isotopologue (for atom numbering see Figure 1) of *anti*-2AT with  $\nu_{obs}-\nu_{calc}$  values obtained from a fit with the program XIAM.

| No. | <i>J</i>    | <i>K<sub>a</sub></i> | <i>K<sub>c</sub></i> | <i>J</i>    | <i>K<sub>a</sub></i> | <i>K<sub>c</sub></i> | Species | $\nu_{obs}$ | $\nu_{obs}-\nu_{calc}$ |
|-----|-------------|----------------------|----------------------|-------------|----------------------|----------------------|---------|-------------|------------------------|
|     | upper level |                      |                      | lower level |                      |                      |         | MHz         | kHz                    |
| 1   | 4           | 0                    | 4                    | 3           | 0                    | 3                    | A       | 9258.7938   | -16.5                  |
| 2   | 5           | 0                    | 5                    | 4           | 0                    | 4                    | A       | 11315.9877  | -4.2                   |
| 3   | 6           | 0                    | 6                    | 5           | 0                    | 5                    | A       | 13319.4859  | -61.5                  |
| 4   | 4           | 1                    | 4                    | 3           | 1                    | 3                    | A       | 8841.1585   | -12.5                  |
| 5   | 5           | 1                    | 5                    | 4           | 1                    | 4                    | A       | 10978.9239  | -27.9                  |
| 6   | 6           | 1                    | 6                    | 5           | 1                    | 5                    | A       | 13085.7459  | 67.5                   |
| 7   | 7           | 1                    | 7                    | 6           | 1                    | 6                    | A       | 15166.9951  | 32.5                   |
| 8   | 8           | 1                    | 8                    | 7           | 1                    | 7                    | A       | 17229.5229  | 0.6                    |
| 9   | 2           | 2                    | 0                    | 1           | 1                    | 1                    | A       | 11991.8085  | 4.2                    |

**Table S-9c:** Observed frequencies  $\nu_{obs}$  of 7 rotational transitions of the  $^{13}\text{C}(2)$  and  $^{13}\text{C}(8)$  isotopologues (for atom numbering see Figure 1) of *anti*-2AT. A fit was not possible.

| No. | $^{13}\text{C}$ | <i>J</i>    | <i>K<sub>a</sub></i> | <i>K<sub>c</sub></i> | <i>J</i>    | <i>K<sub>a</sub></i> | <i>K<sub>c</sub></i> | Species | $\nu_{obs}$ |
|-----|-----------------|-------------|----------------------|----------------------|-------------|----------------------|----------------------|---------|-------------|
|     |                 | upper level |                      |                      | lower level |                      |                      |         | [MHz]       |
| 1   | <b>C(2)</b>     | 4           | 1                    | 3                    | 3           | 1                    | 2                    | A       | 10442.6442  |
| 2   | <b>C(2)</b>     | 2           | 2                    | 1                    | 1           | 1                    | 0                    | A       | 11680.9726  |
| 3   | <b>C(2)</b>     | 2           | 2                    | 0                    | 1           | 1                    | 1                    | A       | 12130.4247  |
| 4   | <b>C(8)</b>     | 4           | 0                    | 4                    | 3           | 0                    | 3                    | A       | 9176.9291   |
| 5   | <b>C(8)</b>     | 4           | 1                    | 3                    | 3           | 1                    | 2                    | A       | 10299.0271  |
| 6   | <b>C(8)</b>     | 2           | 2                    | 1                    | 1           | 1                    | 0                    | A       | 11568.2513  |
| 7   | <b>C(8)</b>     | 2           | 2                    | 0                    | 1           | 1                    | 1                    | A       | 12008.2391  |

**Table S-10:** Molecular parameters of  $^{13}\text{C}(3)$ - and  $^{13}\text{C}(6)$ -isotopologues of *anti*-2AT obtained with the program *XIAM*.

| <b>Par.<sup>a</sup></b> | <b>Unit</b>            | <b><math>^{13}\text{C}(3)</math></b> | <b><math>^{13}\text{C}(6)</math></b> |
|-------------------------|------------------------|--------------------------------------|--------------------------------------|
| $A_0$                   | MHz                    | 3507.206(45)                         | 3554.856(54)                         |
| $B_0$                   | MHz                    | 1417.755(32)                         | 1408.849(13)                         |
| $C_0$                   | MHz                    | 1016.4673(47)                        | 1015.7426(29)                        |
| $\Delta_c^c$            | $\text{u}\text{\AA}^2$ | -3.370                               | -3.337                               |
| $N_A^d$                 | -                      | 9                                    | 5                                    |
| $\sigma^e$              | kHz                    | 46.1                                 | 11.1                                 |

<sup>a</sup> All parameters refer to the principal axis system. Watson's S reduction and I<sup>r</sup> representation were used. <sup>b</sup> Values of all centrifugal distortion constants were fixed to those of the main isotopologue listed in Table 2. <sup>c</sup> Pseudo inertial defect. <sup>d</sup> Number of A species transitions. <sup>e</sup> Standard deviation of the fit.

**Table S-11a:** Observed frequencies  $\nu_{obs}$  of 53 rotational transitions of thiophene with  $\nu_{obs}-\nu_{calc}$  values obtained from a fit with the program XIAM.

| No. | $J$         | $K_a$ | $K_c$ | $J$         | $K_a$ | $K_c$ | $\nu_{obs}$ | $\nu_{obs}-\nu_{calc}$ |
|-----|-------------|-------|-------|-------------|-------|-------|-------------|------------------------|
|     | upper level |       |       | lower level |       |       | MHz         | kHz                    |
| 1   | 1           | 0     | 1     | 0           | 0     | 0     | 8654.0412   | 0.5                    |
| 2   | 2           | 0     | 2     | 1           | 0     | 1     | 16401.6345  | 0.7                    |
| 3   | 2           | 1     | 2     | 1           | 1     | 1     | 15125.5902  | 0.6                    |
| 4   | 2           | 1     | 1     | 1           | 1     | 0     | 19490.5337  | 0.4                    |
| 5   | 2           | 1     | 1     | 2           | 1     | 2     | 6547.4230   | -0.1                   |
| 6   | 3           | 0     | 3     | 2           | 0     | 2     | 23044.1927  | 2.2                    |
| 7   | 3           | 1     | 3     | 2           | 1     | 2     | 22202.3216  | 2.7                    |
| 8   | 3           | 2     | 2     | 2           | 2     | 1     | 25962.0490  | 5.0                    |
| 9   | 3           | 1     | 2     | 3           | 1     | 3     | 12833.9824  | 1.2                    |
| 10  | 3           | 2     | 1     | 3           | 2     | 2     | 3824.2748   | -0.2                   |
| 11  | 4           | 1     | 3     | 4           | 1     | 4     | 20212.5488  | 2.2                    |
| 12  | 4           | 2     | 3     | 4           | 0     | 4     | 23245.2961  | 1.2                    |
| 13  | 4           | 2     | 2     | 4           | 2     | 3     | 9061.3091   | -0.9                   |
| 14  | 5           | 2     | 3     | 5           | 2     | 4     | 16217.6486  | 0.8                    |
| 15  | 5           | 3     | 2     | 5           | 3     | 3     | 5111.4661   | 0.2                    |
| 16  | 6           | 2     | 4     | 6           | 2     | 5     | 24377.7926  | 0.8                    |
| 17  | 6           | 3     | 3     | 6           | 3     | 4     | 11099.7337  | -0.1                   |
| 18  | 7           | 3     | 4     | 7           | 3     | 5     | 19089.5166  | 1.2                    |
| 19  | 7           | 4     | 3     | 7           | 4     | 4     | 6139.0405   | 0.3                    |
| 20  | 8           | 4     | 4     | 8           | 4     | 5     | 12774.9279  | 1.4                    |
| 21  | 9           | 4     | 5     | 9           | 4     | 6     | 21548.1703  | 1.2                    |
| 22  | 9           | 5     | 4     | 9           | 5     | 5     | 6958.8187   | -0.1                   |
| 23  | 10          | 5     | 5     | 10          | 5     | 6     | 14150.9665  | -1.1                   |
| 24  | 10          | 6     | 4     | 10          | 6     | 5     | 2998.5411   | 0.4                    |
| 25  | 11          | 6     | 5     | 11          | 6     | 6     | 7605.2573   | -0.1                   |
| 26  | 12          | 6     | 6     | 12          | 6     | 7     | 15270.7729  | -1.5                   |
| 27  | 12          | 7     | 5     | 12          | 7     | 6     | 3281.0970   | 1.5                    |
| 28  | 13          | 7     | 6     | 13          | 7     | 7     | 8104.0418   | 1.3                    |
| 29  | 14          | 7     | 7     | 14          | 7     | 8     | 16166.2706  | -1.0                   |
| 30  | 14          | 8     | 6     | 14          | 8     | 7     | 3495.3390   | 0.3                    |
| 31  | 15          | 8     | 7     | 15          | 8     | 8     | 8475.6931   | -0.2                   |
| 32  | 16          | 8     | 8     | 16          | 8     | 9     | 16862.9940  | -2.1                   |
| 33  | 16          | 9     | 7     | 16          | 9     | 8     | 3651.0061   | 0.2                    |
| 34  | 17          | 9     | 8     | 17          | 9     | 9     | 8737.3523   | -0.2                   |
| 35  | 18          | 9     | 9     | 18          | 9     | 10    | 17382.4533  | 3.4                    |
| 36  | 18          | 10    | 8     | 18          | 10    | 9     | 3756.4651   | 1.0                    |
| 37  | 19          | 10    | 9     | 19          | 10    | 10    | 8903.7305   | -1.3                   |
| 38  | 20          | 10    | 10    | 20          | 10    | 11    | 17743.4050  | -0.7                   |
| 39  | 3           | 1     | 2     | 2           | 1     | 1     | 28488.8735  | -3.5                   |
| 40  | 3           | 2     | 1     | 2           | 2     | 0     | 28879.8913  | -1.0                   |
| 41  | 4           | 0     | 4     | 3           | 0     | 3     | 29317.3760  | -0.2                   |

|           |   |   |   |   |   |   |            |      |
|-----------|---|---|---|---|---|---|------------|------|
| <b>42</b> | 4 | 1 | 4 | 3 | 1 | 3 | 28967.7303 | -0.8 |
| <b>43</b> | 4 | 1 | 3 | 3 | 1 | 2 | 36346.2952 | -1.3 |
| <b>44</b> | 4 | 2 | 3 | 3 | 2 | 2 | 33880.1269 | 0.2  |
| <b>45</b> | 4 | 2 | 2 | 3 | 2 | 1 | 39117.1576 | -4.0 |
| <b>46</b> | 4 | 3 | 2 | 3 | 3 | 1 | 35899.3113 | -1.2 |
| <b>47</b> | 4 | 3 | 1 | 3 | 3 | 0 | 37250.5108 | -2.3 |
| <b>48</b> | 5 | 0 | 5 | 4 | 0 | 4 | 35664.8532 | 2.1  |
| <b>49</b> | 5 | 1 | 5 | 4 | 1 | 4 | 35552.1018 | 1.5  |
| <b>50</b> | 5 | 2 | 4 | 5 | 0 | 5 | 28866.9078 | -4.4 |
| <b>51</b> | 5 | 1 | 4 | 5 | 1 | 5 | 27612.1348 | -2.8 |
| <b>52</b> | 6 | 2 | 5 | 6 | 0 | 6 | 35031.4805 | 1.6  |
| <b>53</b> | 6 | 1 | 5 | 6 | 1 | 6 | 34596.3624 | 2.5  |

**Table S-11b:** Observed frequencies  $v_{obs}$  of 26 rotational transitions of the  $^{34}\text{S}(1)$  isotopologue (for atom numbering see Figure 6) of thiophene with  $v_{obs}-v_{calc}$  values obtained from a fit with the program XIAM.

| No.       | $J$         | $K_a$ | $K_c$ | $J$         | $K_a$ | $K_c$ | $v_{obs}$  | $v_{obs}-v_{calc}$ |
|-----------|-------------|-------|-------|-------------|-------|-------|------------|--------------------|
|           | upper level |       |       | lower level |       |       | MHz        | kHz                |
| <b>1</b>  | 1           | 0     | 1     | 0           | 0     | 0     | 8458.0270  | 1.5                |
| <b>2</b>  | 2           | 0     | 2     | 1           | 0     | 1     | 16100.1520 | 0.6                |
| <b>3</b>  | 2           | 1     | 2     | 1           | 1     | 1     | 14825.7000 | 0.5                |
| <b>4</b>  | 2           | 1     | 1     | 1           | 1     | 0     | 19006.3630 | -0.6               |
| <b>5</b>  | 2           | 1     | 1     | 2           | 1     | 2     | 6271.0030  | -0.6               |
| <b>6</b>  | 3           | 0     | 3     | 2           | 0     | 2     | 22693.7400 | 2.4                |
| <b>7</b>  | 3           | 1     | 3     | 2           | 1     | 2     | 21798.2050 | 1.6                |
| <b>8</b>  | 3           | 2     | 2     | 2           | 2     | 1     | 25374.0050 | 5.2                |
| <b>9</b>  | 3           | 1     | 2     | 3           | 1     | 3     | 12323.9367 | 0.0                |
| <b>10</b> | 4           | 1     | 3     | 4           | 1     | 4     | 19532.5175 | 4.2                |
| <b>11</b> | 4           | 2     | 2     | 4           | 2     | 3     | 8404.5020  | -2.9               |
| <b>12</b> | 5           | 2     | 3     | 5           | 2     | 4     | 15232.9810 | -3.2               |
| <b>13</b> | 6           | 3     | 3     | 6           | 3     | 4     | 9951.7062  | 5.3                |
| <b>14</b> | 7           | 3     | 4     | 7           | 3     | 5     | 17500.2147 | -0.1               |
| <b>15</b> | 9           | 5     | 4     | 9           | 5     | 5     | 5531.1179  | -0.9               |
| <b>16</b> | 3           | 1     | 2     | 2           | 1     | 1     | 27851.1322 | -4.3               |
| <b>17</b> | 3           | 2     | 1     | 2           | 2     | 0     | 28054.2561 | -2.2               |
| <b>18</b> | 4           | 0     | 4     | 3           | 0     | 3     | 28875.7365 | -1.3               |
| <b>19</b> | 4           | 1     | 4     | 3           | 1     | 3     | 28475.0220 | -0.6               |
| <b>20</b> | 4           | 1     | 3     | 3           | 1     | 2     | 35683.5962 | -3.0               |
| <b>21</b> | 4           | 2     | 3     | 3           | 2     | 2     | 33172.9006 | 2.0                |
| <b>22</b> | 4           | 2     | 2     | 3           | 2     | 1     | 38081.2639 | -1.6               |
| <b>23</b> | 4           | 3     | 2     | 3           | 3     | 1     | 35008.1875 | 0.0                |
| <b>24</b> | 4           | 3     | 1     | 3           | 3     | 0     | 36160.8187 | -0.7               |
| <b>25</b> | 5           | 0     | 5     | 4           | 0     | 4     | 35108.1135 | 0.8                |
| <b>26</b> | 5           | 1     | 5     | 4           | 1     | 4     | 34969.3261 | 1.2                |

**Table S-11c:** Observed frequencies  $\nu_{obs}$  of 25 rotational transitions of the  $^{13}\text{C}(2)$  isotopologue (for atom numbering see Figure 6) of thiophene with  $\nu_{obs}-\nu_{calc}$  values obtained from a fit with the program XIAM.

| No. | <i>J</i>    | <i>K<sub>a</sub></i> | <i>K<sub>c</sub></i> | <i>J</i>    | <i>K<sub>a</sub></i> | <i>K<sub>c</sub></i> | $\nu_{obs}$ | $\nu_{obs}-\nu_{calc}$ |
|-----|-------------|----------------------|----------------------|-------------|----------------------|----------------------|-------------|------------------------|
|     | upper level |                      |                      | lower level |                      |                      | MHz         | kHz                    |
| 1   | 1           | 0                    | 1                    | 0           | 0                    | 0                    | 8623.2089   | -0.2                   |
| 2   | 2           | 0                    | 2                    | 1           | 0                    | 1                    | 16275.1988  | 0.0                    |
| 3   | 2           | 1                    | 2                    | 1           | 1                    | 1                    | 15032.8106  | 0.9                    |
| 4   | 2           | 1                    | 1                    | 1           | 1                    | 0                    | 19459.9874  | 0.5                    |
| 5   | 2           | 1                    | 1                    | 2           | 1                    | 2                    | 6640.7693   | -4.1                   |
| 6   | 3           | 0                    | 3                    | 2           | 0                    | 2                    | 22802.8919  | 2.6                    |
| 7   | 3           | 1                    | 3                    | 2           | 1                    | 2                    | 22031.4103  | 2.1                    |
| 8   | 3           | 2                    | 2                    | 2           | 2                    | 1                    | 25869.5563  | 6.7                    |
| 9   | 3           | 1                    | 2                    | 3           | 1                    | 3                    | 12982.8012  | -2.4                   |
| 10  | 4           | 1                    | 3                    | 4           | 1                    | 4                    | 20321.4057  | 4.3                    |
| 11  | 4           | 2                    | 3                    | 4           | 0                    | 4                    | 22890.8029  | -0.2                   |
| 12  | 4           | 2                    | 2                    | 4           | 2                    | 3                    | 9443.1864   | 2.4                    |
| 13  | 5           | 2                    | 3                    | 5           | 2                    | 4                    | 16706.3696  | -0.4                   |
| 14  | 6           | 3                    | 3                    | 6           | 3                    | 4                    | 11892.284   | -0.2                   |
| 15  | 3           | 1                    | 2                    | 2           | 1                    | 1                    | 28373.4359  | -2.5                   |
| 16  | 3           | 2                    | 1                    | 2           | 2                    | 0                    | 28936.2012  | -3.3                   |
| 17  | 4           | 0                    | 4                    | 3           | 0                    | 3                    | 29011.9713  | -2.4                   |
| 18  | 4           | 1                    | 4                    | 3           | 1                    | 3                    | 28713.2119  | -2.2                   |
| 19  | 4           | 1                    | 3                    | 3           | 1                    | 2                    | 36051.8094  | -2.4                   |
| 20  | 4           | 2                    | 3                    | 3           | 2                    | 2                    | 33700.2646  | -1.0                   |
| 21  | 4           | 2                    | 2                    | 3           | 2                    | 1                    | 39105.5958  | -0.3                   |
| 22  | 4           | 3                    | 2                    | 3           | 3                    | 1                    | 35844.9441  | -1.7                   |
| 23  | 4           | 3                    | 1                    | 3           | 3                    | 0                    | 37360.5802  | 0.9                    |
| 24  | 5           | 0                    | 5                    | 4           | 0                    | 4                    | 35311.1689  | 1.7                    |
| 25  | 5           | 1                    | 5                    | 4           | 1                    | 4                    | 35221.0393  | 1.6                    |

**Table S-11c:** Observed frequencies  $\nu_{obs}$  of 25 rotational transitions of the  $^{13}\text{C}(3)$  isotopologue (for atom numbering see Figure 6) of thiophene with  $\nu_{obs}-\nu_{calc}$  values obtained from a fit with the program XIAM.

| No. | $J$         | $K_a$ | $K_c$ | $J$         | $K_a$ | $K_c$ | $\nu_{obs}$ | $\nu_{obs}-\nu_{calc}$ |
|-----|-------------|-------|-------|-------------|-------|-------|-------------|------------------------|
|     | upper level |       |       | lower level |       |       | MHz         | kHz                    |
| 1   | 1           | 0     | 1     | 0           | 0     | 0     | 8509.9242   | 1.8                    |
| 2   | 2           | 0     | 2     | 1           | 0     | 1     | 16157.6790  | 0.4                    |
| 3   | 2           | 1     | 2     | 1           | 1     | 1     | 14891.1492  | 1.7                    |
| 4   | 2           | 1     | 1     | 1           | 1     | 0     | 19148.5038  | 0.8                    |
| 5   | 2           | 1     | 1     | 2           | 1     | 2     | 6386.0383   | -2.4                   |
| 6   | 3           | 0     | 3     | 2           | 0     | 2     | 22730.9485  | 1.8                    |
| 7   | 3           | 1     | 3     | 2           | 1     | 2     | 21873.1888  | 2.0                    |
| 8   | 3           | 1     | 2     | 3           | 1     | 3     | 12531.3151  | 0.8                    |
| 9   | 3           | 2     | 2     | 2           | 2     | 1     | 25529.6906  | 0.8                    |
| 10  | 4           | 1     | 3     | 4           | 1     | 4     | 19788.0675  | 2.6                    |
| 11  | 4           | 2     | 3     | 4           | 0     | 4     | 22987.4129  | -0.6                   |
| 12  | 4           | 2     | 2     | 4           | 2     | 3     | 8725.4490   | -1.3                   |
| 13  | 5           | 2     | 3     | 5           | 2     | 4     | 15697.3295  | 1.5                    |
| 14  | 6           | 3     | 3     | 6           | 3     | 4     | 10546.0745  | -0.1                   |
| 15  | 3           | 1     | 2     | 2           | 1     | 1     | 28018.4579  | -2.5                   |
| 16  | 3           | 2     | 1     | 2           | 2     | 0     | 28328.4283  | -1.7                   |
| 17  | 4           | 0     | 4     | 3           | 0     | 3     | 28919.7995  | -0.6                   |
| 18  | 4           | 1     | 4     | 3           | 1     | 3     | 28552.4378  | -2.3                   |
| 19  | 4           | 1     | 3     | 3           | 1     | 2     | 35809.1884  | -2.3                   |
| 20  | 4           | 2     | 3     | 3           | 2     | 2     | 33341.0812  | 1.7                    |
| 21  | 4           | 2     | 2     | 3           | 2     | 1     | 38405.6410  | -2.4                   |
| 22  | 4           | 3     | 2     | 3           | 3     | 1     | 35269.2515  | 0.8                    |
| 23  | 4           | 3     | 1     | 3           | 3     | 0     | 36527.0927  | 0.0                    |
| 24  | 5           | 0     | 5     | 4           | 0     | 4     | 35173.1968  | 0.7                    |
| 25  | 5           | 1     | 5     | 4           | 1     | 4     | 35051.2017  | 1.5                    |



**Table S-12:** Ab initio structures of 2AT (bond lengths in Å, angles in degree).

| Method<br>Basis set    | CCSD(T)_ae<br>cc-pwCVTZ | MP2(ae)<br>cc-pwCVQZ | MP2(ae)<br>cc-pwCVTZ | $r_e(\text{BO})^a$ |
|------------------------|-------------------------|----------------------|----------------------|--------------------|
| <b><i>anti</i>-2AT</b> |                         |                      |                      |                    |
| S-C5                   | 1.7095                  | 1.6901               | 1.6937               | 1.7059             |
| S-C2                   | 1.7260                  | 1.7044               | 1.7080               | 1.7225             |
| C-S-C                  | 91.896                  | 92.6137              | 92.5191              | 91.990             |
| C4=C5                  | 1.3722                  | 1.3776               | 1.3786               | 1.3712             |
| S-C5=C4                | 111.995                 | 111.5599             | 111.6030             | 111.952            |
| C2=C3                  | 1.3750                  | 1.3817               | 1.3825               | 1.3742             |
| S-C2=C3                | 111.019                 | 110.7981             | 110.8112             | 111.006            |
| C5-H                   | 1.0775                  | 1.0756               | 1.0762               | 1.0769             |
| S-C5-H                 | 120.145                 | 120.2746             | 120.3060             | 120.114            |
| C2-C6                  | 1.4804                  | 1.4708               | 1.4721               | 1.4790             |
| S-C2-C6                | 123.481                 | 123.1423             | 123.3239             | 123.299            |
| C4-H                   | 1.0793                  | 1.0772               | 1.0780               | 1.0786             |
| C5=C4-H                | 124.375                 | 124.6499             | 124.6463             | 124.378            |
| C3-H                   | 1.0793                  | 1.0774               | 1.0780               | 1.0787             |
| C2=C3-H                | 125.476                 | 125.9372             | 125.9385             | 125.475            |
| C6-O                   | 1.2164                  | 1.2172               | 1.2187               | 1.2150             |
| C2-C6=O                | 120.190                 | 120.1798             | 120.2019             | 120.167            |
| C6-C8                  | 1.5098                  | 1.5013               | 1.5034               | 1.5076             |
| C2-C6-C8               | 117.708                 | 117.7275             | 117.6606             | 117.774            |
| C8-Hs                  | 1.0859                  | 1.0825               | 1.0833               | 1.0851             |
| C6-C8-Hs               | 109.185                 | 109.1644             | 109.1439             | 109.206            |
| C8-Ha                  | 1.0911                  | 1.0872               | 1.0880               | 1.0903             |
| C6-C8-Ha               | 110.232                 | 110.3083             | 110.3144             | 110.226            |
| C2-C6-C8-Ha            | 59.278                  | 59.3239              | 59.3356              | 59.267             |
| <b><i>syn</i>-2AT</b>  |                         |                      |                      |                    |
| S-C5                   | 1.7095                  | 1.6907               | 1.6940               | 1.7063             |
| S-C2                   | 1.7229                  | 1.7022               | 1.7060               | 1.7191             |
| C-S-C                  | 91.491                  | 92.147               | 92.064               | 91.574             |
| C4=C5                  | 1.3719                  | 1.3766               | 1.3776               | 1.3708             |
| S-C5=C4                | 112.537                 | 112.163              | 112.196              | 112.503            |
| C2=C3                  | 1.3763                  | 1.3830               | 1.3838               | 1.3754             |
| S-C2=C3                | 111.460                 | 111.239              | 111.249              | 111.450            |
| C5-H                   | 1.0777                  | 1.0758               | 1.0764               | 1.0771             |
| S-C5-H                 | 120.111                 | 120.194              | 120.250              | 120.055            |
| C2-C6                  | 1.4740                  | 1.4646               | 1.4658               | 1.4728             |
| S-C2-C6                | 119.295                 | 119.247              | 119.139              | 119.403            |
| C4-H                   | 1.0793                  | 1.0772               | 1.0779               | 1.0785             |
| C5=C4-H                | 123.723                 | 124.687              | 124.663              | 123.748            |
| C3-H                   | 1.0800                  | 1.0777               | 1.0784               | 1.0793             |
| C2=C3-H                | 123.258                 | 124.491              | 124.462              | 123.287            |

|             |         |          |          |         |
|-------------|---------|----------|----------|---------|
| C6-O        | 1.2177  | 1.2189   | 1.2204   | 1.2162  |
| C2-C6=O     | 120.883 | 120.9621 | 121.0125 | 120.832 |
| C6-C8       | 1.5106  | 1.5016   | 1.5038   | 1.5083  |
| C2-C6-C8    | 117.032 | 116.9066 | 116.8089 | 117.130 |
| C8-Hs       | 1.0860  | 1.0824   | 1.0833   | 1.0851  |
| C6-C8-Hs    | 108.896 | 108.9780 | 108.9562 | 108.918 |
| C8-Ha       | 1.0905  | 1.0866   | 1.0874   | 1.0897  |
| C6-C8-Ha    | 110.302 | 110.2829 | 110.2991 | 110.286 |
| C2-C6-C8-Ha | 59.454  | 59.409   | 59.421   | 59.443  |

<sup>a</sup> See Eq. (1).

**Table S13:** Semi-experimental equilibrium rotational constants for *syn*-2AT and residuals of the fit (all values in MHz).

|                    | $A_e$    | Exp.–Calc. | $B_e$    | Exp.–Calc. | $C_e$    | Exp.–Calc. |
|--------------------|----------|------------|----------|------------|----------|------------|
| Parent             | 3604.051 | 0.033      | 1426.549 | 0.005      | 1028.525 | 0.005      |
| <sup>34</sup> S    | 3542.552 | −0.002     | 1419.546 | −0.003     | 1019.845 | −0.001     |
| <sup>13</sup> C(2) | 3603.014 | 0.100      | 1426.432 | −0.012     | 1028.381 | 0.003      |
| <sup>13</sup> C(3) | 3553.989 | 0.000      | 1425.514 | 0.001      | 1023.872 | 0.000      |
| <sup>13</sup> C(4) | 3564.950 | 0.003      | 1411.935 | −0.001     | 1017.744 | 0.000      |
| <sup>13</sup> C(5) | 3603.904 | −0.018     | 1406.024 | 0.000      | 1017.801 | −0.000     |
| <sup>13</sup> C(6) | 3603.954 | 0.018      | 1416.266 | −0.001     | 1023.16  | 0.001      |
| <sup>13</sup> C(8) | 3572.365 | −0.002     | 1401.074 | −0.001     | 1012.685 | −0.001     |

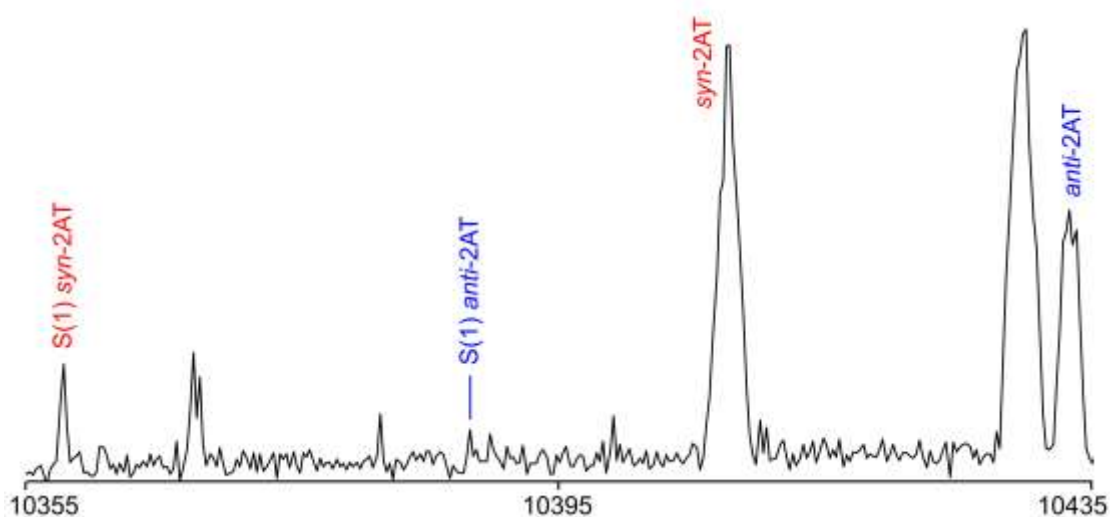

**Figure S-1:** A portion of the scan of 2AT in the frequency range from 10355 to 10435 MHz recorded by overlapping spectra with 50 co-added decays per each spectrum. Lines belonging to the  $5_{05} \leftarrow 4_{14}$  transition of the parent species and of the <sup>34</sup>S-isotopologue are labelled with the corresponding conformer. The intensities are given in a logarithmic scale in an arbitrary unit. The temperature of the molecular jet was approximately 1-2 K.
